# Supplementary material
Source: Research Square preprint supplement (doi:10.21203/rs.3.rs-9158071/v1)
Supplement: Supplementary file 1 [file fee477f2fa4bbd7e6ddd7d38.xlsx]

## Sheet: ReadMe
SUPPLEMENTARY INFORMATION 1
Diverse consumption patterns in countries nearing social and climate goals challenge their use as role models
Teddy Serrano1,2, Anders Bjørn1,2, Etienne Berthet3, Michael Hauschild1,2
1Centre for Absolute Sustainability, Technical University of Denmark, Kgs Lyngby, Denmark
2Section for Quantitative Sustainability Assessment, Department of Environmental and Resource Engineering, Technical University of Denmark, Kgs Lyngby, Denmark
3Centre for Sustainability Science and Strategy, Department of Earth, Atmospheric & Planetary Sciences, Massachusetts Institute of Technology
This file contains additional data used in this study. It is organized in several tabs:
Tab	Description
Summary	Synthesis of the data for the 139 countries studied. Data used for Fig. 1a, 1b, 2 and 3.
NSI	Needs Satisfaction Index for the 139 countries studies, as well as the performance for each of the 12 social indicators included
CF	Carbon footprint of all countries covered by the GLORIA database, detailed per economic sector
Spendings	Spendings for all countries covered by the GLORIA database, detailed per economic sector
Population	Population data in 2019							s
HDI	HDI data in 2019
Classification GLORIA	Concordance matrix between the 120 GLORIA categories and the 5 consumption categories used in this study
Classification EXIOBASE_H	Concordance matrix between the 163 EXIOBASE (hybrid) categories and mobility, shelter or else, for allocation of GHG emissions of direct emissions of final demand
F_Y split	Allocataion key of the impacts linked to final demand between Mobility and Housing, based on EXIOBASE (hybrid) for each country
SA_Model area size	Sensitivity analysis of the choice CF limit and NSI limit on the composition of the country groups and associated spending and emission patterns
SA_Results	Table of the values for CF limit and NSI limit (and the related sizes of the "model area") used for the sensitivity analysis. Data used for Fig. 4.
SA_IQR	Interquartile ranges results of the sensitivity analysis. Data used for Fig. 5

## Sheet: Summary
						Share of emissions					Share of expenses
Country	Population	Spendings	CF	NSI	Category	Mobility	Consumables	Housing	Food	Services	Mobility	Consumables	Housing	Food	Services
SRB	8772228	7283.11	2.16645	0.96717	Green	0.154453	0.0876276	0.355083	0.129231	0.273605	0.108913	0.108872	0.252642	0.141703	0.38787
TJK	9.32102e+06	1071.57	2.54375	0.880697	Green	0.0763532	0.131202	0.249317	0.408817	0.13431	0.0689487	0.153944	0.232106	0.330297	0.214704
GHA	30417858	2179.06	2.65413	0.833125	Green	0.230665	0.23375	0.220983	0.143937	0.170665	0.0759314	0.229815	0.196792	0.138535	0.358926
SEN	1.62964e+07	1515.23	2.46034	0.803742	Green	0.143091	0.0865244	0.248097	0.404083	0.118205	0.0429882	0.113931	0.330554	0.272624	0.239902
BGD	163046173	2180.1	2.36657	0.778344	Beige	0.0958372	0.112914	0.346882	0.388737	0.0556305	0.0515465	0.146098	0.292635	0.165309	0.344411
GMB	2347696	844.287	1.57285	0.773375	Beige	0.283688	0.0389793	0.242956	0.261031	0.173346	0.0140142	0.0663985	0.257188	0.228215	0.434184
CMR	25876387	1486.01	2.51286	0.75284	Beige	0.379604	0.0721557	0.292748	0.131923	0.123569	0.101878	0.130943	0.213142	0.179142	0.374894
MLI	19658023	937.175	2.10398	0.743095	Beige	0.228947	0.101108	0.178286	0.347202	0.144456	0.0911956	0.218049	0.180581	0.268568	0.241607
CIV	25716554	2247.63	2.62602	0.721794	Beige	0.315125	0.133008	0.273876	0.183252	0.0947382	0.0912006	0.223224	0.157287	0.183093	0.345196
YEM	29161922	589.501	1.37314	0.703819	Beige	0.149004	0.109364	0.214343	0.327367	0.199922	0.0861989	0.109035	0.225473	0.278755	0.300539
BFA	2.03214e+07	779.896	2.19777	0.68225	Beige	0.413243	0.06956	0.200136	0.198569	0.118492	0.0859811	0.15238	0.211595	0.208282	0.341762
TGO	8082359	867.382	2.01248	0.665851	Beige	0.391294	0.097877	0.211821	0.129854	0.169153	0.0798497	0.200914	0.202834	0.113907	0.402495
TZA	5.80055e+07	1151.2	2.56975	0.644636	Beige	0.355208	0.0636891	0.196869	0.290938	0.0932961	0.0695136	0.106972	0.331034	0.253614	0.238865
AGO	3.18253e+07	2009.29	2.66809	0.641724	Beige	0.306811	0.0479104	0.227202	0.259219	0.158857	0.233145	0.0654591	0.265609	0.130128	0.30566
HTI	1.12631e+07	1513.72	2.70237	0.630012	Beige	0.446294	0.0736009	0.196946	0.176266	0.106893	0.310286	0.100581	0.22282	0.1085	0.257812
SLE	7813207	628.269	2.17208	0.623498	Beige	0.431771	0.055033	0.222723	0.19354	0.0969341	0.0505622	0.14408	0.0871763	0.446646	0.271535
RWA	1.26269e+07	947.97	1.80406	0.61685	Beige	0.297137	0.143282	0.235871	0.176936	0.146774	0.0743046	0.109385	0.292026	0.213156	0.311127
ZMB	17861034	1217.03	2.84728	0.606134	Beige	0.370964	0.0854021	0.29019	0.154304	0.0991397	0.089597	0.162435	0.350187	0.115041	0.282741
BEN	1.18012e+07	1185.22	2.33044	0.594813	Beige	0.383637	0.0858603	0.279208	0.176835	0.0744591	0.0204703	0.123941	0.311758	0.259944	0.283887
MOZ	3.0366e+07	704.551	2.15649	0.583599	Beige	0.32125	0.155368	0.250555	0.147544	0.125282	0.0719162	0.296806	0.20438	0.200826	0.226072
MWI	1.86287e+07	669.315	1.53117	0.572825	Beige	0.281896	0.107604	0.173567	0.29354	0.143392	0.0594071	0.10965	0.220754	0.374294	0.235894
AFG	38041757	636.561	1.17572	0.565253	Beige	0.0530324	0.131211	0.216554	0.445434	0.153769	0.0346048	0.161616	0.22119	0.312524	0.270066
BDI	1.15306e+07	339.763	1.4021	0.526837	Beige	0.446877	0.0465728	0.20606	0.177275	0.123215	0.0648962	0.108473	0.190493	0.33398	0.302158
MDG	26969306	546.703	2.22637	0.510222	Beige	0.312907	0.0667313	0.172139	0.355049	0.0931743	0.0424387	0.186058	0.252784	0.288789	0.229931
NER	23310719	612.037	2.05229	0.499162	Beige	0.199472	0.0343326	0.131099	0.554151	0.0809453	0.094996	0.0967038	0.139271	0.436686	0.232343
COD	8.67906e+07	546.605	1.67234	0.442275	Beige	0.432172	0.0875624	0.243146	0.126841	0.110278	0.0654727	0.224084	0.348208	0.103197	0.259039
CAF	4745179	538.159	2.62567	0.401666	Beige	0.263267	0.0658964	0.0879676	0.509419	0.0734502	0.234116	0.234179	0.0596015	0.162713	0.30939
LUX	615730	84199.5	36.9809	0.996936	Blue	0.185988	0.0658016	0.374674	0.282793	0.0907425	0.118706	0.0740489	0.262324	0.0516509	0.49327
AUS	25203200	50429.3	24.4507	0.997839	Blue	0.215619	0.138382	0.326622	0.120547	0.19883	0.109712	0.0966354	0.313391	0.0518742	0.428387
USA	3.29065e+08	67232	23.586	0.993181	Blue	0.280056	0.164215	0.239846	0.0945085	0.221373	0.133439	0.111017	0.215616	0.0362102	0.503718
CAN	3.7411e+07	44837.2	22.5094	0.99814	Blue	0.248884	0.123427	0.38518	0.103469	0.13904	0.120832	0.10106	0.297153	0.0489522	0.432003
IRL	4882498	74773.2	21.4909	0.994357	Blue	0.239552	0.188616	0.278104	0.0995753	0.194152	0.176452	0.138822	0.141713	0.02997	0.513044
FIN	5.53216e+06	42923.4	19.8924	1	Blue	0.175064	0.119099	0.436192	0.107234	0.162411	0.101211	0.111861	0.300431	0.0595095	0.426988
CHE	8.59136e+06	74825.7	19.5499	0.998236	Blue	0.216833	0.161097	0.233435	0.185706	0.202929	0.116644	0.113951	0.209299	0.0677836	0.492322
ARE	9770526	32326.6	18.78	0.905854	Blue	0.288017	0.140767	0.258803	0.190035	0.122378	0.244169	0.080595	0.33477	0.0776	0.262866
NOR	5378859	68623.3	17.5563	1	Blue	0.252586	0.166554	0.220804	0.149433	0.210623	0.12617	0.0978159	0.250075	0.0538654	0.472074
ISL	339037	64452.4	17.4753	1	Blue	0.200021	0.174958	0.31915	0.159999	0.145872	0.0964751	0.086212	0.346506	0.0571369	0.41367
EST	1325649	20232.2	17.2376	0.997938	Blue	0.0965328	0.104828	0.570456	0.128315	0.0998679	0.120973	0.147075	0.282761	0.0899289	0.359262
KOR	51225321	29258.4	17.1194	0.963723	Blue	0.181978	0.144327	0.370399	0.0944905	0.208805	0.0827278	0.155918	0.2444	0.0570331	0.459921
NZL	4783062	41378	17.0627	1	Blue	0.186997	0.128831	0.311346	0.274969	0.0978562	0.139505	0.104039	0.305407	0.0882005	0.362849
BEL	11539326	43102.9	17.0178	0.995929	Blue	0.198797	0.140988	0.390831	0.131614	0.137771	0.109267	0.126865	0.22278	0.0638391	0.477249
DNK	5771877	50355.5	16.5004	1	Blue	0.19922	0.127265	0.328271	0.102204	0.24304	0.11024	0.112354	0.232774	0.0453927	0.499239
NLD	17097123	43452.2	16.009	1	Blue	0.225626	0.151345	0.331297	0.131723	0.16001	0.105619	0.121519	0.22617	0.0536546	0.493038
AUT	8955108	44111.1	15.8836	0.999531	Blue	0.293533	0.185785	0.260761	0.118722	0.141199	0.117684	0.157952	0.236154	0.0522707	0.435938
DEU	8.3517e+07	40223.7	15.6485	0.995265	Blue	0.257119	0.180085	0.30261	0.1331	0.127087	0.117545	0.172665	0.213084	0.0610901	0.435617
KAZ	18551428	8457.61	15.2575	0.958499	Blue	0.130944	0.106524	0.444374	0.171803	0.146355	0.171473	0.110086	0.274822	0.129107	0.314512
SWE	10036391	46200.3	14.9701	1	Blue	0.140725	0.167505	0.411407	0.131634	0.148729	0.11633	0.130736	0.226332	0.0527939	0.473809
ISR	8519373	42183.2	14.6932	0.989834	Blue	0.177247	0.140454	0.34862	0.153155	0.180523	0.117263	0.111269	0.283737	0.0662459	0.421485
LTU	2759631	18671.2	14.2644	0.995265	Blue	0.174228	0.156327	0.379498	0.198644	0.0913034	0.155533	0.186798	0.207038	0.131886	0.318745
CZE	10689213	20583.3	13.8689	1	Blue	0.189843	0.140308	0.447221	0.118028	0.104601	0.102065	0.180776	0.265445	0.0847775	0.366936
JPN	126860299	40541.8	13.687	0.989193	Blue	0.225431	0.137955	0.357017	0.120112	0.159484	0.125744	0.115557	0.273703	0.0631923	0.421803
RUS	145872260	9713.86	13.6626	0.943402	Blue	0.201309	0.128405	0.365617	0.121568	0.1831	0.171789	0.131914	0.269179	0.0881333	0.338985
SVN	2078654	22758.1	13.1856	0.999767	Blue	0.273461	0.151244	0.319624	0.155057	0.100614	0.137303	0.189067	0.205514	0.0882167	0.3799
BTN	763094	3687.58	12.9094	0.934944	Blue	0.33964	0.0507142	0.441156	0.086205	0.0822847	0.115945	0.0701908	0.32603	0.176573	0.311261
MNG	3225166	4316.26	12.7036	0.940662	Blue	0.0916806	0.0808463	0.306576	0.356728	0.16417	0.13106	0.256819	0.177164	0.155689	0.279267
LVA	1906740	16918.9	12.4138	0.993945	Blue	0.204593	0.11569	0.448066	0.126196	0.105456	0.162648	0.153178	0.254777	0.103882	0.325515
GBR	67530161	39282.8	11.937	0.997066	Blue	0.26762	0.147713	0.273771	0.151504	0.159392	0.135937	0.11174	0.255065	0.05126	0.445997
GAB	2172578	5191.58	11.6408	0.82344	Blue	0.228077	0.308322	0.213635	0.103248	0.146719	0.0719118	0.283946	0.237453	0.111956	0.294733
FRA	65129731	38443	11.5222	0.99867	Blue	0.332678	0.136144	0.227764	0.159944	0.14347	0.111089	0.10381	0.254642	0.0670555	0.463403
CYP	1.19857e+06	20539	11.2106	0.963296	Blue	0.263436	0.131235	0.225688	0.195198	0.184444	0.158179	0.128824	0.175035	0.107974	0.429988
POL	37887771	13708.2	11.0909	0.986601	Blue	0.21912	0.119748	0.410977	0.141169	0.108986	0.142176	0.157979	0.224928	0.100713	0.374204
IRN	82913893	6509.81	10.71	0.873466	Blue	0.276015	0.162509	0.359302	0.102693	0.0994811	0.147112	0.213166	0.210041	0.162031	0.267649
SVK	5457012	17852.3	10.573	0.997119	Blue	0.183711	0.181153	0.374177	0.134677	0.126283	0.134452	0.18885	0.222343	0.0865202	0.367834
MYS	31949789	10988.7	10.5303	0.938927	Blue	0.14186	0.112726	0.443364	0.153673	0.148377	0.152175	0.133387	0.168241	0.118464	0.427734
ITA	60550092	29219.4	10.4701	0.980332	Blue	0.305732	0.145608	0.253456	0.153298	0.141906	0.133314	0.14077	0.227817	0.0836207	0.414478
GRC	10473452	17739.3	10.2475	0.991149	Blue	0.244706	0.104469	0.342306	0.159163	0.149356	0.145834	0.0941373	0.189177	0.112367	0.458484
CHN	1433783692	9981.47	10.2175	0.881558	Blue	0.0759774	0.131392	0.553108	0.13407	0.105453	0.0741028	0.166123	0.358487	0.09928	0.302007
CHL	18952035	13799.8	9.85263	0.981243	Blue	0.24237	0.185253	0.250588	0.145656	0.176133	0.16833	0.132825	0.233556	0.0991003	0.366189
TKM	5942094	5210.63	9.70413	0.914059	Blue	0.197975	0.189477	0.287985	0.173334	0.151229	0.080152	0.485084	0.157928	0.108804	0.168031
ESP	46736782	26694.9	9.55218	0.997264	Blue	0.302564	0.149489	0.205401	0.186356	0.15619	0.123982	0.131238	0.232438	0.0762628	0.43608
MLT	440377	27600.3	9.44803	0.998436	Blue	0.300932	0.153372	0.151762	0.0999938	0.29394	0.121597	0.120756	0.155718	0.0565457	0.545383
PRT	10226178	20750.4	9.39895	0.988348	Blue	0.168402	0.11767	0.387045	0.189309	0.137574	0.127198	0.125211	0.238271	0.0949729	0.414348
HUN	9684680	14616	9.25939	0.976008	Blue	0.302669	0.109698	0.347074	0.13413	0.106429	0.136393	0.161543	0.229265	0.0916583	0.38114
BIH	3300998	6273.8	9.00631	0.973182	Blue	0.199221	0.0622769	0.481326	0.114615	0.14256	0.105791	0.161446	0.300237	0.133217	0.299309
HRV	4130299	12925.1	8.6567	0.992817	Blue	0.272865	0.0899109	0.375997	0.14822	0.113007	0.140964	0.136045	0.247062	0.112191	0.36374
ZAF	58558267	6022.44	8.30934	0.899535	Blue	0.0961367	0.124291	0.493089	0.159474	0.127009	0.120209	0.11738	0.214099	0.113961	0.434351
BLR	9.45241e+06	6280.65	8.29716	0.957703	Blue	0.166729	0.06876	0.303221	0.380509	0.0807816	0.1821	0.0728193	0.192772	0.192963	0.359346
ARG	44780675	8314.33	8.27495	0.978398	Blue	0.22474	0.116102	0.172253	0.309028	0.177877	0.144227	0.121687	0.149268	0.122913	0.461905
ROU	19364558	12450.1	8.00064	0.966199	Blue	0.203983	0.131107	0.40269	0.1684	0.0938189	0.137649	0.159618	0.283067	0.111247	0.30842
URY	3461731	15170.2	7.99992	0.994635	Blue	0.214827	0.111432	0.177604	0.275507	0.220631	0.16454	0.0664281	0.112157	0.0894696	0.567406
THA	6.96256e+07	7262.13	7.87281	0.9418	Blue	0.0986423	0.152203	0.315329	0.250047	0.183779	0.122869	0.19998	0.166852	0.128563	0.381736
IRQ	39309789	5658.85	7.76646	0.804797	Blue	0.135653	0.232557	0.261803	0.147262	0.222725	0.096834	0.194068	0.262583	0.135984	0.310531
TUR	83429607	8233.83	7.67026	0.91542	Blue	0.137124	0.117013	0.418522	0.204006	0.123334	0.124027	0.151334	0.283426	0.142049	0.299164
BRA	2.1105e+08	7891.42	7.56498	0.961946	Blue	0.25156	0.0991306	0.153313	0.34968	0.146316	0.15134	0.101634	0.193537	0.103472	0.450017
BGR	7000117	8458.61	7.43218	0.975817	Blue	0.177578	0.108968	0.45383	0.146029	0.113596	0.134906	0.160499	0.239602	0.131683	0.33331
LBN	6855709	9093.07	7.0351	0.930766	Blue	0.232431	0.102971	0.435393	0.168647	0.0605582	0.202339	0.119279	0.295912	0.0769652	0.305505
AZE	10047719	4180.86	6.65637	0.898223	Blue	0.204367	0.121117	0.352479	0.227571	0.0944654	0.194509	0.106845	0.156487	0.191318	0.350841
MEX	127575529	9645.98	6.54197	0.950097	Blue	0.237235	0.157523	0.242921	0.252384	0.109938	0.180049	0.146006	0.254678	0.153243	0.266024
MKD	2083458	6247.85	6.41978	0.944131	Blue	0.151907	0.142252	0.489423	0.147563	0.0688553	0.0684408	0.228887	0.189905	0.17721	0.335557
BOL	1.15131e+07	3424.79	6.10278	0.854272	Blue	0.147706	0.0853546	0.165911	0.419817	0.181211	0.0718078	0.130913	0.251578	0.158261	0.387439
DZA	43053054	4118.03	6.05617	0.919422	Blue	0.183061	0.140188	0.330844	0.105923	0.239984	0.128931	0.155841	0.261248	0.124361	0.329619
VEN	28515829	4273.77	5.82064	0.877192	Blue	0.156582	0.0970125	0.271634	0.273708	0.201063	0.218545	0.1599	0.108037	0.124436	0.389082
PRY	7044639	5032.16	5.81217	0.942198	Blue	0.181457	0.160402	0.135852	0.335278	0.187011	0.0274549	0.212455	0.147698	0.122763	0.489629
PAN	4246440	15762.2	5.72471	0.943102	Blue	0.44431	0.100064	0.153873	0.22095	0.0808029	0.334558	0.0607153	0.22849	0.0716836	0.304553
LAO	7.16946e+06	2511	5.66793	0.822694	Blue	0.155474	0.06491	0.411261	0.250562	0.117793	0.160433	0.0926406	0.330283	0.143555	0.273089
VNM	96462108	3088.96	5.37138	0.928003	Blue	0.0760087	0.0991944	0.438434	0.282749	0.103614	0.10881	0.137432	0.298748	0.154466	0.300545
UKR	43993643	3486.16	5.21721	0.969937	Blue	0.152271	0.0774293	0.428664	0.281441	0.060195	0.0488106	0.154549	0.187463	0.281394	0.327784
UZB	32981714	2023.52	5.20564	0.936792	Blue	0.212945	0.207797	0.281467	0.236081	0.0617102	0.137441	0.261694	0.152504	0.231882	0.216478
CRI	5047561	11723.8	5.18082	0.990021	Blue	0.244903	0.172692	0.219664	0.217005	0.145735	0.135277	0.10056	0.23802	0.103911	0.422232
BLZ	390351	5395.9	5.06068	0.916121	Blue	0.139049	0.0636566	0.369754	0.230851	0.196689	0.02775	0.0573363	0.445243	0.195451	0.27422
GTM	1.75815e+07	4639.73	4.99929	0.847858	Blue	0.380457	0.105835	0.285183	0.142671	0.0858538	0.100407	0.182856	0.252296	0.114614	0.349828
COL	50339443	6325.93	4.99575	0.961217	Blue	0.17399	0.127846	0.205071	0.286896	0.206196	0.118282	0.109484	0.238738	0.12806	0.405436
MDA	4.04326e+06	3378.42	4.70428	0.941812	Blue	0.243769	0.171612	0.306552	0.140689	0.137377	0.112313	0.182957	0.230368	0.128006	0.346355
ARM	2.95773e+06	4370.95	4.6548	0.956302	Blue	0.213299	0.0931325	0.295698	0.272623	0.125247	0.0775615	0.0862193	0.170509	0.221107	0.444603
IDN	270625567	4023.67	4.60896	0.922626	Blue	0.150224	0.0857575	0.39623	0.216006	0.151783	0.160478	0.100939	0.305026	0.159634	0.273923
DOM	10738957	8295.99	4.5997	0.944744	Blue	0.314503	0.206054	0.1184	0.27086	0.0901836	0.292508	0.135366	0.179193	0.0880154	0.304918
JOR	10101697	4631.89	4.54524	0.893122	Blue	0.216862	0.183994	0.325952	0.153771	0.119422	0.114464	0.104045	0.287963	0.115951	0.377577
GEO	3.99676e+06	4349.32	4.52163	0.912278	Blue	0.204859	0.0993698	0.363247	0.241961	0.0905631	0.202355	0.137122	0.180624	0.0879053	0.391993
ECU	17373657	5875.05	4.48885	0.942413	Blue	0.163322	0.125843	0.197438	0.210794	0.302604	0.0784306	0.128886	0.157329	0.0887871	0.546567
JAM	2948277	5508.86	4.41656	0.967206	Blue	0.295693	0.130183	0.374833	0.127563	0.0717284	0.179608	0.129461	0.25588	0.0980575	0.336994
ALB	2.88091e+06	5495.54	4.30358	0.922551	Blue	0.184348	0.115653	0.3432	0.258434	0.0983656	0.0554408	0.128279	0.251363	0.191649	0.373269
PER	32510462	6517.75	4.22161	0.910283	Blue	0.237253	0.173518	0.262131	0.219556	0.107542	0.139443	0.1395	0.219578	0.119693	0.381787
NPL	2.86087e+07	1472.02	4.19786	0.862403	Blue	0.197237	0.123847	0.339264	0.288429	0.0512233	0.0532221	0.228031	0.224547	0.259926	0.234274
SLV	6453550	4535.55	4.13772	0.923166	Blue	0.205038	0.135845	0.330236	0.285798	0.0430817	0.0912911	0.148272	0.207533	0.203469	0.349435
TUN	1.16947e+07	3848.23	3.94284	0.902278	Blue	0.264624	0.148046	0.321914	0.168258	0.097158	0.125288	0.173571	0.218118	0.128766	0.354257
EGY	100388076	3346.39	3.76626	0.90164	Blue	0.217849	0.141662	0.306919	0.184514	0.149056	0.103093	0.127646	0.258579	0.181808	0.328874
MAR	3.64718e+07	3515.31	3.65221	0.827487	Blue	0.218915	0.114524	0.315324	0.233327	0.11791	0.130451	0.131927	0.201829	0.171891	0.363902
PHL	1.08117e+08	3989.16	3.54615	0.89688	Blue	0.167783	0.108971	0.27011	0.314543	0.138592	0.172401	0.132466	0.19757	0.188002	0.30956
LKA	21323734	4000	3.52558	0.939813	Blue	0.21077	0.0751921	0.317279	0.29481	0.101949	0.0806262	0.0915964	0.480424	0.146841	0.200513
KGZ	6415851	1691.65	3.42346	0.960224	Blue	0.190017	0.0465144	0.24152	0.38351	0.138439	0.189528	0.0449973	0.144983	0.282657	0.337834
HND	9.74612e+06	3021.75	3.32467	0.862945	Blue	0.364162	0.136997	0.164806	0.209955	0.12408	0.189724	0.171922	0.181209	0.175498	0.281646
BWA	2303703	7690.62	8.6191	0.797029	Red	0.35677	0.117309	0.251688	0.160545	0.113689	0.212778	0.10577	0.21581	0.0830332	0.382609
NAM	2494524	5433.69	6.88068	0.783175	Red	0.199846	0.165762	0.177913	0.347691	0.108787	0.0779627	0.140588	0.271593	0.131909	0.377947
TCD	15946882	894.05	5.42508	0.440864	Red	0.123016	0.0510052	0.0655371	0.708291	0.0521502	0.0482935	0.186095	0.149542	0.43889	0.17718
DJI	973557	4095.25	5.25414	0.753304	Red	0.170018	0.19838	0.18072	0.32812	0.122762	0.0483559	0.266751	0.205352	0.237256	0.242285
NGA	200963603	2481.66	4.4852	0.732018	Red	0.436989	0.0735114	0.291945	0.135786	0.0617683	0.0776365	0.16258	0.284736	0.245392	0.229655
ZWE	1.46455e+07	1456.62	4.27688	0.703923	Red	0.455264	0.0575844	0.281302	0.162076	0.0437744	0.252757	0.146199	0.110254	0.176146	0.314644
MRT	4.5257e+06	1907.76	3.9765	0.715726	Red	0.242031	0.197738	0.204737	0.267806	0.0876868	0.117596	0.251924	0.222779	0.183057	0.224644
COG	5.3805e+06	1903.87	3.90067	0.661879	Red	0.311031	0.0731786	0.257882	0.187551	0.170357	0.1525	0.126423	0.180767	0.229965	0.310345
MMR	54045422	1410.05	3.85484	0.768415	Red	0.149623	0.0769581	0.287795	0.271995	0.213628	0.138383	0.156602	0.221535	0.163946	0.319534
NIC	6.5455e+06	1866.64	3.75693	0.763567	Red	0.294396	0.0414328	0.261756	0.311207	0.0912081	0.107724	0.141389	0.218685	0.194165	0.338037
GIN	1.27712e+07	1078.85	3.72026	0.668239	Red	0.324756	0.0849474	0.16888	0.35409	0.0673274	0.0849323	0.256346	0.101872	0.31985	0.237
LBR	4937374	586.868	3.66051	0.616669	Red	0.621232	0.0167699	0.248808	0.0339743	0.0792153	0.234033	0.0555174	0.359099	0.0772314	0.274119
SOM	15442906	657.221	3.42849	0.575853	Red	0.408948	0.0292035	0.178315	0.304894	0.0786394	0.167774	0.0646557	0.358592	0.199629	0.209349
KEN	52573967	1979.67	3.21339	0.707365	Red	0.289205	0.0691721	0.178915	0.399904	0.0628037	0.0389729	0.0829797	0.227054	0.275807	0.375186
PAK	2.16565e+08	1415.87	3.21199	0.730154	Red	0.169106	0.137789	0.345683	0.303015	0.0444079	0.0744764	0.174771	0.214991	0.278688	0.257074
IND	1.36642e+09	2003.06	3.20487	0.762615	Red	0.152245	0.155325	0.415218	0.168223	0.108989	0.0952228	0.144381	0.317864	0.155751	0.286781
ETH	112078727	901.707	3.02199	0.614383	Red	0.415087	0.0551845	0.188127	0.280856	0.0607456	0.08701	0.0978027	0.305046	0.394476	0.115665
UGA	44269587	859.009	3.0067	0.612704	Red	0.399672	0.0957169	0.199355	0.217788	0.0874678	0.0636319	0.203647	0.205815	0.235545	0.291361
Average	5.36154e+07	13169.3	7.85942	0.85919		0.239873	0.119756	0.292679	0.216607	0.131084	0.121226	0.144303	0.234713	0.152469	0.347289

## Sheet: NSI
ISO_Code	Equality	Life satisfaction	Education	Sanitation	Democracy	Social support	Nutrition	Life expectancy	Income	Energy access	Water access	Housing	NSI	Category
AFG	NA	0.388138	0.585731	0.627474	0.43875	0.466637	0.783158	0.829231	NA	1	0.782632	0.281053	0.565253	Beige
AGO	0.696113	0.583821	0.304197	0.760526	0.4575	0.838462	0.870526	0.843077	0.725032	0.480451	0.696526	0.393884	0.641724	Beige
ALB	0.954699	0.787292	1	1	0.61	0.762628	1	1	1	1	1	0.996842	0.922551	Blue
ARE	1	1	NA	1	0.11875	0.957259	1	1	1	1	1	NA	0.905854	Blue
ARG	NA	0.9122	1	1	0.9725	0.995967	1	1	1	1	1	0.884863	0.978398	Blue
ARM	1	0.812708	0.931604	0.992421	1	0.868449	1	1	1	1	1	0.964266	0.956302	Blue
AUS	0.937151	1	1	1	1	1	1	1	1	1	1	1	0.997839	Blue
AUT	0.987874	1	1	1	1	1	1	1	1	1	1	NA	0.999531	Blue
AZE	1	0.795508	NA	1	0.24	0.985285	1	0.978461	NA	1	1	0.769193	0.898223	Blue
BDI	0.876788	0.580815	0.447159	0.613053	0.1975	0.538573	NA	0.855385	0.367022	0.119542	0.858737	0.636785	0.526837	Beige
BEL	1	1	1	1	1	0.982478	1	1	1	1	1	NA	0.995929	Blue
BEN	0.746344	0.776185	0.598021	0.379368	0.61	0.491282	0.972632	0.853846	0.8432	0.424513	0.784211	0.333408	0.594813	Beige
BFA	0.924268	0.743661	0.354386	0.550211	0.885	0.759003	0.901053	0.844615	0.731207	0.19342	0.820632	0.714564	0.68225	Beige
BGD	0.965925	0.773015	0.668679	0.800211	0.32	0.747969	0.950526	0.989231	0.91086	0.970526	1	0.499859	0.778344	Beige
BGR	0.838799	0.810077	1	1	0.77875	1	1	1	1	1	1	NA	0.975817	Blue
BIH	0.956712	0.894323	NA	1	0.65125	0.970158	1	1	1	1	1	1	0.973182	Blue
BLR	1	0.851308	1	1	0.32125	1	1	1	1	1	1	1	0.957703	Blue
BLZ	0.667675	0.916253	0.850444	1	NA	0.841036	0.990526	1	NA	0.976	1	0.88706	0.916121	Blue
BOL	0.83358	0.879369	0.909527	0.858421	0.69125	0.871446	0.92	0.973846	1	1	0.978526	0.561835	0.854272	Blue
BRA	0.665302	0.973862	1	0.941474	0.845	0.999083	1	1	0.99591	1	1	0.89582	0.961946	Blue
BTN	0.893694	0.781866	0.886292	0.894105	0.7425	0.941749	NA	0.975385	1	1	1	NA	0.934944	Blue
BWA	0.666785	0.533308	NA	0.898737	0.84	0.85963	0.74421	0.829231	0.89025	0.736418	1	0.635908	0.797029	Red
CAF	0.625191	0.534748	0.182926	0.314105	0.48625	0.355099	0.545263	0.713846	NA	0.150526	0.663368	0.32723	0.401666	Beige
CAN	0.95274	1	1	1	1	1	1	1	1	1	1	NA	0.99814	Blue
CHE	0.955128	1	1	1	1	1	1	1	1	1	1	NA	0.998236	Blue
CHL	0.793701	0.949523	1	1	1	0.965691	1	1	1	1	1	NA	0.981243	Blue
CHN	NA	0.8214	0.992623	0.984526	0.095	0.913262	1	1	1	1	0.99621	NA	0.881558	Blue
CIV	0.836074	0.816308	0.461766	0.592316	0.68	0.754873	0.89579	0.843077	0.932121	0.720627	0.840421	0.492518	0.721794	Beige
CMR	0.762273	0.791046	0.611349	0.626632	0.36625	0.789961	0.996842	0.838461	0.782552	0.668315	0.820316	0.674305	0.75284	Beige
COD	0.827147	0.663236	0.45795	0.378842	0.435	NA	0.613684	0.832308	0.319069	0.201053	0.616737	0.232614	0.442275	Beige
COG	0.729448	0.8218	0.574141	0.572842	0.3	0.694187	0.65579	0.864615	0.680448	0.509552	0.884842	0.587541	0.661879	Red
COL	0.695215	0.924985	1	1	0.82875	0.969532	0.96	1	0.997003	1	1	0.950526	0.961217	Blue
CRI	0.740173	1	1	1	1	1	1	1	1	1	1	1	0.990021	Blue
CYP	0.960859	0.957461	1	1	1	0.862309	1	1	1	1	1	NA	0.963296	Blue
CZE	1	1	1	1	1	1	1	1	1	1	1	NA	1	Blue
DEU	0.973276	1	1	1	1	0.984075	1	1	1	1	1	NA	0.995265	Blue
DJI	0.834457	NA	0.508101	0.775579	0.31875	0.703304	0.882105	0.892308	0.851798	0.644336	0.955263	NA	0.753304	Red
DNK	1	1	1	1	1	1	1	1	1	1	1	NA	1	Blue
DOM	0.829735	0.853092	0.819165	1	0.63625	0.982322	0.965263	0.984615	1	1	1	0.934222	0.944744	Blue
DZA	1	0.751862	1	1	0.36625	0.89251	1	1	1	1	1	0.87189	0.919422	Blue
ECU	0.77555	0.886769	1	1	0.81875	0.898318	0.922105	1	1	1	1	NA	0.942413	Blue
EGY	0.978086	0.658877	0.90634	1	0.22375	0.857921	0.995789	0.969231	1	1	1	1	0.90164	Blue
ESP	0.932586	0.998569	1	1	1	1	1	1	1	1	1	NA	0.997264	Blue
EST	0.995408	0.952123	1	1	1	1	1	1	1	1	1	NA	0.997938	Blue
ETH	0.92867	0.657646	0.370245	0.18	0.42125	0.831175	0.882105	0.921539	0.768341	0.505933	0.777684	0.375638	0.614383	Red
FIN	1	1	1	1	1	1	1	1	1	1	1	NA	1	Blue
FRA	0.96599	1	1	1	1	1	1	1	1	1	1	NA	0.99867	Blue
GAB	0.885366	0.746431	NA	0.827684	0.4825	0.847835	0.887368	0.886154	1	0.955014	0.97821	0.585972	0.82344	Blue
GBR	0.926445	1	1	1	1	1	1	1	1	1	1	NA	0.997066	Blue
GEO	0.91502	0.752523	1	0.91579	0.8125	0.749973	0.961053	0.995385	1	1	1	0.970042	0.912278	Blue
GHA	0.806845	0.782831	0.653737	0.742421	0.90375	0.829164	0.988421	0.892308	0.786373	0.878947	0.963474	0.700138	0.833125	Green
GIN	0.946719	0.766815	0.408666	0.590316	0.4525	0.727916	NA	0.82	0.907157	0.444211	0.885684	0.545548	0.668239	Red
GMB	0.915445	0.777077	0.604756	0.64379	0.65	0.770967	0.909474	0.876923	0.911768	0.653684	0.94	0.624254	0.773375	Beige
GRC	0.958697	0.8804	1	1	1	0.989788	1	1	1	1	1	NA	0.991149	Blue
GTM	0.738877	0.989923	0.690807	0.823474	0.72	0.860083	0.875789	0.958461	0.952407	1	0.996421	0.656842	0.847858	Blue
HND	0.740455	0.910646	0.745006	0.968421	0.475	0.88572	0.910526	0.969231	0.918495	0.958947	1	0.721053	0.862945	Blue
HRV	1	0.904877	1	1	0.91625	1	1	1	1	1	1	NA	0.992817	Blue
HTI	0.841375	0.556138	NA	0.686632	0.515	0.597751	0.56	0.858461	0.745345	0.484108	0.802	0.531236	0.630012	Beige
HUN	1	0.921785	1	1	0.575	1	1	1	1	1	1	0.976842	0.976008	Blue
IDN	NA	0.822231	0.903601	0.955684	0.7775	0.89102	0.98421	0.966154	1	1	0.973684	0.839601	0.922626	Blue
IND	NA	0.587523	0.778623	0.845474	0.575	0.62309	0.891579	0.927692	0.94724	1	0.999474	0.536728	0.762615	Red
IRL	0.980574	1	1	1	1	1	1	1	1	1	1	0.963158	0.994357	Blue
IRN	0.828524	0.726338	0.938603	1	0.25875	0.775881	0.994737	1	1	1	1	NA	0.873466	Blue
IRQ	1	0.746785	NA	1	0.49125	0.848343	0.657895	0.964615	1	1	1	0.549532	0.804797	Blue
ISL	1	1	1	1	1	1	1	1	1	1	1	NA	1	Blue
ISR	0.871243	1	1	1	0.88	1	1	1	1	1	1	NA	0.989834	Blue
ITA	0.915314	0.9974	1	1	1	0.931558	1	1	1	1	1	NA	0.980332	Blue
JAM	0.779179	0.970646	0.864288	1	1	0.975349	0.971579	1	NA	1	1	NA	0.967206	Blue
JOR	0.947775	0.676092	0.867848	1	0.335	0.880622	0.952632	1	1	1	1	0.852088	0.893122	Blue
JPN	0.959218	0.913923	1	1	1	0.975168	1	1	1	1	1	NA	0.989193	Blue
KAZ	1	0.946431	1	1	0.29625	1	1	1	1	1	1	1	0.958499	Blue
KEN	0.84606	0.708708	NA	0.606105	0.5725	0.751035	0.791579	0.887692	0.743525	0.733684	0.740526	0.517755	0.707365	Red
KGZ	1	0.883631	0.968952	1	0.54625	0.974475	0.976842	1	1	1	0.974737	0.979882	0.960224	Blue
KOR	0.979931	0.899308	1	1	1	0.870179	1	1	1	1	1	NA	0.963723	Blue
LAO	0.874251	0.773846	0.649445	0.862947	0.16	0.810493	0.996842	0.930769	0.977491	1	0.933684	0.804211	0.822694	Blue
LBN	0.973822	0.7052	0.644271	1	0.56625	0.962187	0.954737	1	1	1	1	1	0.930766	Blue
LBR	0.924779	0.711569	0.39263	0.497789	0.7625	0.791637	0.643158	0.844615	0.761918	0.243158	0.882526	0.38016	0.616669	Red
LKA	0.866489	0.665385	1	1	0.7425	0.905488	0.981053	1	1	1	0.976947	NA	0.939813	Blue
LTU	0.91846	0.962369	1	1	1	1	1	1	1	1	1	NA	0.995265	Blue
LUX	0.923313	1	1	1	1	1	1	1	1	1	1	NA	0.996936	Blue
LVA	0.927198	0.928	1	0.995789	1	1	1	1	1	1	1	NA	0.993945	Blue
MAR	0.863593	0.756615	0.726978	0.929684	0.3275	0.594227	1	0.98	1	1	0.994947	0.938412	0.827487	Blue
MDA	1	0.887138	0.906401	0.940105	0.74625	0.899074	NA	0.992308	1	1	0.965053	0.98421	0.941812	Blue
MDG	0.819312	0.647462	0.404578	0.330421	0.60625	0.778456	0.597895	0.881539	0.202842	0.326737	0.581053	0.317667	0.510222	Beige
MEX	0.78035	0.971815	0.953155	1	0.83625	0.946318	0.976842	1	1	1	1	0.867368	0.950097	Blue
MKD	0.957704	0.7848	0.834675	1	0.75125	0.905154	1	1	1	1	1	NA	0.944131	Blue
MLI	0.956601	0.726692	0.434816	0.643895	0.60875	0.838398	0.943158	0.84	0.896932	0.50354	0.893263	0.56712	0.743095	Beige
MLT	1	1	0.997912	1	0.96375	1	1	1	1	1	1	NA	0.998436	Blue
MMR	0.990045	0.680892	0.539959	0.890737	0.5425	0.847772	0.972632	0.936923	1	0.719563	0.88779	0.439147	0.768415	Red
MNG	0.960843	0.873415	0.962761	0.930105	0.8225	1	1	0.927692	1	1	0.916316	0.822619	0.940662	Blue
MOZ	0.65719	0.737615	0.341388	0.426316	0.49125	0.824782	0.72421	0.775385	0.372202	0.312363	0.747474	0.437131	0.583599	Beige
MRT	0.962581	0.650369	0.322085	0.6	0.50125	0.88678	0.956842	0.92	0.984307	0.482421	0.89379	0.463158	0.715726	Red
MWI	0.790081	0.553846	0.456792	0.417263	0.61125	0.609951	0.870526	0.878462	0.315152	0.117895	0.955579	0.528584	0.572825	Beige
MYS	0.841909	0.828354	0.81654	1	0.59625	0.93611	1	1	1	1	1	NA	0.938927	Blue
NAM	0.584763	0.703708	NA	0.501053	0.86125	0.938436	0.84421	0.863077	0.888242	0.580811	0.96	0.616842	0.783175	Red
NER	0.938906	0.780631	0.218419	0.252316	0.66375	0.752176	NA	0.853846	0.519647	0.199732	0.707053	0.311116	0.499162	Beige
NGA	0.926747	0.7322	0.58636	0.649263	0.6625	0.816661	0.898947	0.836923	0.727755	0.583158	0.854842	0.510583	0.732018	Red
NIC	0.769196	0.918785	0.78093	0.844316	0.28875	0.97096	0.849474	1	1	0.92693	0.875053	0.345263	0.763567	Red
NLD	1	1	1	1	1	1	1	1	1	1	1	NA	1	Blue
NOR	1	1	1	1	1	1	1	1	1	1	1	NA	1	Blue
NPL	0.95942	0.8106	0.732331	0.891158	0.73125	0.858081	1	0.943077	0.965889	0.946316	0.983684	0.628608	0.862403	Blue
NZL	NA	1	1	1	1	1	1	1	NA	1	1	1	1	Blue
PAK	0.977142	0.759077	0.468693	0.807684	0.43875	0.685884	0.916842	0.875385	1	0.780292	0.987368	0.447384	0.730154	Red
PAN	0.716595	0.950708	0.795354	0.909053	0.9225	0.984135	0.973684	1	1	1	1	0.881053	0.943102	Blue
PER	0.835559	0.8984	1	0.912632	0.98125	0.898973	0.961053	1	1	1	0.983579	0.689772	0.910283	Blue
PHL	0.888404	0.904646	0.93041	0.976737	0.5725	0.938994	0.953684	0.953846	0.99953	1	1	0.659803	0.89688	Blue
POL	0.996579	0.948631	1	1	0.8625	0.975854	1	1	1	1	1	NA	0.986601	Blue
PRT	0.950106	0.912154	1	1	1	0.973425	1	1	1	1	1	NA	0.988348	Blue
PRY	0.776419	0.869631	0.806037	1	0.72125	0.991652	0.955789	1	1	1	1	0.89418	0.942198	Blue
ROU	0.917693	0.944615	0.971076	0.910526	0.87875	0.935451	1	1	1	1	1	NA	0.966199	Blue
RUS	0.893243	0.842646	1	0.93821	0.335	1	1	0.987692	1	1	1	NA	0.943402	Blue
RWA	0.804142	0.525339	0.386179	0.886421	0.2975	0.543843	0.682105	0.926154	0.505206	0.424933	0.870737	0.630633	0.61685	Beige
SEN	0.853068	0.789508	0.522598	0.766316	0.91375	0.764016	0.973684	0.913846	0.954363	0.741053	0.907895	0.682528	0.803742	Green
SLE	0.918712	0.592215	0.455266	0.561263	0.68	0.678644	0.776842	0.813846	0.778294	0.238947	0.752105	0.490692	0.623498	Beige
SLV	0.874589	0.932385	0.836057	1	0.8	0.849323	0.963158	0.998462	1	1	1	0.878947	0.923166	Blue
SOM	0.902537	0.718145	NA	0.580737	0.19	0.660463	0.426316	0.764615	0.308145	0.517895	0.861158	NA	0.575853	Red
SRB	0.994985	0.935061	1	1	0.45125	1	1	1	1	1	1	NA	0.96717	Green
SVK	1	0.973985	0.973332	1	1	1	1	1	1	1	1	NA	0.997119	Blue
SVN	1	0.993954	1	1	1	1	1	1	1	1	1	NA	0.999767	Blue
SWE	1	1	1	1	1	1	1	1	1	1	1	NA	1	Blue
TCD	0.809697	0.670062	0.235819	0.179474	0.335	0.711613	0.718947	0.8	0.727548	0.0884211	0.634842	0.189474	0.440864	Red
TGO	0.813484	0.631815	0.57588	0.475263	0.46625	0.598558	0.837895	0.864615	0.757159	0.551191	0.78379	0.630714	0.665851	Beige
THA	0.930633	0.920723	1	1	0.25	1	0.966316	1	1	1	1	0.970196	0.9418	Blue
TJK	0.942918	0.840954	0.925207	1	0.21	0.977581	NA	0.953846	0.988268	1	0.888316	0.849071	0.880697	Green
TKM	0.845615	0.779446	0.898331	1	0.18625	1	1	0.955385	NA	1	1	0.960457	0.914059	Blue
TUN	0.959773	0.707154	0.928464	1	0.9125	0.677321	1	1	1	1	1	0.966913	0.902278	Blue
TUR	0.82987	0.761169	1	1	0.36125	0.879618	1	1	1	1	1	0.903936	0.91542	Blue
TZA	0.850125	0.557415	0.339538	0.526211	0.47125	0.763631	0.788421	0.9	0.579481	0.396418	0.755263	0.599902	0.644636	Beige
UGA	0.817804	0.713308	0.244595	0.389368	0.375	0.894986	NA	0.895385	0.60834	0.434737	0.864421	0.455778	0.612704	Red
UKR	1	0.749969	1	1	0.61125	0.980807	1	0.989231	1	1	1	1	0.969937	Blue
URY	0.861764	0.989446	1	1	1	1	1	1	1	1	1	0.999504	0.994635	Blue
USA	0.837031	1	1	1	1	1	1	1	1	1	1	NA	0.993181	Blue
UZB	0.924731	0.950585	1	1	0.23625	1	1	0.995385	NA	1	1	NA	0.936792	Blue
VEN	0.788993	0.752646	0.943832	1	0.26125	0.986302	0.764211	0.990769	NA	1	0.992947	NA	0.877192	Blue
VNM	0.918349	0.832431	NA	0.964737	0.27	0.941769	0.982105	1	1	1	1	0.991937	0.928003	Blue
YEM	0.904184	0.562754	0.511838	0.616421	0.145	0.966714	0.574737	0.884615	0.844182	0.765801	0.927474	0.587368	0.703819	Beige
ZAF	0.528199	0.762523	1	0.972526	0.89625	0.941911	0.98421	0.864615	0.837001	0.894737	1	0.798083	0.899535	Blue
ZMB	0.612342	0.626677	NA	0.534	0.4225	0.708771	NA	0.836923	0.406819	0.452632	0.743895	0.528308	0.606134	Beige
ZWE	0.710622	0.483815	0.500739	0.687474	0.36	0.843514	NA	0.816923	0.634163	0.492437	0.810105	0.819331	0.703923	Red

## Sheet: CF
Carbon footprint (tCO2-eq) 2019	Administrative_services	Air_transport	Alcoholic_and_other__beverages	Aluminium_ore	Animal_oils_and_fats	Arts__entertainment_and_recreation	Basic_aluminium	Basic_Copper	Basic_Gold	Basic_inorganic_chemicals	Basic_iron_and_steel	Basic_lead_zinc_silver	Basic_nickel	Basic_non_ferrous_metals_n_e_c_	Basic_organic_chemicals	Basic_petrochemical_products	Basic_tin	Beef_meat	Building_construction	Cement__lime_and_plaster_products	Cereal_products	Chemical_and_fertilizer_minerals	Civil_engineering_construction	Clay_building_materials	Coke_oven_products	Computers__electronic_products__optical_and_precision_instruments	Copper_ores	Crustaceans_and_molluscs	Dairy_products	Distribution_of_gaseous_fuels_through_mains	Dyes__paints__glues__detergents_and_other_chemical_products	Education	Electric_power_generation__transmission_and_distribution	Electrical_equipment	Extraction_of_salt	Fabricated_metal_products	Finance_and_insurance	Fish_products	Fishing	Food_products_and_feeds_n_e_c_	Forestry_and_logging	Fruit_products	Furniture_and_other_manufacturing_n_e_c	Gas_extraction	Gold_ores	Government__social_security__defence__public_order	Growing_beverage_crops__coffee__tea_etc_	Growing_cereals_n_e_c	Growing_crops_n_e_c_
AFG	55.6814	68.1803	0.307732	0.0739679	287.342	82.3285	28.4755	51.7756	0.039369	0.748232	31.6342	1.998	35.9967	93.2418	0.968707	0.244124	14.4108	432.441	390.203	344.715	789.625	27.57	561.195	106.989	43.2152	54.5411	0.0770408	14.4537	1669.58	1812.77	985.258	177.511	1816.69	165.871	0.0270151	89.2362	1.23107	1.66911	35.0107	21.1261	2473.5	31.432	13.0608	0.0502631	0.160945	389.031	64.2254	334.358	84.3849
AGO	1.49162	47.853	1540.93	0.681357	22.9613	97.4036	11.1923	13.1897	0.1978	1.09252	118.975	3.89077	1.11069	22.0401	0.496087	0.0135249	0.278518	316.628	2761.29	23.2852	344.035	0.533859	2814.97	11.9368	0.267705	222.472	0.104564	67.8269	166.129	1211.98	83.2714	209.006	9.13377	192.669	0.454855	608.684	668.852	93.9908	7.50596	121.634	3127.75	13.6355	128.732	0.00863465	0.199436	4810.33	1263.18	0.265507	0.0126526
ALB	6.35615	37.4263	104.259	0.150977	22.2437	13.1864	8.43099	2.40528	0.0767668	1.56647	13.1215	8.4902	0.680294	1.92933	1.95363	1.84915	0.468154	97.7704	703.21	106.74	57.9456	0.290495	1046.57	144.338	4.40439	69.7338	0.0755864	50.4979	335.842	218.234	429.698	24.271	142.934	123.754	0.0201858	11.7731	3.73708	4.88641	85.0381	2.48262	15.5225	8.24396	28.1316	0.0470631	0.0782663	49.692	28.9226	0.143336	0.0842904
ARE	23.6789	6202.97	78.6537	0.934372	260.089	347.458	64.2395	389.452	2225.26	311.687	136.166	288.319	66.4059	236.73	191.118	2.98912	7.53137	1748.15	9654.83	15.2449	2196.15	0.233635	16125.6	11.1196	8758.43	992.774	0.775306	0.585171	9114.79	404.134	151.357	898.828	1522.09	682.606	0.411795	4780.44	917.162	1057.25	145.608	388.339	17.3512	132.408	6305.55	3045.66	1.45895	12981.2	37.6684	0.750215	1.40175
ARG	311.423	1659.84	6667.53	1.74979	1059.37	1248.81	102.928	465.57	34.0811	42.0894	576.057	66.5562	175.944	318.29	57.7318	38.5595	54.4344	50288.2	7857.77	83.852	3558.82	17.4278	8164.25	61.1638	569.345	3048.35	0.039659	422.789	9640.81	2862.94	6808.47	6022.46	16012.3	1789.04	0.073543	1952.33	2039.05	122.044	133.945	1880.34	2034.82	21.342	1541.94	8.7062	0.47401	15839.4	84.9259	1.2836	503.672
ARM	7.31409	110.706	35.5097	0.253047	29.4742	24.2452	2.6273	3.03147	3.09344	11.8788	5.84578	7.90534	13.1909	2.17147	1.45033	0.722061	14.559	42.7721	192.502	236.999	111.906	0.945849	797.72	50.8801	0.762949	55.7676	0.297887	0.430365	240.166	21.0919	197.638	54.4336	504.43	109.082	0.0764488	11.6721	11.7574	23.7802	21.0887	3.49267	12.4425	53.7995	55.9729	1.24268	0.6029	520.843	1.67607	41.8977	1.63966
AUS	1741.33	9261.11	5936.69	49.6129	754.044	4346.33	923.152	1.63286	878.482	76.2331	1220.03	35.4375	2.39106	59.6478	423.311	102.804	7.87627	8051.98	50518.9	202.322	3395.85	48.0627	24961	829.142	730.565	7316.22	1034	893.521	7518.52	47717.2	7340.87	10550.8	46567.1	3918.01	100.829	4416.51	4404.58	3536.64	871.495	824.274	705.752	3259.01	4400.29	1893.57	11.1002	32898.9	63.5331	3.1789	15.0745
AUT	493.006	912.751	1950.22	1.26742	591.367	681.452	231.312	71.4738	16.9731	44.6327	844.072	41.2042	40.0504	213.765	86.7365	50.1702	15.3727	395.308	3918.55	514.375	639.489	7.26116	3998.59	674.569	526.335	2062.09	0.701679	21.4778	2138.49	5028.1	1623.26	1479.04	4176.81	2366.55	12.1039	1475.8	674.137	574.55	25.682	78.6067	26.5625	69.7439	4023.57	3.26737	0.877721	2333.8	65.5844	9.32605	6.46811
AZE	27.6749	1498.2	831.845	2.23979	40.3336	94.2362	28.4038	517.01	0.581865	789.228	19.1349	2.08088	10.3432	39.8399	3798.88	112.159	1.98373	262.723	1018.86	16.3535	394.358	0.807356	1141.47	96.0882	3.86421	135.257	6.11291	1609.61	507.411	8995.78	781.425	170.244	438.434	187.826	7.86875	129.255	9.87234	31.9011	117.465	57.703	2.31634	45.9673	104.276	0.0811338	5.64751	798.905	19.8834	240.571	7.05674
BDI	4.14148	22.1601	43.7551	0.0647561	5.98774	11.6399	3.79049	0.660451	0.00440062	1.03742	13.1321	0.379137	0.49304	0.0749846	1.61786	3.33864	0.168183	42.0148	48.0624	111.803	19.958	0.191703	55.1944	69.7771	0.223928	11.0872	0.0691994	0.336493	56.5838	75.5778	7.84182	26.5286	105.804	26.541	0.0321595	2.45656	2.84156	26.1569	40.8504	0.913074	60.9312	9.6433	30.7866	0.00470358	0.281679	79.7514	0.0138731	12.2144	0.0454465
BEL	1090.3	1062.52	3100.19	3.05582	317.883	858.039	101.186	28.0586	34.9582	72.1485	261.172	31.5553	90.2208	48.2118	51.9018	41.7958	99.2065	596.332	7373.91	349.353	870.993	18.7851	7540.78	230.26	1327.32	1926.86	33.6623	38.8299	5809.45	19542.4	1359.04	1257.74	8956.46	1922.8	4.0361	2544.65	1590.45	1144.63	65.5645	206.351	157.023	52.989	4022.1	1427.11	148.261	2986.99	371.293	8.2452	5.04173
BEN	75.1015	6.36248	96.8386	0.160515	28.713	24.5024	7.62513	2.28334	0.0672282	16.8438	2.55918	2.16995	5.46295	6.40903	12.5557	18.0233	0.587605	66.2235	687.063	187.129	22.5135	8.29846	854.83	305.069	0.483104	26.7355	0.184263	0.809076	28.2023	140.668	222.068	122.525	220.944	191.588	0.0469837	31.2456	1.95267	45.7761	245.372	1.0364	21.2859	7.27572	61.7134	0.00892818	0.439469	127.006	0.0343786	0.0674879	53.6426
BFA	6.52503	74.4766	726.478	0.301644	16.7805	30.0052	5.89539	5.74445	0.106136	30.3444	13.9541	1.05718	1.07612	5.84157	5.89254	1.25271	0.302031	208.28	450.096	22.2031	145.439	0.237095	434.882	34.3695	10.4429	119.729	0.314388	0.483676	116.515	307.252	278.654	78.1877	832.652	158.365	0.212799	205.159	3.35956	37.347	189.989	3.85674	0.334208	49.6581	256.948	0.00862266	0.596899	366.874	27.7747	465.289	21.0964
BGD	38.736	38.2522	0.827856	0.741874	8.5899	53.4619	464.396	156.781	44.6727	6.95674	1394.76	208.521	123.887	359.383	6.25869	163.039	37.5747	743.893	34157.6	6886.31	382.857	4.48142	11344	35.1273	52.0833	4298.53	0.302807	17.3012	1305.8	18444.4	3123.7	763.056	11275.4	6245.55	0.167862	541.847	253.27	942.574	10770.7	445.025	1892.19	165.447	1415.01	6.17114	0.229858	1438.4	128.104	1718.88	45.87
BGR	250.223	328.872	728.049	1.92791	82.9233	215.988	23.6715	5.44096	7.6699	17.0563	27.2601	10.9764	7.85758	15.324	11.5719	87.491	8.27968	97.5412	1530.97	150.197	298.018	6.00523	1344.6	191.747	52.8209	297.611	0.870167	0.773085	769.354	6774.23	408.203	114.346	4289.23	560.155	0.0916704	499.302	83.6374	78.4054	6.6276	106.285	13.9739	21.0339	400.39	0.221372	0.0716191	987.126	79.6703	160.607	10.9901
BHR	4.41005	231.057	7.86626	0.125115	25.9218	181.455	33.3331	59.6977	279.212	3.34039	49.8654	32.0379	88.4632	700.216	4.34523	9.90494	20.4612	606.104	1149.22	110.573	1392.93	1.01886	1450.24	31.9459	1365.13	266.441	0.210901	1.01695	791.776	57.5498	19.7964	808.487	31.863	978.933	0.0554727	135.632	118.102	49.3808	1.03599	121.436	45.8256	298.368	238.221	0.0117355	0.444015	3634.46	2.2668	1.26321	6.82049
BHS	1.15992	9.7095	140.669	0.255497	10.5367	36.7091	1.06895	0.457841	0.108584	0.186917	3.0551	0.28978	0.064983	0.252507	1.78232	0.0297538	0.0343758	29.2572	347.047	5.23639	23.5534	0.290294	439.462	2.18429	0.27907	14.229	0.31698	0.0758348	67.9588	6.82428	2.00151	82.169	34.3364	19.6277	0.0363771	0.799296	28.4889	23.7955	0.0186557	16.7662	0.793595	5.48337	6.56329	0.00954591	0.516625	384.907	0.0537345	0.0673889	0.34923
BIH	1.14104	15.7365	404.681	0.0504081	3.68876	154.119	2.52562	4.06714	0.0264699	15.4493	13.7894	1.32045	6.10854	6.00903	4.31238	3.44497	0.339226	87.7629	971.914	49.9229	110.576	0.932339	874.738	48.314	2.39761	109.638	0.0542719	1.59094	531.88	2407.15	192.569	341.698	4314.5	160.172	0.558924	73.2085	86.3526	14.3935	70.0009	85.3576	19.2632	1.52937	110.076	0.591101	0.123841	1076.56	132.742	0.137009	0.0167615
BLR	207.107	739.602	5898.45	0.139979	60.0236	135.58	9.48899	60.9169	61.6225	0.188531	24.5812	46.7092	51.3021	326.025	0.161963	0.552637	15.7133	689.419	1825.79	10.3365	1237.81	7.19226	2171.62	5.72962	1909.7	200.252	0.103249	0.0698859	1278.97	6324.5	199.048	290.99	244.345	1049.21	0.248668	248.688	44.2011	80.66	17.3726	8.72975	6.63809	0.0777175	150.43	14.4405	0.153138	431.636	572.687	478.026	102.588
BLZ	4.19759	4.76552	110.49	0.159908	16.3666	15.8573	6.60663	0.717139	0.00916581	1.56598	8.05424	0.424012	0.290765	0.173791	3.13683	0.197222	0.095977	27.7909	83.6271	1.39495	9.34082	0.0898147	142.804	3.06311	0.213259	3.37571	0.384431	0.0719789	32.8999	182.21	3.5877	26.4105	4.69764	3.01696	0.0435335	0.859338	1.30766	8.21603	0.0230608	19.3482	0.198271	2.17679	5.38692	3.58071	0.097619	218.673	0.0383034	0.605427	0.879147
BOL	8.85633	7.66307	287.144	0.127061	760.192	62.0433	265.715	7.45735	0.233088	5.54373	609.958	3.25413	2.92248	1.9254	14.6695	1.41648	0.504656	5238.12	2162.27	332.466	634.689	3.02422	2693.58	20.4356	25.7827	250.306	0.164113	0.271134	2161.35	38.6877	1313.7	641.833	2257.19	620.907	0.202937	171.9	3.04167	71.0216	11.6607	79.7445	103.386	59.7074	144.1	0.0158203	0.390625	4527.96	212.921	933.735	3.67531
BRA	1972.79	7952.12	9267.71	1.32055	13775.4	2861.12	891.436	903.612	217.595	1127.13	1463.22	828.679	779.045	1946.11	276.78	126.791	294.389	37884.1	52574.7	1101.9	9775.44	458.064	55785.3	10.8293	561.305	11754	1.0374	990.767	20475.2	36853.3	1544.54	14663.6	47510.4	13429.6	1.66779	9096.41	8577.55	3506.95	4419.53	1363.96	386.806	4404.18	15643.1	153.393	1.45288	25091.1	3494.62	2509.93	5.17553
BRN	10.7094	66.3116	4.61916	0.0537781	13.0339	18.432	15.4085	13.452	0.781028	3.28681	233.679	3.87038	4.58345	8.48495	0.904539	0.532365	0.870114	107.865	698.692	190.936	308.111	0.577874	611.591	27.9632	139.341	78.5358	0.475151	1.52913	264.406	1014.54	8.52193	222.822	279.487	71.923	1.17362	52.3222	236.974	4.73257	1.95812	2.81974	17.8151	4.65042	118.281	5.74965	1.60021	1713.68	0.494731	0.679034	1.68914
BTN	7.97948	599.664	1.33811	0.681426	15.6225	4.72805	6.6443	1.81874	0.393772	0.0126684	4.72929	0.237118	0.188391	37.9844	2.31508	0.0605631	0.0294974	133.771	294.394	2.07041	27.6455	0.103673	386.186	2.93825	1.09922	14.3697	0.437994	56.2013	201.988	146.584	64.8452	30.846	149.047	52.9333	0.0181174	25.1859	17.9587	1.43879	0.682121	2.49036	6.6009	1.59173	25.4322	0.0252357	0.199021	370.174	0.901198	0.0929699	0.312572
BWA	1.16164	70.6455	154.776	0.0515112	8.10033	30.6527	16.99	0.715572	0.0935249	1.12444	3.61658	4.22287	0.0267753	0.17352	7.31135	0.0588022	0.370883	8.14651	1364.98	94.8169	242.32	0.171102	1282.99	15.2505	50.4395	190.704	0.195709	1.24793	353.195	345.342	39.6231	74.978	103.019	461.735	4.20394	241.52	200.566	6.76708	0.320842	13.2415	20.1531	82.2271	230.503	14.1039	0.217874	1072.87	11.634	106.122	5.21271
CAF	0.593557	5.71004	19.6607	0.0511731	2.48369	51.0572	0.574548	0.0951988	0.00231343	0.169019	2.48131	0.0684971	0.0616476	0.397397	2.38233	0.0164974	0.0158687	119.742	24.2211	22.6891	9.47999	0.011687	24.7318	1.32863	0.165052	45.6329	0.083258	0.206523	9.0542	0.585095	3.08369	107.722	0.490153	58.9211	0.0140199	63.2611	33.863	12.2758	1.11685	1.23772	3.2305	101.268	4.77488	0.00444757	0.204673	191.369	131.481	0.0306065	0.0890177
CAN	1309.53	6636.93	10461.1	1.07	2612.26	3858.18	82.0367	95.3652	55.2335	119.791	265.399	176.689	87.2512	364.171	125.656	76.3313	77.8667	3856.06	46055.1	2802.23	2162.77	114.876	42365.1	4088.96	2447.74	7763.47	0.423844	623.598	10768.8	99334.3	6063.14	11555.6	23718.7	5986.56	1.32802	4107.01	8543.19	1869.94	165.554	1638.94	69.7238	2635.29	10393.1	175.451	2.04068	26026.5	515.16	63.6391	2.74056
CHE	544.09	1566.24	7290.55	1.49708	516.963	949.434	15.9176	112.682	182.323	12.3962	37.5624	14.6713	26.1156	40.0226	47.0597	24.9983	26.0227	934.589	6658.77	203.039	1483.83	20.1012	6083.03	68.4559	132.526	3779.61	7.21989	13.0481	2635.99	6165.04	809.618	635.769	3901.61	3506.46	0.303127	577.085	1419.69	1536.23	40.9599	12.7902	115.405	39.1488	3932.46	9.79178	1.32797	6443.82	352.412	5.14937	1.17682
CHL	133.892	1579.47	3396.9	6.70112	81.6817	336.041	664.685	11.4461	13.8642	60.3871	564.397	14.0083	147.597	132.292	91.9262	53.6917	14.3825	4323.85	7847.3	389.167	1371.33	46.2913	8317.87	208.354	328.317	2010.56	47.4523	433.026	3986.71	2340.71	2910.61	2978.61	13679.9	1294.28	0.166145	2175.6	1008.44	113.207	8.22558	91.2116	268.814	54.2574	1574.59	67.5859	7.32787	5424.3	128.674	12.1082	43.3788
CHN	79732.3	30099.2	48197.3	538.45	11874.4	30751.6	838.394	982.321	628.681	774.656	684.454	831.338	1067.09	1060.6	1814.02	1519.86	652.136	22337.1	2.4544e+06	2732.23	32190.3	411.556	1.63573e+06	2863.66	4629.45	210819	962.482	1348.04	48974.6	1.99987e+06	44665.4	108030	862893	239813	239.921	38009.2	32264.5	51890.8	27387.7	8676.27	12754.4	134388	80551.7	116.283	2217.01	226211	14015.3	10937.9	8574.92
CIV	9.08758	189.469	72.3539	2.59672	2.8653	38.3857	4.63711	7.26401	0.35535	18.9952	44.6433	3.49441	1.36338	95.0267	6.40367	5.71059	0.658862	141.329	928.342	1290.36	163.336	4.30418	854.561	2241.85	45.0972	1171.02	3.1807	12.3293	136.631	1882.12	656.16	47.2968	1565.25	462.209	3.37394	573.499	7.91002	408.448	236.233	217.805	384.872	52.505	93.7781	0.51779	8.51337	106.994	118.559	14.1018	159.018
CMR	14.6214	203.69	645.322	1.27592	247.85	40.6941	0.909643	2.44233	0.174147	4.30664	4.82121	1.76725	1.88668	11.1781	6.0243	3.76223	5.99126	59.2077	1844.84	52.4273	200.865	0.48579	1530.46	4.56686	10.2903	188.483	2.81479	19.0205	107.657	3311.14	897.042	124.196	1518.89	338.116	0.34959	105.033	20.0606	66.8877	244.848	22.7159	1.34987	42.6979	137.478	0.00840737	1.98383	1025.59	153.048	141.131	311.357
COD	73.6957	41.2919	903.306	0.132649	29.8533	110.503	2.68261	0.78578	0.330671	1.23815	11.582	7.2341	1.27896	1.66226	33.0506	0.382275	1.25429	21.7676	1428.56	1656.22	383.278	22.4577	1063.86	527.092	23.8794	200.251	0.157726	8.44731	15.2247	1212.42	787.348	1117.57	158.421	494.591	0.136334	41.0973	10.6394	281.155	294.027	3.32904	3685.76	78.1829	125.522	0.010482	0.380172	1381.58	518.133	264.29	7.58329
COG	1.2868	28.2385	45.32	0.899314	2.3001	129.016	3.50889	2.50416	0.0275113	1.4772	7.88644	4.27777	1.89278	1.54427	0.762306	0.66305	8.28321	42.4832	1204.21	109.956	59.8752	2.84881	1216.33	3.3718	8.86407	61.1649	0.0587483	1.07159	48.7544	512.029	396.596	408.401	144.851	115.949	0.0647892	57.737	9.89862	75.8344	462.51	12.6876	74.3815	9.20434	35.2179	0.0862913	0.122956	691.101	22.0139	0.0960902	0.0618084
COL	111.589	786.322	1927.35	0.248988	289.37	738.08	16.7184	16.0373	2.5809	109.001	45.4283	21.7265	15.361	19.1608	33.553	33.3232	20.9418	10706.9	9499.01	66.2436	954.861	96.3334	18761.3	106.88	796.053	2424.51	0.0355323	387.63	7607.02	2216.82	5187.9	2777.59	6979.63	927.288	0.0773407	1330.76	1285.8	182.759	6451	242.597	613.9	17.4718	2325.22	10.1201	0.0338223	14870.7	3686.98	58.3155	148.05
CRI	29.1674	310.353	572.121	2.10618	122.927	39.5557	22.2806	36.2818	3.00281	34.3099	74.2192	5.33537	15.7588	56.9988	59.5765	4.84671	8.74733	217.111	1565.41	46.4353	190.633	15.8252	1907.42	97.9192	104.049	145.488	2.67985	11.9081	893.711	95.9318	560.685	396.15	12.7152	217.879	0.0596517	184.68	88.694	160.121	0.947933	19.8962	7.16251	275.233	236.291	0.0580175	0.0257337	377.471	4.10538	0.42364	45.6148
CUB	0.965663	15.0745	1190.61	0.907038	421.954	626.605	13.3503	4.98879	0.436752	39.6176	30.9998	3.63967	0.558414	16.3867	1.70668	0.357273	0.795837	1173.62	727.951	11.9425	425.833	1.91423	1042.33	302.93	994.318	115.4	0.158237	3.87789	824.973	35.7629	460.826	2439.05	43.3255	340.678	0.0864052	428.895	41.0404	66.4149	4.78793	0.550451	1141	59.6582	200.629	0.00716843	0.410161	8112.24	803.943	0.0566442	16.3511
CYP	14.9691	552.9	329.649	0.636277	31.1611	240.987	2.24142	1.58038	1.61206	1.41052	15.5662	1.8015	2.49176	2.06473	82.8177	16.0432	0.962504	71.3999	389.507	28.3866	109.644	1.63893	417.055	107.045	58.2575	83.808	2.28653	0.166109	207.322	1473.51	163.699	103.562	32.9033	113.143	2.02375	172.493	97.9203	68.4518	1.07044	56.8545	20.2131	86.5834	116.721	0.458617	0.814052	318.816	18.0455	13.3203	5.46903
CZE	595.337	344.242	3307.81	2.67736	571.844	765.048	81.381	33.4664	8.45488	12.3797	266.695	10.5713	28.0257	45.6433	9.69463	23.6211	11.7577	283.001	3314.91	201.134	439.669	169.159	3295.95	138.406	63.9323	2668.99	10.9593	15.1175	2087.79	32419.4	1023.2	1405.04	3544.09	1399.42	3.8404	894.767	427.051	255.438	3.42895	64.1405	107.929	32.5593	1635.97	3.84805	2.23874	2773.27	81.0698	16.0936	1.15501
DEU	2732.8	10645.5	20675.1	5.58457	2043.71	4757.61	1180.02	412.182	144.517	671.944	3585.23	300.812	246.025	1217.93	420.651	520.133	144.781	4112.84	30679.8	5223.01	6355.1	212.352	26152.5	3396.6	2652.83	23424.5	75.6621	92.2027	21771.2	132874	12743.5	6982.08	58844.5	16548	6.95828	16455.7	7740.52	3168.91	127.474	86.6942	1257.84	956.578	23330.9	206.53	71.854	24187.2	5273.9	856.425	31.7745
DJI	1.86769	20.9037	15.4065	0.204608	4.64134	10.6552	2.14517	8.04242	0.853977	7.62143	21.2533	13.2986	0.614538	2.6743	6.07105	0.305954	3.08227	23.9025	21.7963	112.002	81.063	0.369705	28.0154	13.3606	2.58851	22.6686	0.217027	0.010678	58.2676	36.5532	22.5408	38.7425	91.4849	98.8412	0.0746451	70.6614	0.928186	2.05205	12.618	10.8929	12.5978	1.51326	23.6652	0.00962209	0.375734	115.414	3.57394	0.131247	0.0254117
DNK	801.462	627.509	1227.68	1.27372	7646.72	683.446	18.2236	5.01056	9.02744	11.0849	49.508	16.2324	20.7197	8.08199	17.7321	16.279	7.77702	219.343	4675.12	113.398	211.407	55.8236	3233.99	63.8328	333.174	989.617	8.10143	17.5905	1124.33	8026.15	615.638	1288.62	3877.18	669.972	1.2006	521.16	455.176	177.008	37.2805	296.541	15.7107	28.5759	1425.71	0.916864	1.74524	1435.85	77.7949	167.55	17.6401
DOM	0.887774	189.582	1068.6	0.588882	83.5355	87.6654	8.46756	1.23369	0.0796456	12.5324	40.5872	5.10462	0.805473	4.47861	8.3062	0.0182223	0.389161	812.427	1018.28	42.1171	103.77	0.221727	1575.84	60.3009	23.5983	134.515	1.02465	19.0017	1443.48	5.94224	19.2319	333.089	134.988	1052.05	0.125153	736.46	148.798	64.1427	3.66074	190.775	7.27053	87.9694	211.437	0.291845	1.0876	794.4	47.0418	9.12445	31.907
DZA	2.10189	3375.79	256.857	3.91927	38.5028	188.038	636.689	421.214	33.1005	14.8557	2590.67	68.1434	99.933	317.353	55.3312	10.036	25.79	422.735	36211.4	2826.95	1136.02	6.37122	25395.9	1321.6	1184.01	1777.76	4.65637	155.475	2541.59	119.391	144.526	496.171	77.0861	2644.21	0.517183	10358.5	394.896	84.7575	120.176	231.227	75.0363	97.7637	335.308	0.0104697	6.79997	44677.4	300.411	7.33006	129.057
ECU	6.95181	1018.08	230.813	1.75826	346.262	9.52372	53.0359	20.8134	0.0289847	3.91811	394.957	6.0447	2.91157	93.4771	10.9659	0.841277	0.949007	500.482	2400.98	621.048	190.578	1.05817	3751.41	47.08	0.472906	1180.07	0.11757	1.13452	4625.49	4763.36	123.019	1841.2	5.9027	1095.21	0.271929	1973.01	925.207	85.1264	1.24171	145.776	36.6581	29.4293	494.788	0.00704731	0.308048	5037.88	34.1718	1.07568	57.1671
EGY	67.0331	1035.06	61.796	411.322	93.4255	1109.7	9.66706	126.253	47.0141	1.46369	6189.63	22.0047	138.385	515.446	52.1926	38.2027	39.5542	1899.92	3387.89	13478.1	3773.9	426.772	3420.54	5376.6	73.682	958.471	0.28168	64.4552	2552.75	11448.4	7360.48	5770.49	49931.8	3770.29	125.123	4049.77	133.874	1140.73	2960.45	286.207	1395.91	1730.75	1329.01	2278.5	0.31031	9054.22	430.626	839.496	399.635
ERI	0.397113	2.03734	55.0372	0.0497704	93.7164	59.318	3.12905	0.381383	0.00431796	0.0356501	3.71834	0.476905	0.225174	0.445737	0.345448	0.00722035	0.0695959	70.522	11.3664	2.87277	91.1111	0.00847407	39.3365	1.6316	0.162939	0.305794	0.0481746	0.0500355	408.442	1.32404	0.144381	191.682	0.693174	2.63518	0.0108099	1.5236	44.4866	3.55404	0.00687398	16.6192	190.677	0.936787	0.258067	0.00279707	0.148058	563.151	73.3895	0.0306702	0.155977
ESP	1610.81	3223.22	7571.98	4.98751	129.539	3052.99	129.751	67.158	35.8796	84.6681	512.069	46.2182	44.9756	90.0554	76.5955	92.5542	19.7385	2323.89	13102.9	776.042	2045.85	85.1751	10879.1	227.648	2205.46	3638.08	5.01583	666.173	9590.02	28029.5	4452	3103	13047.2	4201.36	22.5905	4559.68	1823.62	4273.44	972.623	695.151	593.199	69.2011	6435.5	6.71273	1.23858	7727.09	956.746	39.9155	52.5575
EST	51.5086	109.585	675.542	0.0878136	22.3755	183.581	4.10583	1.9971	0.500743	7.74231	10.1982	0.759616	0.687018	2.87757	2.70174	17.0258	0.781561	56.7704	912.277	33.681	50.0268	2.87383	877.223	17.2019	1086.22	195.945	0.26222	5.22153	148.527	4462.37	163.835	294.163	1483.48	161.254	1.1905	131.74	58.3903	33.5854	4.60432	16.85	3.5774	7.328	275.317	0.785816	0.281424	477.542	9.47602	1.73003	1.72945
ETH	445.861	192.56	261.365	0.214807	1350.87	42.6288	169.846	203.652	30.1543	219.384	1282.74	65.8798	22.6017	87.2769	284.776	31.5386	3.12262	555.391	471.559	1755.86	16730.5	1.37688	3345.83	1239.59	380.547	755.491	0.164851	37.2398	1912.99	34.5352	1087.41	141.897	1014.6	828.43	0.547963	805.809	44.372	58.8142	15.9888	8.21214	403.533	603.542	153.693	3.14637	0.166461	558.922	8497.28	2786.03	222.462
FIN	333.062	442.238	2452.48	3.1701	72.7482	1350.84	26.8863	7.35731	5.03368	22.2036	144.802	27.1512	5.52606	18.8089	22.0069	16.4161	12.9023	404.323	5846.21	471.224	438.542	5.11092	5324.21	322.814	853.981	1290.98	3.634	0.924494	2030.67	11744.5	571.809	1299.39	7535.56	955.973	0.563079	823.677	718.453	534.991	45.5586	23.2267	59.2753	48.9027	1073.69	0.567541	1.13747	3473.57	296.457	90.2954	7.77792
FRA	2219.36	8358.33	15254.9	4.42713	6489.45	5575.72	135.814	39.7043	86.6709	40.5379	190.126	26.7395	122.624	92.8265	249.128	47.2876	49.7701	3659.11	26648	3105.22	3803.91	28.6438	27833.3	1524.29	2855.94	8711.43	2.3966	489.394	11621.2	56939.6	7578.45	6011.44	2732.9	6805.25	4.66151	5093.27	4096.16	4610.71	270.2	137.629	720.449	2982.59	18653.2	98.2531	1.66564	14995.5	849.414	281.075	87.6871
GAB	1.20095	35.1911	481.53	0.0666628	5.51502	93.0739	13.159	1.30347	0.0128649	0.195933	1.98013	15.8321	1.05514	0.581316	0.214467	0.417164	0.78934	58.4065	783.829	24.5617	172.787	0.0540715	709.781	3.74737	1.56389	339.179	0.060393	1.45751	157.693	195.599	212.532	409.549	217.626	117.347	0.0195881	87.4861	63.4973	52.1506	309.352	85.6203	27.6688	11.6598	29.4409	0.00692469	0.153035	850.677	2.65153	0.0341241	0.110462
GBR	4387.04	11418.5	9930.53	34.1434	1004.58	6516.08	199.007	109.838	46.443	73.0148	604.954	39.8746	180.47	124.227	146.712	47.947	114.042	1474.12	18035.9	1293.96	4832.23	74.4754	22161.5	3101.76	178.003	8496.24	29.71	172.452	21540.4	44060	7976.77	9915.01	32429	8003.2	2.34355	8199.71	9758.04	2557.78	72.2603	2520.27	650.12	245.705	15121.1	10.72	64.8031	20575.6	1211.59	987.686	119.801
GEO	1.17521	56.9853	350.183	3.81946	43.5841	38.3426	11.1271	14.3947	0.61536	5.48649	11.8883	5.6285	3.14113	39.1213	3.36856	1.00899	4.56567	193.816	870.755	449.663	195.298	0.800597	1352.75	57.661	143.297	187.824	5.68082	0.008342	1099.14	39.5832	16.2372	75.5943	6.67109	213.781	0.0367919	56.8365	183.788	28.868	9.28926	14.8889	74.981	0.392499	64.3048	0.011458	0.319196	301.908	1.45781	3.11333	0.0221631
GHA	29.5189	248.016	103.412	1.15819	7.75384	152.623	42.3562	117.118	0.398601	3.13341	185.157	6.36241	11.2058	63.9734	22.55	75.7212	10.4797	144.629	2760.76	520.354	264.583	0.944211	3031.16	28.1699	15.1425	588.813	0.699348	8.03394	114.989	555.829	2080.14	2064.65	2480.77	1326.56	0.161221	582.436	78.2604	77.6722	1218.68	388.084	238.116	332.273	557.802	7.80456	0.427151	1048.77	27.5911	51.5712	90.9483
GIN	62.5609	62.737	23.3711	0.075313	16.0344	57.0959	2.19862	3.7101	4.47328	0.461491	8.52997	1.94804	0.655736	0.509195	4.14173	2.1783	1.26392	257.232	52.188	528.956	216.323	0.385524	215.447	271.539	1.9482	80.4641	0.0712074	0.730412	164.075	21.7447	430.12	125.633	166.792	194.023	0.0258542	83.8189	31.0672	11.4361	223.445	30.4353	750.404	143.067	49.7668	0.0178276	0.164121	408.197	25.4205	196.152	8.42268
GMB	4.37388	2.70793	8.64704	0.049741	0.154707	2.50612	0.741953	0.232489	0.0125316	0.162485	4.38077	0.188621	0.0357604	0.0438644	1.14745	0.065675	0.266534	83.227	52.2313	25.1983	74.9121	0.0187407	266.356	1.56951	1.6991	7.38966	0.0792262	13.8759	136.659	31.5596	29.336	13.78	77.7688	2.38224	0.0123018	10.6358	2.78669	7.72288	67.668	9.00466	19.5557	2.236	5.92447	0.00413994	0.17354	45.5212	8.22397	17.4667	0.0372192
GNQ	1.20501	10.4639	248.076	3.02304	51.53	73.4896	2.82151	3.18451	0.0193818	1.14159	4.6987	3.22885	0.619374	0.955278	2.4314	1.44963	0.0456612	163.177	99.9966	47.4677	97.4935	0.165812	93.0339	14.4651	1.41225	279.507	1.84734	0.247084	172.872	42.6585	21.0536	291.918	9.05909	34.2464	0.240944	530.026	478.739	31.6847	3.17681	23.0903	2.89579	50.2679	30.5466	0.00940396	1.58683	433.217	0.24096	0.984683	0.0513808
GRC	669.284	1329.3	1274.3	1.93455	193.346	380.408	11.7816	10.4455	5.87628	9.20069	19.961	9.42547	11.6978	48.5388	12.2312	26.4296	9.26363	388.862	1697.46	119.756	443.234	68.3866	1912.22	141.457	1194.76	590.251	0.769254	61.8191	3278.41	14044.7	1143.05	570.061	9323.65	569.93	0.876337	492.934	279.372	233.551	44.1287	22.4652	163.157	19.7791	751.658	15.0915	3.51472	2425.78	184.316	24.9016	0.854702
GTM	5.33	104.861	179.607	0.338622	75.9429	588.134	8.58672	4.23573	1.47749	1.80916	7.38185	5.3762	1.47459	29.5668	3.58697	10.0192	0.56631	328.362	1475.71	376.526	472.426	3.3818	1357.37	290.03	0.553482	322.545	0.212833	19.263	541.801	4436.68	1466.39	281.529	5195.2	1319.83	0.717804	343.294	112.328	29.268	16.6169	163.693	255.957	0.896058	236.093	1.78272	0.165871	1099.01	278.064	232.521	13.3785
HKG	152.046	1835.64	2121.82	0.738446	661.022	379.651	85.269	99.06	76.7224	101.843	195.38	133.561	150.845	115.475	118.951	131.483	42.5374	3110.54	2055.65	700.749	896.268	1.78148	2233.77	153.455	1051.63	11596.8	1.03147	157.818	3721.85	1014.6	6308.21	3875.55	4119.21	11516.4	1.17038	2701.3	2072.23	4150.26	163.504	219.676	300.077	563.831	1520.37	3.89879	1.39723	6505.21	130.627	3.22365	10.4707
HND	31.1496	11.0067	274.932	1.09778	51.1439	28.8299	14.9438	20.8191	2.62311	7.75074	4.16989	3.33353	3.379	20.7056	4.8802	0.457806	0.577655	230.731	520.62	11.1188	310.66	0.359461	609.116	58.2875	0.851998	156.786	0.774534	202.082	519.136	60.051	621.975	32.8293	387.387	1330.61	0.772987	16.9027	6.33686	5.34133	27.0219	64.2182	27.9358	29.3749	249.399	2.77635	0.190391	93.9894	15.9999	1.2795	14.9763
HRV	175.223	69.0149	528.654	4.33208	34.9056	239.621	2.78257	2.04196	2.10859	2.3845	14.6049	2.95282	1.91477	9.97802	2.52082	4.66094	0.716503	249.25	1070.5	310.14	97.1473	4.01464	1052	273.113	141.052	220.673	0.0805673	9.92635	362.196	180.865	225.223	240.759	2601.13	365.157	0.0829707	173.243	170.176	60.6546	50.4683	1.13075	41.9703	8.83557	337.677	0.17117	0.0905644	993.174	36.1643	7.97849	2.79466
HTI	1.01161	10.4131	240.983	0.0487132	7.68324	138.881	38.9469	36.0788	0.00665539	0.462967	743.191	3.01669	0.0170003	16.9122	6.10752	0.02507	5.39435	48.7253	870.171	79.0103	79.5456	0.0906032	864.805	117.21	5.93791	31.159	0.0865741	1.31285	134.147	5.83141	31.8662	340.704	25.6493	44.6833	0.0621774	142.185	932.972	15.5438	0.119816	8.00645	35.4617	201.803	14.9764	0.00621099	0.160024	537.969	320.635	55.3436	1.93871
HUN	204.763	786.672	1270.15	0.538036	557.262	707.5	26.3916	26.235	8.93823	8.54485	71.0674	4.72848	9.80897	43.1857	12.5198	29.2984	2.19633	80.4855	2712.54	169.95	696.579	2.02068	3019.88	123.783	505.497	1121.39	0.274855	16.2157	1035.07	11332.6	308.508	714.359	749.31	850.882	0.29131	594.219	234.722	144.343	17.7377	68.2302	37.5142	92.0579	715.616	247.634	1.04353	1462.2	42.3477	51.1913	3.20755
IDN	609.473	17135.6	1739.87	0.0874213	820.27	1491.67	18.2542	8.10235	15.3494	243.183	93.0312	15.857	24.3193	8.52891	431.277	413.888	2.86604	3406.07	143501	41.3889	6439.19	13.2887	81135	100.017	20113.6	9371.74	0.166219	218.154	6542.81	46500.3	18357.2	13968.6	113076	5140.47	0.0229107	4874.56	2354.25	3595.47	1563.64	768.246	495.47	3507.86	4580.96	19.2989	0.382425	26300.2	11105.3	69.1294	711.513
IND	8238.22	11162.9	23093.4	1.02598	2182.93	7592.68	1341.64	1085.71	734.85	722.191	6454.1	825.594	1222.7	5510.08	1114.8	1274.8	991.822	7630.4	270844	520.341	38842.2	55.7216	313032	143.104	9709.74	32775.3	2.99815	16584.5	95234.2	551755	39284.3	26052.5	191892	79178.4	0.278411	22414.6	41901.4	9177.04	268.938	333.269	1122.87	881.455	15261.2	42.3949	0.171384	115828	14963.7	13260.6	4.12188
IRL	398.745	941.886	1109.55	59.8805	227.722	471.585	118.897	23.8916	13.0182	172.124	119.235	15.1334	8.7352	51.162	200.862	58.243	5.65276	443.301	4320.5	309.905	358.859	1.48	4437.12	301.174	240.439	2015.06	4.00503	10.0601	680.679	5599.29	788.786	450.766	327.668	999.953	17.5058	612.964	617.872	138.303	16.2905	28.0686	49.6804	51.2562	2895.92	29.8922	2.4154	1365.5	25.4562	5.21983	58.9493
IRN	441.191	17641.6	195.944	65.4586	139.047	6204.79	6262.58	3576.84	1026.76	13379.5	10548.3	704.33	857.614	5989.08	367.683	5209.31	208.43	3192.46	44202.6	23514.9	6187.91	0.757281	30611.9	8105.65	11931.9	8606.76	21.3986	80.4265	4276.19	126196	22106.6	12152.8	1983.29	6648.41	0.374559	1782.64	92.8094	2326.16	784.537	804.61	1047.88	311.073	2996.34	0.0084767	0.631668	45082.7	89.5686	796.672	863.685
IRQ	30.4779	338.806	3145	14.9413	353.848	4998.6	25.1939	12.9124	0.979445	36.3849	3749.1	5.72406	52.6239	5.6712	49.8112	54.3064	17.8983	1340.59	18637	1178.16	3222.37	7.02879	18283.3	395.664	3807.38	1801.39	11.6352	6.14479	3416.49	18203.9	1569.41	14131.7	2414.18	5580.25	85.5042	19290.2	30.5108	762.173	97.2039	1535.37	422.65	584.219	17005.9	0.0103149	8.50005	24437.6	772.252	227.768	75.3636
ISL	73.4858	134.811	94.6167	0.105819	47.9326	26.0437	0.708214	0.5	0.285155	0.533966	1.31564	0.589711	0.360798	1.44718	0.306325	0.366459	0.115453	26.7856	412.506	7.14795	20.6734	0.548489	479.233	19.8383	18.1644	92.8803	0.0285796	0.205724	209.424	61.8179	223.406	86.8803	1.79412	32.7032	0.113795	95.2631	18.3781	18.9281	0.310817	0.976337	21.2067	1.79187	112.334	0.0899801	0.0649539	94.4281	12.7462	0.383917	0.285039
ISR	119.03	2146.84	644.803	0.620125	91.6181	355.393	20.4107	11.2937	16.3391	2.88603	67.574	5.67708	44.7333	23.7633	24.6348	2.26975	15.5822	1951.06	9187.24	217.149	1050.21	5.56544	1909.62	201.051	233.61	1866.99	0.87166	8.91893	1041.72	15908.5	1495.57	1340.18	10385.7	686.192	0.429256	1379.95	450.036	579.089	1095.48	326.12	216.508	374.864	728.014	0.387057	0.146521	7310.92	119.138	28.4275	8.73443
ITA	2411.5	5320.65	9545.69	0.483061	531.083	3403.66	273.413	155.636	83.2113	129.666	566.72	84.5725	136.38	235.301	160.024	114.677	53.1768	5376.97	12157.7	4213.5	4218.74	161.934	12151.7	884.094	597.891	6915.42	0.411786	462.102	13399.7	63487.1	5658.27	3645.02	1629.93	5873.84	0.37599	5113.67	2162.3	4533.32	328.108	58.3543	596.565	153.94	12201.8	218.923	2.27425	12625.9	3388.33	9.53244	9.2347
JAM	1.54817	119.825	108.121	0.115387	26.6091	11.2406	0.77308	10.77	0.032128	0.203199	6.76518	6.72941	0.623451	0.605419	1.60386	0.0648025	1.89907	30.725	218.863	80.1123	31.5262	0.228356	403.135	56.5112	0.44639	58.928	0.21475	0.398197	228.598	1316.92	274.286	16.1835	1868.71	148.966	0.034616	74.7331	13.6214	99.5214	81.8042	20.4358	5.1742	86.4749	67.3645	0.0840854	0.126206	47.9053	30.0305	0.988536	42.659
JOR	11.1463	238.71	25.8524	0.308232	62.5337	75.9005	41.8114	12.7928	22.8936	2.08159	294.148	2.9946	4.87953	32.2622	2.40938	9.61089	1.74583	549.887	1627.37	160.645	392.077	1.11534	1670.35	89.9321	428.278	275.955	1.33729	14.3155	579.655	3350.62	217.766	191.322	4466.88	646.277	0.255075	306.285	13.0815	52.6457	25.1152	91.9999	72.7516	191.647	471.722	41.3052	0.504943	1888.88	156.327	6.29319	4.21648
JPN	2526.22	13916.9	34410.6	5.66063	8412.9	11255	508.593	665.995	179.641	536.986	1210.69	514.341	525.85	1249.37	633.689	764.425	286.709	11756	94249.5	10750.8	5746.83	56.5534	68954.2	757.958	765.043	36669.5	2.12884	909.879	12570.1	227001	12116.5	12199.9	141736	28381.4	19.1934	3715.78	12644.5	19932.7	622.372	1163	4123.62	5215.43	32722.8	86.2266	5.51	35279.6	2264.69	11.9914	751.031
KAZ	477.013	1084.6	1208.2	52.5014	222.549	3093.53	58.1674	19.4483	326.412	15.2069	1148.32	23.4903	415.177	691.541	36.4628	16.8984	84.2913	1872.23	5277.06	1101.26	1181.05	3.4954	7410.23	2880.15	5246.84	1028.65	25.2011	7.05715	1919.42	44036.3	2089.06	11258.5	10536.1	2759.29	0.889673	2491.85	297.196	67.5136	52.8519	340.121	340.457	206.009	1044.02	73.1106	8.83188	6786.3	409.973	172.937	429.753
KEN	120.545	225.876	924.068	0.578489	142.78	53.5049	132.191	12.1685	0.109638	56.2724	215.335	34.0862	35.2921	125.854	2.23865	50.8715	3.05802	1442.53	4254.48	14.0494	1793.17	0.62182	4209.27	1.75196	0.334968	626.641	0.0976429	3.25485	3349.12	2646.08	1149.02	219.226	1186.49	663.395	0.267903	2586.86	18.7847	215.82	2330.52	68.4688	14.8794	81.5848	835.839	0.0111112	1.64394	533.174	886.39	9.50197	181.461
KGZ	6.00422	1033.82	119.817	0.10761	7.44374	2.68291	1.73479	0.598085	0.161215	0.250385	0.595691	0.629339	0.331127	22.1944	3.38064	0.142032	0.0253231	71.1337	196.73	83.7733	178.554	0.0231613	459.642	14.9697	0.0947566	9.61603	0.0941743	81.8191	392.755	371.828	128.533	799.171	843.918	18.2924	0.0717722	33.2151	1.48832	10.0017	0.907607	3.75912	11.2668	0.642116	17.3637	0.744661	0.279433	378.957	31.3034	316.348	29.9936
KHM	75.9596	140.542	276.693	2.19135	26.4303	23.97	64.3881	166.643	3.84583	45.0451	98.9503	123.75	20.3001	48.2446	40.2138	3.53071	12.0591	228.758	388.68	1982.07	19.3594	1.8117	1188.79	1201.29	22.3992	184.05	0.56068	0.443103	145.343	839.058	129.722	71.8937	2560.34	134.386	0.139183	324.02	42.833	369.923	26.8954	44.1159	171.485	93.1258	1291.2	1.66576	0.0578192	1120.39	24.5612	831.539	105.98
KOR	1909.09	4080.84	10547.3	8.52255	817.265	8694.2	156.702	205.803	214.678	265.11	568.386	105.609	94.4491	207.145	291.601	225.554	44.28	5533.09	22692.5	381.452	1044.11	205.582	85777.9	870.994	214.49	18148.4	11.7579	751.13	3368.54	151033	1963.57	28598	1596.24	10152	1.75057	5579.37	7393.51	8782.04	649.999	35.4741	2345.32	2944.51	6928.83	3308.08	34.5845	22957.3	1005.4	6.5958	384.137
KWT	18.2879	1760.85	326.913	27.9786	8.38992	167.188	97.8214	540.055	1.5594	3.59196	3405.72	12.5834	13.9686	222.189	15.7754	0.321527	5.96348	594.844	14727.2	2.37395	1004.13	0.402912	12470.8	2.83307	1048.14	238.658	0.170497	2.65161	2547.34	31375.5	8.09141	1238.84	2221.13	947.332	17.1988	2915.57	269.298	369.979	22.1414	308.453	199.372	11.1968	1643.97	8617.57	0.816939	7308.7	23.8319	96.7044	12.7391
LAO	22.7857	49.4108	1076.19	0.0870397	45.9067	61.4225	28.8884	12.6794	7.18703	1.24928	335.283	27.3772	50.4537	31.6256	11.1379	0.727029	6.89792	544.704	4806.09	2.35422	23.8556	0.429862	4819.98	4.81531	650.252	94.4632	0.377771	0.235027	16.392	55.5175	21.1898	226.936	1374.39	67.4895	0.0604678	497.836	192.68	124.798	98.0134	22.3636	391.529	11.2627	58.1216	0.260992	0.099724	1953.68	291.303	206.044	127.152
LBN	1.51829	64.8728	452.94	1.75714	31.1286	65.5821	14.5183	17.8079	10.2964	6.81521	41.4092	6.0954	3.99086	13.4882	1.55225	0.573134	4.0672	442.737	1768.71	65.904	420.757	0.849885	1674.79	25.829	1.80048	315.973	0.576892	2.30434	1135.96	6384.03	45.5391	68.0452	8808.43	310.201	1.13064	536.505	64.7263	116.223	10.0545	166.618	36.5509	2.07575	216.497	0.0943035	1.96446	872.197	95.504	3.48257	0.714743
LBR	1.80564	5.95379	43.4559	0.0494021	5.70101	6.07871	0.484948	0.275693	0.00907247	1.4794	1.32115	0.0565619	0.0149377	0.0675774	10.4775	0.10666	0.00713645	6.41947	4.32972	1.71279	7.94041	0.0399732	1.8284	0.479483	1.02717	21.04	0.0835732	0.0795321	8.65944	3.93574	46.7709	132.207	0.782253	22.9154	0.0117922	6.40883	24.1665	8.36447	2.37363	10.0363	202.138	16.6946	0.611198	0.00389915	0.154421	825.402	2.65027	0.965603	0.210413
LBY	5.23228	150.835	434.588	0.604742	22.4599	1022.26	2.83846	3.72371	0.294119	1.70593	12.6827	4.74951	8.3142	28.0809	17.2384	0.123387	2.6584	188.922	2742.24	7.32564	755.916	1.26575	2556.65	23.0628	2.88866	493.032	0.842086	0.264679	1690.28	184.669	79.5416	3344.57	119.181	2290.7	0.20251	95.4232	2922.35	39.6485	18.6144	282.239	7.46458	4.183	32.2574	3.84619	0.815129	10633.3	25.9016	55.6799	7.03935
LKA	2.98727	492.622	164.483	2.6332	29.2755	16.6032	10.629	26.8232	11.3783	4.60806	192.163	27.3916	2.62426	24.8024	58.9404	30.6369	0.36586	191.035	3514.7	220.212	592.188	2.27331	4175.93	49.4886	4.01894	854.354	0.410579	56.472	1049.27	2888.6	584.481	26.8619	2313.11	411.4	7.56017	198.342	48.3358	1003.07	488.208	177.169	17.9568	147.081	182.192	0.00534723	0.52257	2762.13	257.355	43.6155	12.4187
LTU	107.649	201.713	911.454	0.168621	29.7179	160.081	41.9695	13.4466	27.5426	33.7051	95.3755	11.5662	21.6386	10.566	164.879	63.5971	2.8211	115.172	820.429	181.358	449.348	25.7353	786.639	154.522	222.417	348.587	1.07535	7.91679	511.636	2422.52	858.111	212.01	2353.46	397.903	0.287044	467.079	97.6549	84.7176	39.2673	59.72	5.71448	31.586	413.343	1.94476	0.124121	567.729	135.836	60.2712	3.21765
LUX	81.0805	140.891	243.473	1.15788	45.5325	51.7459	0.520463	0.537005	0.384243	1.78261	2.69835	0.873246	0.745907	3.61461	1.90502	5.86968	1.92666	122.125	613.211	20.0274	84.3914	1.10049	460.068	12.5115	168.42	110.642	1.2298	46.5135	126.968	889.218	77.1874	45.1646	95.7869	61.4492	0.167065	47.9964	623.431	66.8785	9.69801	113.008	1162.52	32.9128	61.7292	2.23855	1.51536	188.238	7.45001	55.4641	5.12163
LVA	91.865	246.51	403.561	0.353884	34.7966	232.206	14.9433	3.964	1.05713	9.72701	46.4185	1.26157	4.73078	3.64362	3.06103	13.0193	0.635413	41.6101	931.456	5.8894	90.072	17.2908	846.231	9.42741	776.601	172.582	0.0493097	0.82252	413.027	2247.67	569.84	357.75	1011.06	191.703	0.499759	98.0104	47.5474	255.908	32.1319	83.3546	14.0846	31.8069	220.962	4.8006	0.0216341	477.656	29.9928	30.8958	4.57318
MAR	99.6754	589.305	117.692	0.255469	46.1014	139.904	207.656	306.663	10.1791	15.728	45.4928	2.72708	5.63009	73.3698	84.7812	80.5635	6.45716	731.24	6035.82	682.737	2022.31	29.4933	6513.37	256.807	19.4825	603.777	4.04064	58.079	806.737	11125.8	833.711	1682.02	8312.59	320.664	0.20661	1734.18	138.113	192.798	93.0474	138.204	309.579	7.80627	531.973	2.71602	0.271851	3963.7	967.613	98.3334	41.7955
MDA	8.88976	15.8131	185.572	0.13482	36.4744	208.91	39.7702	29.4391	5.18968	1.34458	3.37009	20.4987	19.4859	3.16255	8.22294	0.698745	1.04575	26.4648	851.828	69.7181	110.613	3.71222	790.941	84.965	0.336539	111.086	0.50707	0.181899	599.099	12.4442	603.309	263.164	43.8759	211.675	0.0374608	169.939	8.84561	48.1142	36.8644	23.2774	12.9319	2.12103	83.0203	0.00846466	0.882708	309.928	58.0146	20.7042	1.40464
MDG	62.9794	8.23975	47.4069	0.224078	5.74592	115.145	21.5724	2.49164	0.113638	17.0073	14.4545	1.67954	1.07895	0.451561	5.70433	4.38039	0.798222	351.384	493.973	233.606	187.212	2.44417	724.636	116.973	2.40894	190.834	0.137909	62.9831	234.014	25.7992	377.109	513.352	377.761	46.5258	0.0314307	93.2666	0.95823	33.9229	125.779	0.668946	397.842	28.1849	61.7624	0.00793578	0.255968	542.822	183.812	0.422016	100.364
MEX	588.622	7239.91	4301.23	0.59334	5011.68	1423.62	448.228	144.944	59.7504	387.773	2202.21	74.6329	131.08	573.862	236.017	1467.13	47.4134	13609.3	31665.4	4563.41	7392.59	125.435	12659.9	894.334	830.49	14563	2.6499	2213.85	21169.4	93099	82.2608	6931.29	9421.37	9424.21	0.709045	8737.32	4209.59	3248.83	2129.02	3191.51	124.279	2840	7158.72	23.2105	0.236022	18938.3	411.969	13.0794	72.1142
MKD	51.1528	5.17183	109.485	0.499667	7.51665	10.2509	14.4245	2.96045	0.0857996	4.7648	2.38201	1.13248	17.2625	27.4134	5.36471	4.86437	0.279224	70.6804	938.301	2.53625	33.7469	4.06352	875.858	5.00235	24.346	119.964	0.543951	18.2152	276.204	1649.45	199.487	73.0103	1330.04	176.324	0.0774316	757.538	0.444512	18.9069	16.2704	8.25657	6.61077	5.30307	54.6115	0.013574	0.877213	23.059	40.7694	2.12838	1.44585
MLI	6.30504	66.1971	208.767	0.0650191	50.6555	122.87	3.39154	6.89428	0.340477	24.1459	14.1438	7.20115	0.497234	1.13252	15.8838	2.53257	0.0921178	499.423	255.13	574.895	394.141	0.160097	476.051	173.686	434.867	494.922	0.0654421	0.106218	237.47	188.817	283.702	335.73	911.053	576.608	0.0264876	68.4849	6.35275	78.5902	118.001	4.14957	6.26165	22.1335	114.922	0.00967782	0.25455	739.854	56.2621	190.537	109.931
MLT	57.1837	153.128	77.2748	0.371132	14.5498	47.1919	5.98606	5.31473	0.270875	0.397147	5.7003	0.657661	0.706183	1.33535	0.316988	0.293963	0.246625	22.5024	167.877	9.91766	19.0448	0.614624	130.349	5.93432	24.7411	47.6625	0.146471	3.09235	56.732	140.408	53.1239	45.7554	3.93856	36.0936	0.238583	32.425	88.4594	16.111	17.2807	2.7168	1.7759	0.843334	87.5454	0.154449	0.0922826	123.829	0.496653	0.688132	0.138052
MMR	221.487	679.972	464.066	1.79678	152.117	957.711	9.54947	2.46109	0.517121	20.9512	664.023	3.78152	0.513785	2.06407	87.9645	62.3023	0.21906	1787.27	4837.09	502.986	129.56	6.17013	4764.35	503.976	403.576	1179.77	0.381097	192.131	334.784	1992.87	140.265	4593	1840.67	836.302	0.609021	1025.48	650.299	629.385	3510.99	129.627	7377.1	459.411	1704.07	32.3936	3.42102	16899.1	9.27579	1.54099	1.68058
MNG	57.5867	104.183	718.908	0.152081	160.415	42.8298	53.4731	5.12063	0.068292	33.2406	252.762	2.76565	2.26993	43.2064	348.573	0.597843	0.431025	247.817	1009.21	36.6729	290.848	0.196263	1115.12	57.5273	31.3929	260.515	4.9684	1.47853	256.568	3792.52	308.972	116.406	4079.74	185.071	0.576279	53.1442	33.4789	0.485274	2.75516	6.98168	33.2724	2.28769	103.04	0.00606133	0.442862	3891.2	10.9254	489.072	73.6641
MOZ	6.20197	113.304	54.2379	0.319566	7.05968	169.601	22.7856	37.9899	1.79388	116.017	342.395	26.3248	3.60667	120.949	175.118	19.2692	0.585735	64.6859	1471.26	526.534	133.91	4.63013	1729.94	372.426	35.4651	610.893	1.39022	112.779	42.7839	293.144	690.217	423.74	2551.67	1083.47	0.106102	1268.81	106.238	59.214	287.145	48.8222	313.837	115.082	244.016	0.0107575	0.718343	1757.97	8.63479	83.0803	4.29813
MRT	12.4523	35.1607	0.434042	0.238345	4.54902	14.7179	5.47168	9.0648	0.0218575	4.88757	24.3682	3.68836	0.578211	4.26249	6.91757	2.66214	0.322312	69.8341	501.939	282.926	143.015	0.51754	810.755	74.6526	32.0624	113.883	0.155426	345.447	1673.68	118.083	154.531	55.6277	126.263	137.525	0.0400047	72.7769	3.47663	17.1035	36.2091	38.783	4.48836	38.8063	84.2787	0.00753556	0.546098	332.998	46.1284	0.16303	0.35283
MWI	6.31862	6.69535	196.331	0.0996312	55.9022	33.6337	12.0363	1.15415	0.0612568	5.59274	7.8256	2.31944	1.0389	2.42288	0.73002	2.88623	3.33307	129.709	196.83	165.557	141.392	0.309895	185.613	131.033	0.344225	81.74	0.124604	0.0576222	163.864	3.62951	88.8614	86.958	279.692	213.083	0.0328797	106.203	6.31843	95.574	98.0069	71.5342	226.413	8.24168	39.07	0.00656295	0.336725	171.551	55.7752	4.27262	0.0615752
MYS	687.941	1789.54	443.614	6.17744	207.033	3106.26	22.1453	16.2589	25.3122	10.4221	40.3672	19.6146	8.79407	44.5929	62.7113	8.98722	21.8576	5402.96	11645.9	88.4122	3352.78	35.2156	12749.6	1685.91	104.65	5697	399.841	835.346	3625.8	61006.4	1358.1	6433.07	19093.4	2193.5	2.85801	2404.38	1931.29	2824.56	844.091	1428.7	4508.89	529.288	578.619	115.887	11.1942	14928.3	267.01	38.034	74.704
NAM	1.68596	41.866	336.762	0.45254	28.0095	27.9696	2.17901	0.826426	0.0451207	5.1553	2.53964	1.21678	0.227772	0.259261	1.77921	0.0660836	0.289431	62.9955	307.738	24.1399	53.4388	4.47419	339.469	97.155	1.70742	90.6861	10.0397	76.6775	116.48	28.3997	37.4391	87.5249	575.343	250.62	0.0747362	714.357	13.2693	17.664	2.82168	2.17028	16.4743	72.8904	149.974	64.4917	2.5968	546.572	13.0144	155.031	226.723
NER	3.5307	33.4449	1.95093	12.8255	6.6604	14.0332	2.74739	0.526132	0.0209907	0.619805	4.1207	0.355066	0.217905	0.182031	8.0802	6.31197	0.220369	107.723	885.979	1.09968	442.872	0.122441	966.389	2.85861	58.7052	56.4063	13.5665	20.3803	682.284	167.947	149.442	21.0361	363.777	42.5939	54.6503	89.6185	14.4366	9.05943	3.80774	1.39184	1.2761	1.59036	429.911	56.6663	14.2246	70.1549	492.369	1102.93	67.5188
NGA	388.939	2884.86	261.037	56.3788	529.05	350.574	860.273	234.94	54.2049	142.608	1775.44	58.1775	110.357	421.549	1009.69	55.4448	26.8413	1258.58	3954.3	6039.12	3084.83	153.733	5151.84	2981.7	134.155	3940.79	52.07	869.728	339.597	41430.9	2663.46	608.899	5541.54	5554.48	21.0795	7666.03	125.866	376.561	459.647	63.792	2731.28	1026.42	7373.6	0.0101307	86.2805	3728.73	409.432	1087.33	4772.31
NIC	4.75778	45.1744	71.1445	0.118227	35.3888	47.3013	6.66151	2.44721	0.0296832	0.894816	5.07453	2.52644	0.535256	3.15986	10.2817	0.774583	0.127485	24.8471	651.472	3.2934	122.257	0.22499	779.068	9.2203	30.0781	127.003	0.121508	36.9721	148.459	1256.86	185.941	66.4414	1836.51	144.702	0.0205082	13.0313	1.03126	32.4931	4.06731	38.9619	0.277452	5.8117	21.9586	0.00991056	0.461703	262.387	75.3875	32.4767	68.0425
NLD	1678.26	2283.38	3776.54	10.6287	308.749	2190.09	75.0974	20.3112	22.6036	50.6086	174.69	23.4744	26.5138	149.429	48.4667	59.9925	37.4492	2744.56	10233.1	478.554	3741.34	110.679	10280.7	210.299	478.739	6110.54	6.9483	27.7402	6161.44	14326.3	3004.33	2802.59	14097.4	2176.66	8.19217	2203.67	1341.68	764.773	47.6026	29.9092	255.622	56.8448	4389.11	7.54961	23.7023	7249.51	185.238	17.9471	52.5732
NOR	813.651	1731.4	1487.23	2.5843	281.489	1063.75	18.1601	188.558	6.95103	28.2399	140.966	19.3556	29.3224	35.5816	27.6647	40.5475	9.85698	355.218	4804.2	111.98	723.717	348.667	5168.22	115.725	1318.1	1331.72	0.825965	56.1152	1993.89	2224.69	1576.93	1122.4	1532.89	973.154	18.2507	963.349	368.849	459.88	51.3293	685.395	37.5248	66.6474	1421.7	5.13429	0.201465	2829.02	234.992	7.25128	0.0857753
NPL	9.13807	98.9679	187.76	0.66816	46.6796	141.769	104	103.362	148.019	148.274	1367.79	116.872	37.3685	138.175	16.7954	20.6508	1.63767	139.41	1541.3	2373.35	349.5	0.297172	1733.38	961.723	294.676	1069.25	1.39032	32.615	607.171	147.066	740.392	263.676	144.93	1378.04	0.0479219	2609.39	125.495	112.538	533.694	121.651	208.733	85.1316	129.159	0.0108609	3.16972	192.414	84.2395	148.312	13.5369
NZL	171.319	2369.14	1057.03	1.94486	62.1669	466.035	7.75898	4.59752	49.117	4.2085	70.2673	7.54024	9.74404	32.1153	10.3102	2.36072	7.67748	562.93	3839.1	604.15	1248.66	114.811	2978.39	166.356	289.326	1347.44	3.38885	182.805	987.137	2392.87	834.24	670.611	3250.29	895.373	0.324041	425.494	296.006	386.405	150.547	62.0414	0.7032	467.156	918.459	7.46324	1.02384	1089.52	22.7795	0.544625	9.85489
OMN	1.59171	416.772	553.885	15.228	50.4286	191.894	9.40621	53.5042	40.3071	7.78272	200.841	35.1005	21.586	13.1468	213.984	0.0339354	6.40566	596.727	12069.6	349.317	359.862	13.012	9068.83	28.3671	126.171	285.091	20.0484	0.368651	1447.98	9510.84	18.892	736.156	198.229	529.04	6.16069	453.969	46.6636	228.019	13.7058	128.063	20.9456	56.7638	270.722	2.39348	36.3759	8597.95	57.6846	21.1862	2.91063
PAK	51.135	1743.23	0.421724	7.04489	1008.39	1070.21	1853.06	24.7372	10.0739	95.6725	6480.38	16.427	375.265	1364.56	428.736	373.983	125.586	6762.33	432.464	13829.8	6606.36	9.68633	235.638	3080.73	4723.66	2006.75	0.27836	56.1062	52176.4	10737.2	10996.2	3865.74	36536.8	4752.93	0.194443	5259.29	194.919	274.526	241.229	1443.26	1696.17	1698.62	414.893	10.513	0.473125	2877.06	658.92	2713.09	313.683
PAN	6.13691	345.513	408.829	0.331907	138.044	48.7608	10.6384	7.70901	1.90225	1.79436	7.96134	9.26376	1.14751	19.3765	8.40315	6.16185	2.55379	391.744	389.061	634.456	177.117	0.0630979	1222.61	57.2967	0.758872	307.393	0.440131	0.917036	1134.96	38.9488	2.66656	131.752	56.8849	160.606	0.0751528	30.9863	153.135	60.8507	0.0493943	216.612	9.76655	18.5643	166.024	0.0112532	0.736312	128.341	0.515354	0.101117	0.281702
PER	123.668	1453.59	1439.28	4.60556	268.973	286.771	227.279	168.348	70.8579	70.1038	478.312	135.36	197.419	204.436	199.718	105.61	181.047	680.325	5742.04	1361.47	1343.73	18.4605	5140.37	732.408	778.143	1399.02	1.20012	3.87349	1660.48	7435.46	2667.76	359.503	2896.35	938.026	0.258379	1207.71	424.175	199.243	177.907	105.001	221.16	2585.74	1930.76	8.94875	0.208272	2145.64	736.836	60.3483	7.97486
PHL	545.602	3794.82	10120.2	0.371501	1107.36	2697.04	232.472	114.197	17.4414	687.078	729.498	130.158	45.3062	822.311	558.241	589.215	70.9151	4887.14	7341.79	1357.28	2809.43	156.597	9761.98	492.216	2479.27	5652.44	1.0299	183.123	1395.24	18877.3	4262.02	2559.29	23818.2	2529.81	0.20544	644.014	3342.32	3981.17	2511.27	24.9552	115.193	143.479	1751.26	0.155747	0.51136	3632.49	314.325	4.59918	262.131
PNG	44.7021	241.331	51.8153	0.141231	21.2922	205.772	1.50337	1.73168	0.478624	2.34234	15.2584	1.23468	0.185757	1.90912	20.8396	0.369487	5.61827	4.82271	214.361	1023.45	102.715	11.1075	283.741	957.433	54.5693	20.6204	0.100557	4.61333	23.9016	305.8	82.8794	490.328	6.66827	38.9748	0.0554728	56.1521	7.48506	28.4406	11.6458	0.300127	516.752	46.4896	13.0229	0.129477	0.126193	837.281	27.3893	50.3979	4.5593
POL	2287.54	604.284	8081.93	5.77547	517.063	2768.89	203.041	48.7877	85.8833	81.287	295.442	66.8356	102.442	335.098	42.924	312.14	45.515	291.205	11989.3	2982.79	2626.58	266.673	12203.2	1935.24	1108.56	3591.87	1.52674	6.83537	10362	54764.5	2933.21	5268.45	2766.17	3483.88	1.07498	4078	2970.74	718.712	48.7721	19.2055	410.285	64.7226	5356.72	36.357	12.4727	5534.81	526.521	145.624	26.1508
PRK	141.313	134.28	1203.4	34.9337	217.661	70.6631	1533.41	1410.28	1804.7	1458.91	7882.77	1131.27	587.609	1071.26	3554.19	1289.65	94.341	119.811	0.902033	1237.65	410.012	4.17846	0.501504	1223.75	3776.02	979.818	23.4955	398.049	1563.07	42.0202	409.476	95.2827	28.0539	15.4384	54.5722	19.6459	129.345	632.46	285.609	505.465	477.939	325.904	4.47361	289.563	202.432	268.763	74.2085	330.658	134.213
PRT	147.083	702.301	3435.71	5.7735	383.593	383.736	21.0102	5.60895	5.56568	26.1274	64.5917	4.50103	6.62216	19.6483	13.7453	10.428	1.86511	670.403	2293.79	470.163	406.539	7.7105	2477.58	136.13	188.536	618.055	0.464686	60.7569	1394.36	15046.5	663.709	499.901	912.285	735.687	0.641349	578.612	277.893	1092.31	131.486	12.4516	87.7655	34.6225	1043.3	10.3732	1.1688	1479.63	303.103	6.94573	3.49818
PRY	10.1327	174.315	271.286	0.419377	1367.39	158.442	58.3296	10.0268	0.0202139	193.859	319.656	0.449898	0.60074	0.636672	313.05	0.42384	0.413623	754.099	1354.56	64.778	673.315	0.23595	1484.86	2.23881	0.373432	602.965	0.277751	0.120984	743.389	6.58899	820.331	8.53726	4.27875	306.114	0.0695777	443.258	17.2994	50.4139	2.02401	901.338	185.495	0.633501	216.638	0.00830385	0.445395	1251	4.53868	0.492992	0.0142848
PSE	1.97388	37.65	141.472	0.51235	15.6584	31.2425	14.0958	43.4059	0.179639	2.33966	62.5885	1.59782	3.24877	2.65558	3.52462	0.159974	0.175558	123.754	910.78	82.1907	67.4806	0.530868	786.77	42.2912	55.7457	187.299	0.697603	9.26963	227.021	9.55271	24.6006	53.8109	18.1137	117.786	0.382344	247.416	20.8374	77.7615	7.21119	13.3199	42.5937	52.7168	158.316	4.79431	1.13074	344.491	62.8474	2.72263	7.17332
QAT	1.03709	31.5024	1762.4	0.589002	487.866	323.449	17.7612	531.233	185.249	1.17155	10903.8	51.0142	81.7468	913.173	3.99177	0.143842	15.7716	1052.24	16342.7	243.192	981.675	0.0691947	17088.5	106.726	303.856	1950.22	0.216882	5.3651	1782.87	42.3256	6.51878	835.406	13.4468	3180.65	0.0848557	2054.86	89.9065	562.589	11.9245	203.933	169.72	451.648	1497	0.0443019	0.056696	6393.51	8.59786	0.599017	5.03117
ROU	519.793	436.938	2931.98	1.42353	346.401	1033.18	29.7826	25.948	28.6287	59.4647	38.0511	17.4616	13.6072	37.6872	15.6121	73.8776	8.71327	438.556	10024.2	422.182	1154.99	82.493	10320.1	425.067	69.0645	1035.69	0.487601	0.496459	3411.41	10669	929.398	885.77	6329.63	900.926	0.221666	878.84	164.676	293.069	30.474	178.523	490.053	65.9342	1308.11	3.28248	0.28558	1605.17	392.306	97.1244	15.6258
RUS	587.946	15068.5	14827.4	4.8487	3093.91	10617.3	266.855	4186.62	993.76	324.245	8569.84	1558.12	274.157	1496.93	477.012	1695.99	114.15	9673.35	65884.9	1764.71	11653.9	14.5211	70739.3	499.023	20822.5	16680.3	2.66714	61.8872	24627.2	231553	12223.8	44634.3	125818	10324.6	4.67786	17771.6	5940.9	2358.51	1631.04	1417.22	12548.6	487.508	18200.7	53.3425	2.99242	150803	2207.96	669.875	8.26274
RWA	6.76705	81.2135	67.54	0.253024	3.43072	92.6786	11.1214	3.69519	0.779824	1.6038	17.2542	1.67331	0.975037	0.867871	56.5866	3.24834	7.35276	13.2432	545.334	104.863	158.264	0.0797388	1703.28	181.31	0.371409	53.6043	0.391836	0.835899	46.3341	5.8105	1898.94	255.893	59.3113	94.9392	0.0612641	66.6238	34.8934	43.535	31.7138	3.77569	27.3623	165.786	28.9421	0.00453817	0.816798	663.731	15.7968	20.9651	0.415734
SAU	13199.7	16608.8	2279.3	2.51685	282.15	1118.23	7.49178	38.5618	8.82143	1360.92	336.582	16.4083	28.1427	27.8969	11.5332	934.861	10.5344	4394.22	29120.8	15206.7	7635.8	3.53825	41434.3	6680.36	505.596	5873.19	0.276878	397.717	15459.3	127245	7153.85	7129.25	98317.6	14983.9	0.357458	18177.2	1110.85	1125	67.2988	3414.05	483.025	603.765	3687.65	0.516321	0.443717	7250.52	851.456	292.379	12.4283
SDN	1.48309	282.063	1780.86	0.830072	132.704	136.792	191.663	147.179	0.034435	4.63301	353.323	4.78726	69.9377	230.269	2.06912	0.353873	22.2771	2095.85	4193.15	437.299	515.85	0.496385	4456.35	134.714	420.504	41.6045	0.846649	10.1008	10498.1	256.373	434.136	170.031	416.584	121.535	0.0450703	587.123	882.834	259.104	3.2836	112.456	2245.88	12.188	132.17	0.39051	0.606346	5623.01	678.036	1954.2	568.787
SDS	7.01945	25.8411	4.37631	0.341338	8.07774	21.1934	0.00117538	0.00149708	0.229735	0.0411725	0.0245214	0.0209648	0.00190826	0.193156	0.033967	0.0131798	0.00577003	1.60386	4.75948	1.42166	1.22764	0.409601	3.89544	5.2695	1.43714	1.09293	0.375471	0.246977	2.64693	3.1246	0.426406	4.04921	201.101	2.70979	0.305393	0.361038	3.16611	2.61499	0.227903	0.161603	0.502772	1.37772	1.80075	9.46403	0.520834	7.87269	0.687131	0.683436	0.7084
SEN	10.6468	162.332	44.3299	0.505257	174.843	48.448	29.0225	8.42298	0.0627088	63.5657	80.9574	3.07876	1.17539	27.607	19.2982	2.6109	0.903207	570.913	1454.39	647.717	823.19	9.62136	1574.56	420.829	490.143	220.061	0.696183	147.293	522.25	1918.58	426.571	61.3011	1266.29	210.335	1.89229	13.3667	6.5554	233.013	606.525	70.8026	88.9031	5.714	63.7094	0.00764788	0.515961	425.837	20.7751	123.174	43.7682
SGP	309.538	5586.57	1210.2	1.34009	125.841	1052.44	61.6017	105.996	144.776	43.7182	199.906	152.813	102.897	219.415	28.4871	27.7216	11.5939	631.978	15188.9	221.137	611.481	16.0527	3546.72	154.472	215.086	3195.49	3.23546	36.0564	695.223	3061.32	660.264	1391.92	2707.88	1059.34	4.08016	417.542	3042.48	153.566	84.7512	148.73	492.759	438.81	3658.12	4.36466	3.14245	10074.4	287.409	2.08014	7.19179
SLE	1.74862	26.4672	12.3765	0.154185	1.31121	16.5222	2.64933	4.80451	0.0221	5.25664	18.8975	1.50537	0.20248	0.120948	3.40817	0.68538	0.549559	14.8417	12.0409	328.532	236.706	0.324837	12.5334	65.6456	5.93543	37.5875	0.113304	1.46184	10.2609	31.243	117.47	50.0365	138.484	45.9083	0.0243357	90.1117	6.24619	11.0674	108.589	17.7428	3.70361	21.3758	8.81254	0.0669433	0.113611	61.9548	184.372	0.0664357	1.82076
SLV	7.14712	7.12283	199.876	0.0591631	61.1194	17.7062	4.02423	1.8839	0.869519	1.82572	4.9345	1.93011	1.42154	5.39808	4.00564	0.162372	0.40613	114.516	180.878	411.124	250.553	2.52809	416.79	391.061	1.01132	24.207	0.0525614	12.8498	278.029	687.843	688.195	53.7403	4694.06	408.374	0.0231432	2.22184	0.657566	82.0364	38.4813	39.0244	121.272	191.154	5.65652	0.00709793	0.20201	86.7778	1334.75	0.680147	48.1999
SOM	1.52455	10.7357	453.441	0.0496328	59.4377	164.524	7.14734	3.07123	3.68956	11.1071	268.002	13.9313	0.390982	5.1849	42.4141	0.00956632	4.51437	255.583	154.081	9.30961	128.121	0.0219601	246.876	8.08129	0.859049	159.921	0.0827759	11.582	642.776	10.1688	67.202	490.81	4.05827	378.199	0.120551	71.4371	697.563	26.6217	16.3421	51.5319	946.428	375.374	9.82936	0.0162533	0.155155	680.14	0.293808	35.7119	3.27558
SRB	517.511	523.449	198.008	0.133769	7.35284	145.569	1.50207	1.66534	0.212497	1.5287	4.11046	4.55	2.0893	18.6984	4.99237	2.30887	2.84977	44.3567	1021.03	3.12442	47.7968	0.139666	1368.49	1.37978	82.7597	73.6775	0.35502	1.34992	97.3866	189.88	155.112	356.007	310.232	217.237	0.0636808	34.3343	144.856	13.6819	67.688	0.366866	0.608303	108.38	84.1256	0.00294474	0.321221	965.105	106.578	27.9151	1.56271
SVK	231.38	244.125	1144.46	1.58955	263.212	301.431	18.1478	10.4983	8.98472	7.07899	80.4285	11.9362	10.9503	21.4226	19.2058	8.95073	2.89986	271.368	1280.44	322.988	326.391	6.04004	1362.53	451.731	98.1332	878.309	1.38758	1.22251	740.131	8100.61	1536.55	551.704	417.776	557.417	0.815884	564.641	225.23	224.704	5.96755	81.0144	58.3879	15.5779	874.407	4.91596	0.727543	1169.21	26.6976	38.9295	2.70292
SVN	85.5409	82.1434	305.03	0.214219	36.8224	149.577	7.52125	10.0102	6.32948	8.61564	21.2752	7.81926	3.51298	22.0584	24.214	3.39884	1.95489	96.588	675.201	98.3542	185.902	1.28102	692.792	117.871	206.951	248.284	0.153328	1.90732	381.903	2246.54	320.392	273.492	879.197	448.027	1.50688	276.767	107.136	77.7996	9.64037	150.984	109.757	91.7203	304.688	0.161427	0.136982	384.172	90.9424	6.23529	2.29909
SWE	545.442	1336.37	3423.18	0.883084	197.306	1290.9	99.6625	39.4653	26.7235	34.9157	395.812	60.5578	51.0465	84.9125	31.0373	10.3658	34.9827	505.357	5387.02	1021.03	940.103	6.17936	5350.9	1294.94	219.85	1451.24	4.65695	4.87563	2653.27	11348	1049.32	1954.04	9950.65	1961.94	5.11267	2777.55	525.822	327.757	95.6152	23.2711	582.254	80.9212	3009.99	63.8788	0.691475	2561.39	360.615	68.1065	2.957
SYR	1.10317	166.437	24.8461	0.256028	83.76	515.636	8.5821	3.79307	0.148093	7.0359	13.2688	1.54814	1.08408	8.80284	21.7869	0.823336	0.316638	151.828	2434.64	3.68542	275.529	5.27315	2329.85	6.98117	1367.36	100.23	0.320267	0.287886	1341.55	42.5158	9.44796	580.925	35.9713	7068.94	0.622019	25.6005	24.8368	11.8439	22.9374	35.7144	13.9948	6.11854	144.187	0.00813869	0.382567	3275.23	181.417	0.492245	0.058433
TCD	6.79996	80.1147	31.0698	0.0833694	74.461	69.5416	18.912	2.31756	0.046069	2.67626	6.80787	16.0497	0.367097	4.76291	5.37591	0.682578	2.81566	635.862	329.1	270.708	1156.51	2.71416	290.862	77.9227	31.773	149.65	0.110386	8.76627	481.623	13.5399	629.164	148.239	7.59664	373.333	0.0718986	164.915	0.810232	65.3068	1977.52	36.5584	13.3029	40.7288	114.741	0.00740849	0.309823	335.854	22.3946	0.099811	18.0861
TGO	3.50904	4.84209	15.8823	0.113812	4.48681	20.8181	0.925759	1.67069	0.0150642	1.15228	1.93205	0.808169	0.0486681	0.176798	1.29493	2.1587	0.355795	17.4435	110.983	462.396	65.1191	0.040611	43.5882	78.4823	0.367986	41.1975	0.125124	0.00730479	34.1654	12.4161	183.503	102.914	158.017	65.2439	0.0386357	4.45445	6.39096	30.4932	118.695	1.446	10.2735	30.3145	3.84104	0.00712303	0.533732	162.029	75.2918	0.602037	5.02498
THA	987.209	3526.43	13653.8	125.231	88.047	972.988	45.6289	36.3105	25.711	178.6	283.272	59.0764	26.2622	56.1423	110.445	11.2688	20.4826	1421.15	28048.9	2962.16	678.351	36.0106	23227.8	1638.56	7532.1	15473	2.09267	220.78	2860.05	45330.9	2917.55	8073.26	14477.8	5820.53	0.107616	5972.15	3506.26	1903.32	1461.63	342.892	1344.14	3418.36	8842.11	23.4456	52.3479	12255	147.569	13.393	483.286
TJK	2.54029	88.4684	41.4041	6.55667	21.777	79.6595	1.01069	70.5147	160.54	6.53762	139.817	4.49009	6.1109	169.408	2.16733	4.57721	27.3511	174.873	134.344	567.5	226.704	0.216714	715.35	594.083	61.5352	91.2903	2.8164	895.064	273.808	805.472	268.377	161.247	741.37	237.29	0.68303	139.034	11.7198	0.471497	0.894176	21.9315	220.295	35.611	39.0337	0.00831438	2.34007	1440.31	7.88516	64.6361	0.0210469
TKM	1.05837	181.888	320.401	0.0441502	220.287	53.925	50.1774	4.28148	13.3831	1.19178	21.0371	2.45977	0.591794	27.9281	10.9078	0.392653	2.72195	1684.21	1416.78	3.84294	271.383	0.110152	1834.54	9.95993	0.501247	60.7003	0.0394074	0.0165463	2717.85	7.74623	0.612841	210.552	0.257901	149.061	0.0183739	107.163	17.158	51.015	0.167798	26.9498	3.6407	0.113234	8.88516	0.0167453	0.0446569	6275.46	1.82121	0.334129	0.070346
TUN	254.496	269.018	228.186	3.23633	16.0971	55.9803	15.2281	15.4612	2.45663	0.928677	49.5961	6.58663	33.4145	65.0817	1.25263	1.2594	6.65988	113.15	2103.36	547.319	462.804	70.0721	1961.27	587.091	858.623	469.813	5.59699	100.765	756.85	1432.84	297.708	48.4769	1885.7	140.039	0.268323	646.533	86.1481	39.0824	184.284	3.21172	28.9612	0.533378	168.242	10.1932	1.15955	836.458	86.7513	12.403	0.386289
TUR	1601.6	1395.43	2129.68	0.961735	404.567	2030.24	65.4168	79.6301	73.7064	137.434	100.469	65.7899	39.3744	344.531	50.0934	454.977	73.5793	2743.45	35182.9	1031.06	5963.29	303.072	41021.3	380.031	444.175	3407.68	2.43843	91.7166	21938.9	66634	3038.83	4360.86	21375.9	6536.2	19.5372	6473.25	1661.44	388.45	469.644	286.392	591.443	29.5056	10296.7	49.2951	0.936245	17269.1	862.064	114.544	48.6813
TZA	104.311	68.659	1250.12	10.4403	59.7666	32.6419	51.3906	122.888	21.2215	29.4253	483.104	10.2749	2.09693	12.8769	1.84141	2.8202	1.33264	522.2	2605.05	1417.96	976.056	39.0508	2168.74	109.078	17.5412	545.976	17.3654	9.50677	548.423	58.2764	707.512	113.698	413.024	1076.49	1.79615	740.498	22.9964	70.7432	43.3015	0.509063	455.703	88.8216	1299.32	15.488	28.0373	2208.74	735.317	736.383	361.354
UGA	5.61993	7.56495	655.078	0.0415686	34.5787	79.891	7.48784	5.81473	0.118326	3.48176	6.94271	1.77117	6.87999	6.44399	1.84999	9.49528	2.65225	319.435	628.25	414.764	192.331	13.0021	1387.34	807.46	189.836	427.347	0.0458855	1.53073	591.782	1.18555	1228.52	317.669	1013.81	894.138	0.0282503	300.287	5.68108	86.9268	34.3018	78.4067	160.691	0.584453	119.045	0.00759409	0.178027	745.894	362.577	332.231	11.3682
UKR	495.359	406.473	5745.62	7.56767	891.03	578.703	78.7427	31.0954	3.74741	10.2176	99.8913	4.86185	227.48	12.874	47.2874	53.3424	2.91879	2038.09	10139.6	42.4632	2177.72	2.01557	6333.35	52.2711	58.0129	756.077	9.63551	3.76831	7488.19	37087.7	1513.12	2884.53	9390.46	1115.8	0.532408	1391.99	24.8121	928.099	606.302	120.968	13.9534	2.16948	461.943	65.4108	14.7853	589.315	1553.81	7281.02	1.57932
URY	10.274	115.318	738.513	19.0557	99.8749	61.7368	16.875	11.6137	0.0712621	10.7341	47.3204	1.34166	0.94331	86.4277	1.39184	0.709693	0.78874	1372.02	2617.83	3.97869	263.266	17.6374	405.517	5.07566	0.482413	465.009	21.7139	0.418872	908.354	190.918	31.4682	297.614	103.37	167.643	5.37093	368.064	82.9097	43.0888	1.40212	83.8413	57.2394	3.88098	137.02	0.214228	47.4518	644.399	44.0138	1.37956	15.6964
USA	22203	137346	77980	1375.13	8936.6	36292	2784.69	3220.79	1672.53	1342.04	3214.22	2700.75	1855.44	4191.81	2548.23	1017.6	1160	49229.1	300147	8833.13	17671.2	169.427	198752	9727.74	2656.99	117378	0.716653	487.646	144300	124100	86318.2	198807	530551	66104.4	5.54465	56115.7	76411.9	12941.2	1740.91	3049.52	1283.08	28370.5	147809	16.4536	578.059	442672	3611.73	52.878	407.639
UZB	539.535	354.022	1169.68	0.290654	111.982	588.709	280.081	4.43585	0.304524	36.2864	713.805	3.70083	23.0322	516.375	42.1992	0.490598	2.34278	1164.6	10995.6	1255.56	389.275	0.520351	9909.02	32.0351	753.667	538.64	0.477658	357.127	6300.28	204.914	151.456	3044.98	120.089	3775.99	0.125049	4062.36	229.962	12.2799	47.4387	17.2052	142.213	32.771	278.164	0.0106196	0.417288	2600.51	50.2704	48.9387	0.018695
VEN	71.2633	557.262	1162.98	18.0822	307.559	244.611	9.88188	38.4151	11.005	618.113	109.563	3.39527	17.2758	378.468	1014.35	0.163218	4.52735	11258.5	21225.1	5.51674	729.925	117.814	15689.4	6.80057	160.386	793.788	95.9853	52.9479	3557.35	176.191	398.601	1694.37	124.823	770.123	20.0287	377.499	614.184	179.165	15.1797	862.455	51.4081	351.01	317.232	177.627	66.9313	1911.02	746.854	42.5982	109.402
VNM	491.432	2205.66	1811.29	152.185	129.182	1523.62	168.284	18.9998	68.8811	242.542	589.999	47.9188	155.498	81.9644	515.496	20.0163	23.9241	3998.7	17948.8	134.618	294.391	157.518	49155.5	14.373	50.0065	917.816	310.332	1616.47	1280.05	87600.5	2899.06	3106.08	22382.3	3959.19	18.8356	1308.62	548.239	4961.2	5900.72	365.181	5356.74	110.355	4865.04	232.691	258.878	7305.8	2092.67	11.7131	6.83579
XAF	37.3311	525.351	108.731	0.0309113	0.865733	58.191	14.7997	1.18129	4.08445	34.4409	11.873	3.63808	1.17146	5.74653	19.1719	1.52996	1.67791	51.3045	1163.03	1687.43	95.7788	0.519536	1129.97	17.5217	4.18597	216.314	0.0301168	2.02033	335.537	1032.48	930.057	166.726	2888.65	367.14	0.102953	273.185	75.4928	48.0721	106.21	33.5479	503.551	104.495	276.869	0.00697301	0.164806	538.537	62.8966	52.4528	9.99233
XAM	14.9497	322.162	516.841	0.721492	171.486	128.194	112.726	148.871	14.4985	90.5459	753.88	47.1472	13.437	12.8579	10.1039	0.504859	5.51274	291.383	4495.45	50.1556	428.774	2.6613	3827.81	98.6913	16.0954	452.912	0.128688	9.87031	815.574	5627.91	27.6862	452.322	2965.96	489.498	2.03363	145.056	539.914	203.482	5.97107	59.575	2011.28	161.887	481.546	0.021059	0.322414	1019	10.4124	1.11799	31.604
XAS	111.519	4605.85	9.3052	0.193397	0.587664	1616.6	41.805	585.24	86.5169	8.62309	4.38493	5.85877	29.7977	397.36	3.90098	43.4388	15.8239	2.52469	9613.09	4.10191	5.69598	0.71742	8903.88	9.62006	14.4643	26666	28.1825	187.741	127.62	43711	5517.82	18277.4	41616.7	5020	0.147282	1177.16	1161.41	177.413	364.376	6.70086	637.155	1591.74	1303.03	0.00658794	28.5973	21263.2	1143.73	219.37	139.148
XEU	5.70967	402.459	66.8315	4.22588	5.91962	67.7523	3.09632	3.12009	1.54024	34.6636	8.10472	1.79951	1.00037	10.0984	0.9497	0.189168	0.309138	17.7999	448.194	0.421313	17.099	0.445843	724.001	0.672351	15.1337	265.23	3.73603	180.028	118.679	28.1338	4.10139	262.514	11.6905	82.8312	0.169394	1.90672	218.655	14.5718	2.61218	5.70327	4.60644	38.643	4.07473	2.30037	2.38835	528.388	0.859315	0.899924	9.86365
YEM	14.2868	21.9404	26.2782	0.338926	148.925	21.3696	65.1473	35.9057	1.91411	4.19062	27.0503	44.8383	9.56164	62.6336	1.72048	1.04985	5.16177	89.0673	986.449	204.716	1152.35	9.93941	1044.06	172.988	1.83637	87.2334	0.193318	12.306	638.507	2287.71	547.068	80.618	1460.84	439.418	0.218912	291.546	32.3913	13.0743	131.979	17.5426	52.1763	2.24277	145.739	0.00998816	0.347242	817.718	194.978	47.7601	8.91393
ZAF	2153.57	3322.86	5748.97	0.249043	249.665	520.533	27.6062	26.1374	36.7473	66.0205	133.888	31.1724	26.7938	346.333	116.533	73.9833	112.193	9837.3	14850.3	109.435	4065.28	198.373	13571.1	333.291	3586.89	2020.51	0.289891	6.91608	4070.54	37114.4	11489	3221.01	75844.4	3918.15	0.195873	2079.91	1554.84	118.441	342.888	458.141	170.468	19.687	3743.95	11.4643	0.942531	14022.6	317.518	577.583	27.0412
ZMB	2.97342	40.0127	483.419	0.182877	59.7407	74.5373	11.2989	2.48785	0.050733	6.62718	28.005	1.27774	0.75198	3.30248	8.56486	51.9998	1.64751	206.646	709.262	6.05761	99.092	1.26047	2052.91	10.9676	1697.93	122.303	0.216305	2.58837	204.279	44.4984	692.535	353.701	935.191	978.844	0.0660301	407.466	30.021	87.0015	349.624	9.54493	1.00146	2.79189	13.8745	0.029061	0.38745	644.509	123.364	152.517	2.3497
ZWE	2.36661	20.6518	784.033	5.29787	40.1637	54.7112	4.18132	6.89453	0.549763	30.8906	32.2845	2.49442	0.471918	1.62307	72.845	0.256032	2.53896	383.335	240.287	90.2884	183.218	0.839094	273.779	104.218	31.573	113.192	0.527744	106.04	278.207	1050.88	266.983	97.0029	4779.16	456.331	9.84446	571.525	37.1485	76.3493	10.4984	53.3608	44.3995	4.00427	30.7271	0.0892256	0.574819	349.449	21.544	2.37486	1.21409
[truncated: 85 more columns]

## Sheet: Spendings
Expenses (*1000 USD) 2019	Administrative services product	Air transport product	Alcoholic and other beverages product	Aluminium ore product	Animal oils and fats product	Arts, entertainment and recreation product	Basic aluminium product	Basic Copper product	Basic Gold product	Basic inorganic chemicals product	Basic iron and steel product	Basic lead/zinc/silver product	Basic nickel product	Basic non-ferrous metals n.e.c. product	Basic organic chemicals product	Basic petrochemical products product	Basic tin product	Beef meat product	Building construction product	Cement, lime and plaster products product	Cereal products product	Chemical and fertilizer minerals product	Civil engineering construction product	Clay building materials product	Coke oven products product	Computers; electronic products; optical and precision instruments product	Copper ores product	Crustaceans and molluscs product	Dairy products product	Distribution of gaseous fuels through mains product	Dyes, paints, glues, detergents and other chemical products product	Education product	Electric power generation, transmission and distribution product	Electrical equipment product	Extraction of salt product	Fabricated metal products product	Finance and insurance product	Fish products product	Fishing product	Food products and feeds n.e.c. product	Forestry and logging product	Fruit products product	Furniture and other manufacturing n.e.c product	Gas extraction product	Gold ores product	Government; social security; defence; public order product	Growing beverage crops (coffee, tea etc) product	Growing cereals n.e.c product	Growing crops n.e.c. product
AFG	181217	47150	531.19	20.6566	45930.4	211155	4254.71	3969.24	38.1745	230.316	4443.34	973.812	2545.95	6477.06	319.897	165.478	1454.25	188749	657017	38161.9	626820	28906.1	863746	11056.4	6565.1	122619	40.8982	4682.8	881701	228693	314629	1.09763e+06	114174	91712.9	34.862	40285.6	9740.71	554.079	68764	14966.5	989098	3980.94	7738.17	18.4601	169.277	2.21187e+06	94226.7	2.00611e+06	9830.55
AGO	7489.37	52215.4	1.67986e+06	366.986	17969.8	343463	7877.73	7586.84	127.589	618.968	59833.5	2261.56	414.611	2204.29	228.981	7.19074	169.115	151597	5.02618e+06	4237.79	191689	441.13	6.89175e+06	1137.87	42.4655	464587	175.942	20968.5	146492	41146.2	31788.8	1.71414e+06	3829.3	164926	556.81	465653	2.58549e+06	121713	54835.2	57448.8	1.9189e+06	6731.35	232820	7.65288	123.7	7.23273e+06	254134	333.308	5.4947
ALB	63780.2	55801	227530	9.77975	10727.2	110263	5726.43	1474.37	70.4552	386.524	7173.63	3617.95	391.302	1615.76	1200.64	1269.48	325.246	61278.4	1.32832e+06	20556.8	82588.4	518.671	1.5725e+06	37493.2	437.533	160940	14.6326	4715.08	328256	81535.4	443227	513233	222395	200209	25.1164	12743.4	92129.2	9000.17	157169	2114.07	34155.6	3730.44	41878.1	26.5238	17.6853	777271	62333.2	210.3	51.2477
ARE	203286	5.81013e+06	73821.2	83.4357	116070	1.64765e+06	13929.2	120984	769914	103747	40720.9	35084.6	6856.56	137397	17804	5393.02	1796.02	708768	1.94192e+07	2914.79	1.61788e+06	51.1188	2.55202e+07	1841.66	4.45238e+06	1.97991e+06	945.782	790.143	8.19226e+06	4439.19	37859.9	9.82129e+06	249779	709788	479.941	3.85319e+06	1.18788e+07	1.15856e+06	79329.7	332766	16451	31728.5	7.14878e+06	5.38644e+06	252.786	3.70439e+07	6470	579.383	687.629
ARG	1.81333e+06	1.17968e+06	6.52265e+06	174.189	484485	3.77987e+06	42093.2	46526.9	34642.8	15023.4	282124	26211.7	27474.6	43574.4	20129.7	22165.8	30910.2	1.17068e+07	1.02015e+07	20034.3	1.85855e+06	13241.2	1.47085e+07	12843.3	46799.9	4.97586e+06	51.728	267982	6.41073e+06	217917	4.12977e+06	2.69347e+07	6.94523e+06	1.78857e+06	70.1935	1.74518e+06	1.57283e+07	187397	407739	1.49973e+06	1.06629e+06	11227.8	1.67201e+06	4630.29	128.838	3.56094e+07	15131.7	1000.44	373272
ARM	75326.1	67745.4	36917.9	33.8629	26261.3	69305.3	1768.64	2172.02	1486.08	28275.4	3215.65	1725.38	1278.38	1238.71	558.59	420.199	1207.51	245028	554874	22867.7	124532	203.943	1.0929e+06	7670.11	72.6634	99763	410.986	311.429	283477	807.699	99366.2	1.04409e+06	162821	88997.6	182.353	15078.9	177192	16203	38715.5	2380.73	36455.9	9831.11	109068	136.908	177.809	711536	590.326	129829	1966.84
AUS	8.37206e+06	1.03081e+07	1.01124e+07	96593.7	496695	2.52908e+07	832836	1518.61	820653	22029.2	480905	20585.9	1383.5	38574.4	124251	55564.3	3236.31	2.79781e+06	1.05919e+08	162711	2.96335e+06	53137.7	6.99593e+07	246147	81649.3	1.63216e+07	1.90287e+06	1.38794e+06	1.08805e+07	1.52889e+06	4.566e+06	7.28743e+07	1.21671e+07	5.16532e+06	135563	4.66361e+06	6.97466e+07	3.76286e+06	1.07979e+06	865227	1.02939e+06	2.57692e+06	6.34461e+06	4.62213e+06	15127.1	1.01152e+08	18899.8	1351.37	5315.93
AUT	6.44885e+06	1.53036e+06	5.12694e+06	2588.8	421322	5.91874e+06	169280	53070.1	24682	51045.4	649991	29541	23692.1	136249	55158.2	84153.7	11991.8	546157	1.54287e+07	148630	629567	15299.4	2.03494e+07	357872	234178	6.62706e+06	1092.38	39543.5	2.63127e+06	1.98965e+06	2.21187e+06	2.34276e+07	2.29887e+06	5.36035e+06	48588.4	3.3222e+06	1.0184e+07	664019	54781.6	137635	46886.6	50268	9.07174e+06	7856.22	940.93	2.52944e+07	40253.4	25815	13203.8
AZE	254959	735160	972941	479.526	17703.9	352028	14198.6	234062	810.568	362195	11547.5	1472.98	1143.67	15000.6	1.39928e+06	44895.1	306.853	482709	2.17217e+06	1137.35	483090	186.027	2.38925e+06	27566.2	683.426	275440	7520.15	141146	772790	370448	222211	1.91015e+06	62361.9	158191	4736.73	88163.1	169524	20488.9	139544	41151.6	879.923	33197.4	136028	24.0411	1231.08	3.39176e+06	21258.5	367725	4145.92
BDI	33253.4	19917.2	141875	33.8001	2781.94	27143.8	2029.57	353.399	4.56156	403.299	4259.85	348.85	17.7095	47.4228	944.265	708.784	67.3405	14560.9	54563.7	20485.7	24222	75.8795	139560	8568.3	25.6069	23253.9	47.8976	1293.54	44935.4	11418.6	2120.19	110129	12118	23519.2	41.2882	1804.5	44872.4	17190.8	40408.6	798.628	113414	5242.44	19869	5.44246	181.169	477425	3.17338	87519.7	1286.78
BEL	9.41404e+06	1.73691e+06	5.97756e+06	7716.97	259889	5.5342e+06	95245.5	24539.1	36569.3	74222	192381	39492.3	44121.2	36622.6	60602.2	68627.9	52907.4	853547	2.14715e+07	161238	879285	17855.1	2.72077e+07	69279.3	944504	7.98131e+06	34135.7	95087.6	8.30198e+06	4.15476e+06	1.55531e+06	3.27271e+07	4.09482e+06	4.00165e+06	13746.3	5.03981e+06	2.08217e+07	1.4394e+06	166462	285417	52763.1	41711.2	6.14635e+06	1.48786e+06	294899	4.24129e+07	104683	12728.2	8993.96
BEN	253188	8583.83	125649	42.0003	3742.06	57249.6	4811.49	1463.49	65.1235	1715.75	1403.57	829.807	663.374	3434.57	5780.39	18704.3	318.71	17439.4	969160	33531.8	15591.5	8009.75	1.35963e+06	17499.1	81.3431	51250.8	223.442	16593.1	21582.4	24513	99905.1	496990	28830.1	202108	110.068	22063.8	20165.3	68133.8	219889	1161.3	16264.2	6125	65602.2	10.4466	162.92	1.19724e+06	21.6771	132.963	2.00731e+06
BFA	96306.4	60093.6	757589	76.6772	8347.54	76686.8	4313.22	2412.91	114.568	11880.3	5972.76	481.017	509.082	2424.77	2886.08	1565.59	92.9906	66841.7	788931	5429.29	99869	20.784	1.02825e+06	1971.65	4519.73	215053	403.078	3279.95	75774.5	98215.9	126033	427792	286337	170199	276.369	179376	75613.8	38181.3	40281.2	3978.08	186.301	35020.7	178579	11.3868	156.567	2.373e+06	13564.7	1.01864e+06	14452.8
BGD	122105	48162.9	1091.7	40.5012	29769.2	865635	95637.3	80937.2	20703.3	1623.39	702800	83227.7	5750.35	48026.9	2056.68	121433	7569.42	317771	5.82173e+07	2.16018e+06	326731	7232.9	2.32294e+07	35388	7053.14	7.65887e+06	42.3393	3.60492e+06	1.29737e+06	745539	1.24486e+06	2.86891e+07	1.28329e+06	6.49673e+06	1078.18	571244	2.10808e+06	2.82004e+06	8.37503e+06	131402	604793	34146.5	1.82823e+06	3797.27	170.484	1.83117e+07	102751	1.5232e+07	41749.3
BGR	1.13531e+06	454338	1.23516e+06	1027.21	85162.3	909161	16779.3	3611.7	8102.79	4830.05	17795.2	5577.18	6818.16	14021.5	3787.92	75730.4	6089.82	77132.5	2.52441e+06	21488	302045	6310.06	2.82532e+06	25680.4	6858.43	882371	3040.13	1306.71	964704	109373	313334	2.43776e+06	878192	805527	99.8079	719046	1.02218e+06	108994	18090.7	171190	6232.22	17479.1	772731	137.412	42.407	4.41205e+06	48309.9	151139	8614.69
BHR	11044.1	284895	11144.4	22.7844	15619.3	115690	7317.86	17981.9	160277	1123.17	11932	5573.03	3807.32	340027	1111.71	7047.58	5996.59	241960	2.47206e+06	16013.3	851377	31.9373	3.16425e+06	4974.83	536489	833147	240.578	755.357	670289	2660.7	8853.78	2.16599e+06	775.803	951229	91.0868	88391.6	2.74965e+06	42576.4	1016.69	73523.5	7555.19	111733	366845	13.698	131.206	2.87855e+06	1386.65	1121.25	4718.19
BHS	5816.61	7950.15	290670	43.1457	3343.53	99993.8	840.158	334.393	119.581	135.96	1797.55	239.306	68.0946	179.669	1321.98	30.7733	18.0729	27378.6	605501	827.211	23595.6	18.434	1.01246e+06	450.795	44.8784	60475.5	402.027	145.024	76470.5	386.16	1315.08	634279	2820.25	30754.6	146.098	906.503	1.50375e+06	23007.3	50.8841	26644.3	682.059	3427.14	16777.1	8.8172	181.647	1.11478e+06	17.1994	98.6611	514.914
BIH	5368.93	31635.4	595915	22.3395	2004.62	244555	1368.12	2030.25	29.2829	3516.55	7435.12	913.864	1024.65	1377.43	882.462	2375.55	226.122	73597.5	1.15963e+06	11075.4	121108	533.465	1.34876e+06	6985.8	1206.93	301692	54.6967	2212.38	270748	5888.4	220848	890397	201792	316080	684.447	128189	515190	21103.3	72186.1	124595	30200.4	1195.72	258169	794.118	148.819	1.73033e+06	137274	228.9	10.3459
BLR	900708	597851	2.77082e+06	60.2196	28488.7	559648	4204.1	14580.1	26584.2	47.2718	8477.35	13029.8	11740.5	131976	61.4473	554.721	4069.66	536048	2.93493e+06	1321.26	515739	3091.86	3.57477e+06	721.114	837151	246878	70.3853	200.994	1.1442e+06	66034.4	50594.6	3.868e+06	29467.5	733082	196.466	257536	959391	97123	215479	5827.61	5845.63	37.0056	148123	1366	112.789	2.80646e+06	176777	271830	46153.9
BLZ	17048.3	6157.57	103888	16.1736	8149.02	18977.6	1235.39	161.803	13.2549	783.812	3346.99	226.29	66.0068	127.405	3307.74	142.884	53.3089	7461.03	81943.6	86.7496	11094.4	73.195	121016	959.713	28.8467	8553.56	90.5639	36.749	36424.1	11800.6	3888.41	67800.9	323.173	3298.39	87.9529	768.196	14997.9	8945.61	19.4811	13762.4	124.209	1265.97	5758.89	9.09208	58.3665	232569	16.326	708.716	389.004
BOL	148158	8647.91	287863	23.4456	150337	293450	72585.1	4743.75	276.473	1440.76	219273	1420.79	1054.33	2137.24	4780.43	1148.88	300.858	747010	1.37045e+06	40171.9	274983	2428.26	2.13161e+06	2841.55	861.226	676988	257.662	634.435	405424	438.407	343871	1.43803e+06	559470	553490	324.341	132657	75524.8	76821.6	251376	35003.9	36210.7	25204.1	195450	20.3431	142.497	6.35479e+06	145090	385449	10558
BRA	8.89952e+06	5.28775e+06	7.78001e+06	392.856	3.92602e+06	8.42186e+06	243643	239475	144317	565931	431810	229028	209518	452926	122024	134190	160246	2.12272e+07	4.9203e+07	63816.8	3.83862e+06	159000	6.74526e+07	2077.13	85445	2.60225e+07	2121.35	237173	2.22477e+07	4.52808e+06	161624	1.0729e+08	1.55329e+07	1.25205e+07	951.619	5.64875e+06	9.51318e+07	2.59809e+06	3.88697e+06	696827	84814.1	2.23133e+06	1.85428e+07	231477	172.102	2.10712e+08	745728	1.90092e+06	8468.45
BRN	35043.9	83844.4	2673.43	12.3732	12033.7	51725.7	15073.9	7131.23	639.361	298.064	102378	1597.25	2207.6	969.127	327.493	539.825	634.212	49299.5	876177	38398.4	195581	91.6423	806980	4372.8	33529.3	195802	37.0592	3459.79	301092	11574.3	7328.66	647396	26495.7	69244.8	674.48	36825.2	428133	5417.46	4002.01	3008.28	11169.6	2616.42	146361	8396.85	586.127	3.02805e+06	214.07	828.853	879.031
BTN	6213.83	128729	1296.49	42.3303	4010.42	3913.77	399.968	520.481	323.06	3.44182	2031.01	60.5329	22.2099	1272.69	990.067	50.4408	9.25652	25821.1	292623	535.15	22542.6	50.1375	381999	18.8099	497.819	9890.41	47.2616	6716.85	99938.5	32723	8555.69	44369.1	85344.8	23257.7	11.1558	4632.45	32718.7	2349.2	4534.21	1786.41	1651.39	326.756	12939.9	11.2296	55.099	373277	1442.03	114.967	36530.9
BWA	4238.57	27787	278158	10.469	3661.55	48808.2	2716.8	275.249	95.7672	644.778	1281.64	645.748	9.47199	102.05	5147.81	71.331	180.842	18493.5	1.44035e+06	10585.3	150616	82.2683	1.51117e+06	3426	7216.16	328354	205.566	2622.76	230363	1503.23	10473.7	405736	9284.3	326958	147107	141793	778336	3064.89	73.1133	12036.2	2219.9	48541.1	215484	4312.44	178.28	4.80189e+06	917.328	40795.1	7974.37
CAF	2388.7	5241.56	13468.8	19.6588	1499.59	28981.3	528.421	52.3369	3.27378	125.803	1626.63	44.3788	12.4689	160.639	873.997	9.85974	8.57927	25751.7	16770.6	2620.82	3535.35	2.29794	23562.3	140.146	23.1633	41244.4	40.2969	1486.42	5699.17	77.7432	2222.79	98060.9	42.2381	67104.3	34.1055	30905.8	81020.6	7434.83	1446.39	1135.02	1333.05	91779.4	8099.28	4.54712	170.696	161038	7849.67	43.3751	9661.9
CAN	8.18507e+06	5.0704e+06	1.32554e+07	1613.88	1.27283e+06	1.87721e+07	55228.8	46530.1	74405.7	79011.8	104173	84150.7	44551.8	159209	59348.7	72657.2	39608.7	5.17726e+06	9.53896e+07	491635	2.02673e+06	143441	1.34938e+08	420821	614970	1.84588e+07	995.653	400272	1.27832e+07	6.94528e+06	4.19274e+06	1.02383e+08	7.03435e+06	7.15366e+06	1470.33	4.06895e+06	9.28295e+07	1.93025e+06	195548	1.71434e+06	17795.3	1.95528e+06	1.72059e+07	122726	1693.05	1.8309e+08	164535	98377	3557.82
CHE	5.93233e+06	2.8417e+06	1.51305e+07	1615.91	290839	7.83437e+06	12715.8	36688.8	132052	12672	28645.2	11376.3	10220.5	26963.8	14872.9	46559.9	29664.6	1.78824e+06	2.32926e+07	54670.5	1.46732e+06	57518.7	3.57159e+07	64319.8	52865.1	1.37796e+07	5391.68	24831.8	4.90767e+06	341063	1.05174e+06	6.5253e+06	5.71613e+06	7.65401e+06	325.214	1.37855e+06	2.96955e+07	1.85683e+06	63260.4	29100.6	143741	26332.7	9.06397e+06	42833.4	353.007	7.90605e+07	117411	10786.8	2245.17
CHL	940504	1.7825e+06	4.5296e+06	1307.85	93966.7	1.44892e+06	274588	11487.9	18283.8	44449	255118	11270.2	94089.7	42395.5	38714.6	43131.9	21751.3	2.35477e+06	1.25179e+07	120336	948409	131160	1.70515e+07	36100.4	53478.5	3.91905e+06	127502	382084	3.49005e+06	379345	1.31462e+06	1.72114e+07	2.63297e+06	1.64731e+06	251.183	2.04291e+06	9.67935e+06	164762	19621.9	136937	262545	47432	2.06792e+06	21036.5	7301.65	1.6974e+07	30590	40481.8	51039.4
CHN	1.84698e+08	2.49592e+07	6.63942e+07	264731	1.13861e+07	1.28042e+08	475077	439533	302057	301688	348822	416979	378662	547338	320495	1.20712e+06	354929	1.64416e+07	1.70389e+09	912937	2.99199e+07	246713	1.56244e+09	804713	1.11215e+06	3.588e+08	202793	4.64743e+06	3.74571e+07	5.25523e+07	3.21234e+07	6.3548e+08	1.25563e+08	2.21014e+08	291479	2.99847e+07	5.89502e+08	7.37807e+07	7.62339e+07	8.87041e+06	3.77015e+06	1.32809e+08	8.88146e+07	127817	230107	9.03625e+08	2.82518e+07	1.65633e+07	1.03915e+07
CIV	203049	126717	363072	414.995	2251.93	735079	4024.92	2621.46	403.854	2224.42	11288.5	1929.7	543.064	5770.42	1264.83	3900.68	714.823	87806.4	1.7063e+06	144140	104246	962.536	1.97867e+06	612853	5058.71	1.26857e+06	1297.41	29624.1	83486.9	160171	597298	4.25917e+06	268010	886997	766.678	518502	351075	588386	360289	102083	363676	126994	178574	26.0655	1046.97	3.17463e+06	201307	118627	1.96335e+06
CMR	72918	188219	869807	201.841	14094.9	251865	494.119	1145.47	183.069	658.172	2392.71	1291.86	753.553	1760.76	999.582	4120.5	2222.88	42608.4	2.18652e+06	8993.91	142823	93.1826	2.80019e+06	1109.42	3145.08	367060	6444.41	73691.9	73628.8	152094	608617	1.63626e+06	259970	415559	916.599	106712	251415	92610	370179	19545.9	590.114	21485.6	231689	9.04565	353.408	3.0676e+06	69254.3	644122	752529
COD	89138.2	67838.2	984850	34.7571	12616.7	122066	1536.93	638.329	238.244	222.015	2889.97	7465.1	465.708	571.707	3261.67	143.73	510.597	9854.95	1.52742e+06	431293	151857	20064.6	1.18333e+06	20463.6	530.03	325084	252.326	55928.1	9148.64	1.13826e+06	353421	1.60315e+06	47930	473258	96.577	37938.3	17107.5	135108	421810	2663.27	8.56363e+06	28912.9	127166	12.787	145.163	1.77065e+06	154941	107540	6189.13
COG	5470.54	29248	51369.6	416.662	1143.82	107982	1779.56	1328.74	29.6657	804.385	3845.99	2814.37	709.232	654.93	264.26	298.938	2543.79	26627.4	505191	11506	41682.3	2496.6	561915	410.604	1900.84	121023	33.4646	831.724	19565.1	2556.24	61353.2	727766	15610.5	140473	34.6026	54384.4	23756.2	104115	137781	12387.4	77919.4	5403.31	61216.3	33.2588	28.5796	870400	7611.16	116.127	30.5142
COL	972180	1.00349e+06	3.66051e+06	78.6987	223034	4.33392e+06	5637.44	3726.07	2900.1	16345.2	20342.2	7474.16	5348.73	8796.67	15968.7	22494.8	6683.3	3.71329e+06	1.09138e+07	28290.7	698387	48702.1	3.01361e+07	50221.5	303678	4.72188e+06	30.1852	60562.2	6.17957e+06	261118	3.25181e+06	1.51205e+07	3.00717e+06	904857	131.322	946080	1.27725e+07	173087	330271	156764	406810	7311.48	2.80655e+06	7268.34	20.4756	3.46785e+07	1.17899e+06	173399	385812
CRI	499649	348037	1.14999e+06	53.7559	58985.1	242569	10327.9	7293.67	2466.75	4922.91	32412.4	2345.83	5060.26	17598.3	6641.09	3441.02	4531.64	247940	2.7333e+06	17060.8	142626	16110.1	3.48681e+06	16332.8	54843.1	701434	111.19	7944.47	1.27592e+06	350645	392506	5.22992e+06	8726.37	273781	108.179	176752	2.21761e+06	225135	2313.61	35238.3	7330.59	202117	445730	53.8176	8.86928	2.74522e+06	1671.8	228.976	33897.7
CUB	4787.96	35121.7	1.30836e+06	91.887	31535.7	1.46049e+06	3850.14	3327.67	512.167	10523.5	5262.69	2893.67	205.823	1804.78	914.706	38.5876	370.733	492416	4.77848e+06	1546.81	169455	2233.64	4.88051e+06	7127.58	268418	225399	189.876	401.733	1.37725e+06	1624.74	62075.3	1.32607e+07	2097.92	442600	107.181	375737	1.1452e+06	110393	43716.2	461.588	310536	24564.5	207440	9.68728	150.323	9.69221e+06	75769.3	82.7978	34848.7
CYP	101321	471244	559851	208.882	28096.2	907072	1617.82	947.949	2039.55	479.13	8744.16	1449.65	2047.78	1755.44	65896.1	16078.1	754.236	75031.6	669471	5597.21	120050	1990.14	1.20859e+06	9767.7	6995.78	243167	536.032	320.018	296940	243024	140178	1.3251e+06	8075.7	144247	1681.18	233398	971212	89705.9	2262.81	92153.4	14111.1	79964.3	214290	212.168	94.5527	2.06634e+06	5895.92	15696.6	9348.28
CZE	2.61461e+06	488094	5.40426e+06	466.114	333741	3.27344e+06	47345.4	18811.1	9004.87	7895.33	172778	6329.67	16219.8	26639.7	6846.05	22287.1	7799.37	352313	1.02413e+07	68841.7	411879	59500.5	1.15576e+07	38260	30339.5	5.98497e+06	991.428	14564.3	2.4363e+06	5.09498e+06	1.08458e+06	1.12036e+07	1.20396e+06	2.55663e+06	6183.72	1.59519e+06	4.89864e+06	343190	6568.38	47941.4	17366.8	11421	3.49074e+06	3149.96	411.378	1.74393e+07	29381	37004.5	2711.6
DEU	3.27055e+07	1.38817e+07	3.90731e+07	5020.21	1.52544e+06	4.97609e+07	837767	323511	169019	971449	3.00489e+06	232973	172254	806518	577872	698045	123542	4.23262e+06	1.09798e+08	1.7894e+06	6.52095e+06	568457	1.42073e+08	1.53344e+06	1.75627e+06	6.51724e+07	118438	80033.4	2.92478e+07	2.99437e+07	1.36876e+07	1.66767e+08	3.5752e+07	3.6126e+07	10579.9	3.69939e+07	1.16048e+08	3.79907e+06	303823	112183	555251	655074	5.2072e+07	199774	35313	2.62193e+08	1.65001e+06	1.70606e+06	62345.7
DJI	5935.86	25873.6	21489.1	35.955	6927.62	15385.4	1482.36	1059.12	991.059	1904.33	7795.65	5411.55	109.844	2207.37	1643.77	403.301	1695.28	28779.8	21289.1	25567.3	55891.9	129.82	29950	3371.42	228.787	54255.9	285.605	11.8215	55687.3	22738.2	14279.3	105306	66030.8	98583.7	109.576	45693.9	14954.9	1493.88	7413.08	12468.2	3173.03	597.568	31067.8	11.2717	152.536	312570	1094.14	487.21	16.227
DNK	5.75295e+06	949547	2.49885e+06	505.567	4.03603e+06	6.443e+06	17036	5386.01	7675.47	42821.4	48176.2	9610.51	11852.3	6505.42	31403.2	37652	7571.15	335497	1.40383e+07	42527.3	194543	31080.9	1.64483e+07	38716	810019	4.25318e+06	579.632	39217.1	1.62817e+06	1.35174e+06	850546	2.13289e+07	1.64865e+06	1.43454e+06	1667.57	1.00214e+06	1.11483e+07	233072	129576	480745	26925.1	18966.6	2.96011e+06	3021.27	202.343	1.91316e+07	36763.3	346214	19466.6
DOM	3766.76	212903	1.15173e+06	87.094	34421.7	463929	4465.25	614.653	81.2026	893.302	2570.48	2226.83	228.282	2026.51	4262.28	12.0184	188.305	296807	5.69208e+06	7347.93	86241.5	138.54	6.7493e+06	8563.86	2379.01	184906	1710.86	48067.2	1.20982e+06	982.321	11790.4	7.02253e+06	22598.1	2.41415e+06	630.137	418257	4.95908e+06	78506.6	52487.2	216278	3026.77	67256.2	489271	202.953	224.913	4.69999e+06	30412.9	10073.7	30684.3
DZA	8191.05	3.18355e+06	253642	1906.34	14092.2	439166	281418	102276	7875.48	5570.19	420004	38692.1	12959	33742.4	10025.5	9919.42	8483.38	277465	2.12638e+07	275590	1.08784e+06	601.433	2.00756e+07	58063.2	218021	3.82602e+06	2769.58	35319.6	2.49221e+06	192.714	35668.3	2.18689e+06	9931.55	2.52469e+06	550.711	2.2689e+06	8.26293e+06	89198.4	510095	159858	22281.6	27119.7	448301	12.1341	4645.05	2.70471e+07	156309	105875	561538
ECU	342821	701553	658705	214.411	261200	379084	29635.4	12236.3	42.2654	1050.81	196495	3516.76	1823.4	9502.17	3800.44	1138.61	588.274	739369	5.84707e+06	210123	286492	1333.83	7.38373e+06	13456.7	146.681	2.91962e+06	151.139	2521.6	2.06736e+06	1807.6	74736.8	7.29092e+06	1388.93	1.29326e+06	214.64	1.27594e+06	1.06788e+07	136084	2537.74	197912	15041.8	34154.8	686345	7.07235	140.428	6.63845e+06	10227.9	3206.07	27800.3
EGY	848947	1.3377e+06	123544	43018.6	56295.3	1.82001e+06	3202.67	89390.2	37849.2	337.947	1.26175e+06	5649.06	17723.9	44066.3	6656.71	37061.5	5428.16	1.29995e+06	9.69271e+06	4.31516e+06	3.21966e+06	365473	1.52187e+07	1.10472e+06	9480.05	2.16752e+06	235.601	160992	3.17366e+06	2.05078e+06	3.4073e+06	1.27658e+07	2.86372e+06	3.57065e+06	166581	2.88129e+06	1.80433e+06	702294	4.24425e+06	261412	1.13355e+06	1.80399e+06	1.36187e+06	1.76998e+06	149.922	1.93677e+07	901373	6.91402e+06	338846
ERI	1649.86	2575.66	45466.2	19.7495	5785.97	20506.2	4403.52	419.843	6.13063	10.8114	1094.13	107.169	131.99	864.948	189.098	5.31895	101.118	10444	20974.2	226.448	10359.5	7.86628	31218.8	112.163	25.8879	761.076	40.2304	42.9625	52808.2	20.5815	123.672	109413	125.205	2932.15	27.0836	2314.53	35530.8	6717.54	5.18645	2073.75	10343.6	680.885	432.507	3.12369	169.508	301735	3184.61	43.3792	64.5472
ESP	1.47823e+07	4.14017e+06	1.34426e+07	3459.82	104624	2.85958e+07	130105	69203	38544.8	75822.7	461544	53499	28197.5	75244.5	72922.6	116442	17559.8	2.76948e+06	5.01457e+07	185793	2.21963e+06	283345	6.52271e+07	136040	718493	1.06618e+07	6619.24	762417	1.25065e+07	6.89817e+06	5.40316e+06	6.76056e+07	9.49908e+06	7.59487e+06	184559	7.9618e+06	3.35285e+07	5.92139e+06	2.14402e+06	1.25874e+06	250283	47131.1	1.58993e+07	11740	1268.31	8.36848e+07	268924	118091	75163.8
EST	294778	120188	887689	33.1965	24183.6	623083	2404.94	1186.97	576.428	4295.51	4981.81	412.737	419.484	1765.52	510.876	9323.9	514.165	52159.8	1.90573e+06	6484.91	44778.4	15013	2.13519e+06	3877.09	14243.3	482970	118.319	8988.67	130546	82504.8	120064	1.645e+06	390197	253560	2375.03	160102	680462	42727.7	10265.1	18269.1	3460.21	4050.1	447644	465.389	110.808	2.37738e+06	3595.88	1274.54	2387.68
ETH	694267	232594	982766	27.6334	71309.1	189685	47564.7	54453.7	17079.3	8839.69	342124	21716.6	6940.41	13681.3	15413.3	29227.5	1733.61	360991	6.7771e+06	130280	2.23857e+06	315.617	1.25853e+07	41669.9	2412.6	1.14613e+06	165.486	17067.4	1.00165e+06	23656.3	411265	1.29077e+06	157134	888693	341.479	557886	578325	37250.8	258694	4831.68	236709	42322.9	251560	231.932	83.5671	1.61713e+06	1.38908e+06	2.18376e+07	543308
FIN	1.77826e+06	624053	3.41181e+06	929.805	70078.3	5.50254e+06	13127.3	4880.59	6565.54	18451.2	78163.1	13879.7	3655.7	11193.5	15991.8	19060.8	6136.75	633779	1.44223e+07	135362	443812	27922.7	1.89472e+07	64222.9	245929	4.33487e+06	8981.96	1876.13	3.0288e+06	191227	679929	1.3312e+07	2.79932e+06	1.80751e+06	937.525	1.30158e+06	6.78953e+06	836419	153965	51431.2	43334.9	25706.4	2.28471e+06	468.082	1591.57	1.70875e+07	110951	84649.1	33460.5
FRA	2.7509e+07	1.20421e+07	4.17654e+07	2060.36	4.61905e+06	4.60031e+07	125950	27436.5	82349.7	40525.7	156818	11151.8	41092.5	60966.7	21904.3	84345.8	46938.1	8.13189e+06	1.19606e+08	1.18378e+06	4.03849e+06	52220.2	1.53847e+08	697413	931836	2.28749e+07	3237.72	907533	2.10254e+07	3.37174e+07	9.72669e+06	1.29032e+08	2.22948e+06	1.11426e+07	15971.6	1.15056e+07	6.97002e+07	6.34991e+06	718828	328434	322096	2.77964e+06	4.34003e+07	124126	2193.82	2.18144e+08	402729	517162	130818
GAB	3857.86	64316.3	174973	46.8055	1606.98	77163.5	2649.2	587.573	24.6356	82.0708	841.545	6503.53	285.108	447.355	290.011	88.7658	416.979	21707.7	276903	5484.21	39737.8	54.2078	474088	388.883	477.172	183204	39.985	1303.18	51607	21301.7	40457	499812	68832.2	121883	35.1869	25559.3	56399.8	64779.6	104027	37204.9	14047	7021.67	39257.8	7.84375	169.212	943647	4415.58	51.5231	87.6932
GBR	4.64787e+07	1.72612e+07	2.48944e+07	16921.9	698187	5.62509e+07	192713	59605.4	42192.5	77528.9	506071	38393.7	89647.2	93648.1	121092	100542	95319.4	2.90599e+06	7.97932e+07	327160	4.78016e+06	55627.3	1.41367e+08	1.83452e+06	191754	2.87142e+07	16975.4	312263	2.02491e+07	1.50146e+07	1.13709e+07	1.53036e+08	1.94541e+07	1.45074e+07	9724.43	1.56902e+07	1.18549e+08	3.28228e+06	171784	2.41542e+06	628606	157705	3.16477e+07	15895.9	27595.2	1.84692e+08	438816	1.38257e+06	219803
GEO	4325.87	34949.3	382339	956.402	16759.4	55235.1	6650.01	8390.56	474.766	2959.38	4674.01	3961.86	727.576	13496.8	1417.95	318.014	1287.71	72445.9	1.01688e+06	59076.7	93893.1	912.963	1.20168e+06	6495.45	38135.6	376000	10947	13.3443	266795	1061.81	10940.7	1.36487e+06	827.431	236771	80.2599	47042.7	1.72469e+06	27365.7	7208.49	10514.7	43558.8	156.991	111013	9.73237	130.188	1.44746e+06	394.36	5303.75	23.9794
GHA	66088.7	296244	561676	3431.24	10281.6	399648	20677.9	46047.6	406.891	1831.51	72111.8	3493.88	1901.21	16210.7	3548.4	111591	6226.38	60134.1	3.63017e+06	154385	333188	1156.36	4.28764e+06	5437.83	1946.48	904051	2805	13247.6	49067.7	139317	1.22079e+06	5.8976e+06	685739	983321	152.937	450742	391028	115392	525829	175772	305895	416182	695794	6210.55	208.169	3.55328e+06	30985.9	557665	1.01012e+06
GIN	146661	42515.7	19565.1	34.2684	3631.86	90155.6	1630.57	1750.84	1754.04	87.8544	1968.18	836.082	197.399	263.029	689.27	3126.64	628.716	65533.4	96885.2	87137.1	131334	995.393	271975	39768.7	390.856	161195	75.0142	2656.7	46056.9	1696.52	224452	310543	36697.4	198820	43.1824	66231.2	224993	16152.6	226586	36896.6	151066	193879	69698.9	32.4012	171.091	688584	3168.43	439643	190701
GMB	11477.4	3789.63	12921.7	19.9152	47.616	4732.34	466.951	114.376	17.8497	67.238	2359.95	91.669	26.1711	30.6458	407.244	83.0962	119.195	15476.6	140480	2571.88	35438.8	4.09783	238284	495.731	126.722	11569.9	40.2934	9964.31	46561.5	2923.18	17538.5	45913.7	16226.3	2268.26	27.7968	7875.77	14649.7	8284.16	44208.5	9541.23	52024.9	1256.38	8644.25	4.92089	169.136	77527.5	8699.74	67341.9	214.824
GNQ	4106.85	10928.9	219731	296.101	27845.7	68009.6	1669.26	2434.9	27.0904	235.913	2766.41	2147.56	307.772	368.99	656.905	462.893	28.9615	60522.9	148206	13068.1	74551.6	69.5006	298505	1876.72	312.359	251171	1473.73	867.688	273086	1045.82	4905.38	357846	1560.87	29485.3	587.705	291281	573662	49654	2934.36	14999.9	1053.37	25389.4	60373.3	10.7892	356.886	1.85456e+06	210.759	723.375	44.9114
GRC	3.14566e+06	1.39936e+06	2.56455e+06	2769.38	80161.8	3.11092e+06	10930.1	6680.4	6278.53	4581.66	14208.6	5664.4	8935.23	40633	8299.38	23080.8	7025.21	589061	2.97188e+06	21461.9	477066	49957.4	3.59024e+06	19269.5	133083	1.65978e+06	2510.1	79006	5.70062e+06	521337	1.24282e+06	1.00611e+07	4.20172e+06	790508	1363.72	698237	5.54816e+06	272905	205147	28339.9	63506.6	17803.5	1.3668e+06	3130.88	3702.92	2.06148e+07	138372	66435	2284.75
GTM	31394.5	140754	390482	75.6957	117837	4.87219e+06	4665.51	2242.45	619.446	508.616	1782.43	3133.42	687.773	6949.23	1756.64	6464.13	312.482	791971	2.4057e+06	23098.7	537477	2202.55	3.04506e+06	100847	98.8317	836055	73.4568	66957.8	964382	466903	1.24673e+06	2.83095e+06	796594	2.14872e+06	199.108	381565	1.60374e+06	35953.1	165065	111679	493791	565.629	431235	28.6142	51.1414	5.61285e+06	148838	286124	859.236
HKG	427000	1.70231e+06	3.31686e+06	566.473	507752	977779	41922.3	35519.1	56951.6	27680.3	86485.7	50432.3	38148.9	71465.4	55719.8	135854	25807.8	2.18535e+06	7.23885e+06	148402	762359	1058.28	9.60221e+06	15459.6	105206	2.18267e+07	1431.3	313502	4.49689e+06	107890	5.15246e+06	7.48236e+06	692687	1.15536e+07	1117.02	2.26994e+06	7.86508e+06	5.17581e+06	303178	306361	117220	393849	1.99759e+06	2409.47	1015.56	2.72461e+07	62257.7	4723.6	7420.79
HND	437388	12495.9	737727	74.1719	28964.3	390663	8867.72	4697.84	1636.42	1245.42	1562.14	1678.5	1254.75	2143.53	1036.2	347.49	220.208	370320	844412	1716.31	278033	322.448	1.46969e+06	3390.53	210.579	361106	81.3809	142986	748220	133.442	499670	1.34895e+06	7657.8	1.47233e+06	562.238	17230.7	227786	5942.64	46204.7	69938.3	24077.7	23412.6	391373	1822.01	34.7615	1.50294e+06	11679.9	3449.78	4928.07
HRV	661097	110910	1.01515e+06	2862.95	31073.2	1.09793e+06	2711.63	1250.72	3560.31	763.512	11838.1	2375.68	1596.23	8700.7	1036.17	2307.68	801.556	332175	2.22123e+06	73904.5	108063	2210.64	2.83979e+06	41938.2	126141	774994	55.5579	16887.4	455316	20085	265458	2.47773e+06	1.0585e+06	710248	123.694	412363	2.10456e+06	94579.4	112635	2863.93	56326.3	7710.67	706895	591.438	155.227	3.97078e+06	25680.9	16331.2	5234.77
HTI	3832.75	26320	382378	19.5905	5072.15	167301	6606.8	3735.33	9.06478	274.624	99240.3	1005.9	7.49466	4884.74	3135.43	35.1194	418.553	20109.3	526967	14391	24166.7	65.458	704589	3466.02	1381.66	78471.8	44.8919	3346.66	87274.1	1783.7	14896.7	511902	2541.87	62960	85.5868	122436	1.5829e+06	22998.2	1013.55	6685.57	1.80454e+06	129938	29715.5	7.13446	169.169	832969	93771.5	135201	22212.4
HUN	1.52736e+06	1.20572e+06	2.0084e+06	574.586	403310	3.32841e+06	21694.7	19130.1	9262.93	5488.74	47990	2976.23	6028.51	40907.5	10985.8	24632.1	1729.49	96014.8	6.61516e+06	41705.6	738902	1302.76	8.65132e+06	34870.4	240234	3.30114e+06	161.344	7366.82	1.45762e+06	971406	394036	7.39239e+06	318649	1.61282e+06	703.793	1.06683e+06	3.28388e+06	159104	13908.7	84047.3	21284.8	69399.4	1.65466e+06	121510	75.2893	1.36393e+07	30085.8	95639.3	5230.39
IDN	3.46506e+06	1.70595e+07	1.73554e+06	42.3394	1.2566e+06	2.92394e+06	8509.13	5011.37	16905.3	40182.9	37883.6	3731.71	5984.08	3674.77	49439.7	495980	2299.56	1.9776e+06	1.46951e+08	5755.16	4.2815e+06	6736.42	1.09725e+08	11506.1	4.37595e+06	1.77299e+07	193.547	5.78501e+06	3.08666e+06	3.38397e+06	9.37488e+06	4.61823e+07	8.96947e+06	5.86775e+06	22.2261	3.29768e+06	3.25815e+07	7.09378e+06	1.96736e+07	975767	85350	1.61343e+06	5.36208e+06	47565.8	165.528	5.51537e+07	2.19792e+06	121929	780182
IND	4.54287e+07	5.10891e+06	2.08926e+07	502.007	261569	8.82939e+06	657399	337943	271936	116365	2.5076e+06	259419	254131	1.19968e+06	205260	648789	415960	1.47226e+06	1.92461e+08	131470	2.84964e+07	29408.4	2.38756e+08	21818.6	646501	2.8135e+07	9893.52	3.17945e+07	6.24683e+07	1.61172e+07	1.63846e+07	1.49632e+08	1.84306e+07	5.01665e+07	263.481	1.24623e+07	9.8775e+07	5.99957e+06	1.88774e+06	182484	486559	167158	1.79485e+07	14124.6	113.936	2.14376e+08	9.62033e+06	4.56522e+07	7592.95
IRL	4.01804e+06	1.48397e+06	2.31838e+06	55669.6	125547	3.34624e+06	120634	13246.2	16673.8	143348	101031	11230.9	5121.59	33855.5	182731	135473	6457.61	687844	1.2507e+07	81113.8	341363	1477.39	1.55666e+07	68996.1	294116	7.33919e+06	7451.8	15902.1	716083	1.61222e+06	1.06801e+06	1.1692e+07	173229	1.92043e+06	52026.4	1.19222e+06	8.46057e+06	173222	47832	32832	46042.5	38826.9	9.97752e+06	82203.9	2700.23	1.50868e+07	9500.32	4568.98	42472.4
IRN	4.34092e+06	1.35286e+07	91963.1	1812.07	32905.4	4.16611e+06	1.95465e+06	4.04618e+06	866746	5.47813e+06	3.90398e+06	320393	140511	2.50535e+06	154735	4.77006e+06	31735.1	1.68859e+06	2.74488e+07	3.17827e+06	5.78908e+06	1353.21	3.10064e+07	1.01369e+06	1.97983e+06	1.71742e+07	67283.4	508923	4.32691e+06	1.04929e+07	9.43161e+06	2.69749e+07	105546	6.50549e+06	271.893	1.11473e+06	1.73066e+06	1.32844e+06	2.535e+06	702391	255125	91077.8	3.44336e+06	10.2487	206.638	3.99371e+07	105955	9.12583e+06	675741
IRQ	339210	955789	2.14317e+06	1152.73	124038	1.93658e+06	15781.2	6797.42	668.092	10045.5	73415.7	3207.09	4590.08	2551.7	18485.8	55750.2	6660.9	292893	9.74566e+06	38544	2.41487e+06	4013.45	1.70371e+07	22641.4	411374	3.83563e+06	657.687	15676.6	1.90158e+06	1.10795e+06	1.17924e+06	7.7659e+06	328656	4.93447e+06	56608	8.15203e+06	1.64167e+06	448890	356255	975089	81543.4	306933	7.39242e+06	12.3246	477.348	2.98008e+07	2.29941e+06	26039.2	150527
ISL	600413	216143	175774	42.878	38762.5	252740	474.035	343.38	367.143	142.359	922.25	459.13	259.79	970.6	158.435	187.342	72.1772	49437.9	1.37693e+06	6927.71	21884.6	309.068	2.21824e+06	8343.47	3561.53	240837	21.6011	520.137	348303	189011	58420.9	1.77526e+06	1258.54	76928.2	101.085	155137	336585	31844.1	837.574	2910.59	14824.6	1790.9	286764	101.241	9.50416	1.5799e+06	3082.43	568.061	143.555
ISR	3.72016e+06	4.8828e+06	1.44119e+06	4890.09	59333.7	6.79982e+06	13055.7	6116.65	15164.9	2271.64	39746.8	3926.42	16780.4	15968.6	14588.8	3033.55	10378.6	2.209e+06	2.55626e+07	40570.7	1.10974e+06	4963.08	1.29787e+07	102103	408571	1.05896e+07	352.301	6957.43	3.45859e+06	1.45774e+06	1.73067e+06	2.83087e+07	3.1149e+06	1.01721e+06	394.525	2.51448e+06	7.53352e+06	1.12298e+06	347631	474559	129545	167498	1.18517e+06	446.801	90.5532	3.59241e+07	29120.1	24123.1	12235.5
ITA	1.76922e+07	6.97808e+06	2.46002e+07	458.208	407415	2.65998e+07	330178	153597	98963	124168	599313	88851.2	114838	258148	165608	139487	49666.2	6.86352e+06	5.82247e+07	1.40061e+06	5.38032e+06	272462	7.67521e+07	735063	459719	2.28271e+07	362.76	804576	2.3815e+07	1.47666e+07	7.54034e+06	7.68822e+07	1.1648e+06	1.24429e+07	2177.72	1.30497e+07	4.49109e+07	7.18234e+06	862590	91453.7	394865	156659	3.42878e+07	2.88259e+06	2862.33	1.42306e+08	875462	18166.7	9818.93
JAM	11638.3	169544	182579	9.59158	14184.6	235804	575.08	1267.97	35.6574	45.0754	2289.39	2540.11	215.865	188.288	415.111	43.9275	1095.63	27158.4	829680	11586.1	35656.1	105.474	1.20519e+06	9028.71	120.88	147720	56.199	687.228	263387	199528	185914	1.08695e+06	255324	148912	31.5478	33838.9	690967	137567	21287.8	24482.8	1243.45	58070.5	77034.3	32.5882	27.4507	1.48757e+06	24837.9	1203.24	67966.7
JOR	140969	258471	31715.7	61.9257	23572.8	296895	10853	4821.68	12487.4	535.644	105800	1218.8	1007.59	6433.22	624.172	15349.4	760.472	196501	2.17648e+06	37827	212403	486.669	2.46006e+06	11580.5	168158	607096	3117.33	7305.66	552398	396910	110360	3.75507e+06	415667	446442	685.684	269249	215978	47820.9	109471	51654.6	15113	44424.2	871494	34749.6	208.831	6.41558e+06	79177.1	5760.78	4656.69
JPN	3.11039e+07	1.69763e+07	9.24126e+07	882.548	4.44623e+06	6.35861e+07	528639	1.03185e+06	403724	517972	1.39394e+06	375497	374673	640523	595600	771211	429005	9.68558e+06	2.75098e+08	1.75692e+06	6.2083e+06	70283.7	2.94413e+08	116988	303450	1.09677e+08	2998.93	1.6038e+06	3.53893e+07	4.08474e+07	1.49981e+07	1.99284e+08	5.66563e+07	5.34988e+07	20662.9	7.22861e+06	1.93264e+08	3.73837e+07	1.53026e+06	3.33133e+06	883658	4.94799e+06	7.61481e+07	48574.3	1536.62	3.23224e+08	857022	20232.7	892338
KAZ	1.48458e+06	891487	1.65532e+06	62259.1	101090	2.55599e+06	34058.6	22463.1	369341	3723.84	358532	32742.3	211150	489280	4182.67	13369	73954.7	1.82096e+06	6.52726e+06	129417	686730	3484.8	8.96569e+06	367835	1.01904e+06	1.76117e+06	46551.5	10187	2.80235e+06	625201	421762	1.19502e+07	650629	1.94264e+06	1033.58	1.30569e+06	1.79225e+06	87836.9	112681	1.06401e+06	111275	26271	1.04447e+06	25890.9	10720.5	9.1913e+06	737175	98632.7	374487
KEN	1.63205e+06	316184	2.20478e+06	20.7207	59233.2	415823	37171	7153.42	95.3792	689.119	95260.2	8582.22	1224.96	9771.56	594.065	40348.1	1552.1	1.05968e+06	5.67809e+06	2256.45	1.18987e+06	91.0618	7.65056e+06	288.452	52.6762	1.15414e+06	136.56	39051.6	2.29038e+06	264730	707771	8.23582e+06	274649	630533	416.768	1.0238e+06	456998	178446	503267	77832	2636.34	29519.1	665886	29.1005	151.09	5.42566e+06	744121	12383.5	1.2925e+06
KGZ	17940.3	741783	121650	48.1029	9276.54	16967.5	965.142	369.07	118.409	114.232	369.329	331.793	39.1352	6621.8	1135.6	102.249	11.8558	105754	306264	4396.67	101000	10.051	1.06502e+06	447.607	27.0941	16573.9	89.7421	140230	425724	6363.94	29140.7	855214	69162.8	21643.5	60.9739	40114.3	18700.6	3004.2	27725.8	2641.43	3388.56	199.068	31490.2	516.893	91.1752	520770	39912.3	333106	14408.3
KHM	179219	117654	266254	89.1373	20534.5	84085.2	10405.7	40034.4	1704.31	9085.26	5019.14	23555.5	1405.29	4855.48	3650.51	2720.92	3095.81	100875	1.96069e+06	36409.6	10094	818.626	2.74779e+06	38562.6	1928.94	375766	585.516	50447.7	74782.3	50544.3	68051.5	426411	264361	159540	112.178	245775	410625	387788	1.05642e+06	38825.4	15724.7	47248.5	1.52332e+06	413.107	25.0944	604710	5192.97	793021	33790.3
KOR	1.03938e+07	4.04574e+06	1.32617e+07	1200.59	678745	2.58456e+07	141270	279578	176031	186133	424165	131658	87690.2	166151	270340	276031	55283.7	3.88759e+06	4.04139e+07	95471.2	1.68384e+06	147521	1.69755e+08	208038	72872.9	4.47244e+07	24647.4	1.07772e+06	3.50984e+06	1.09029e+07	1.88551e+06	1.17451e+08	336335	1.54915e+07	1506.72	7.48647e+06	6.03977e+07	1.17681e+07	1.11114e+06	40679	556177	3.11636e+06	1.1383e+07	1.94952e+06	14367	1.30833e+08	310425	6378.17	294639
KWT	3.1792e+06	2.66286e+06	163527	2395.65	5015.7	612157	67881.7	299060	1463.49	1188.07	348334	3705.18	2347.57	31947.7	1588.11	248.028	2099.91	209263	1.11377e+07	561.961	660175	163.928	1.15547e+07	248.299	99111.5	560677	117.943	21129.6	1.85518e+06	825162	2515.73	7.3958e+06	35163.3	260033	7952.85	2.14773e+06	2.07989e+07	276717	24937.5	220064	51312.5	9881.72	2.37179e+06	2.58423e+06	456.042	1.8108e+07	12809.4	52375.7	9095.54
LAO	26378.2	57374.5	538431	51.3142	17529.6	73621.7	9373.73	3924.07	4254.93	953.405	92638.7	10572.4	14462.3	6536.81	2166.16	581.338	1892.15	98976.3	1.86619e+06	366.515	9625.71	278.025	2.47845e+06	668.09	32185.2	197444	428.013	1518.86	14919.2	1805.45	7721.01	410308	135778	68066.7	51.8833	349592	480668	129410	210869	18686.9	87582.6	4563.24	78390	154.999	80.4399	2.25165e+06	43222.1	171168	57704.6
LBN	13557	140632	285362	1761.8	14312.5	1.12651e+06	6226.47	12425.3	5394.84	2476.02	17814.7	2260.9	1164	3877.14	405.902	577.645	2035.66	278968	1.31657e+06	10869	300906	457.765	1.77312e+06	4486.7	403.194	804055	549.439	3041.42	773686	15167.7	23961.9	1.33646e+06	38347.2	337197	1163	456748	2.89025e+06	118929	18199.5	117593	6583.93	720.994	417518	196.209	900.752	7.45436e+06	22538.7	2893.32	990.28
LBR	6422.78	8082.01	21822.1	19.6229	619.94	6700.31	314.195	115.121	12.8815	1467.63	536.604	28.753	5.44499	36.7657	8732.77	97.2887	2.73977	1253.15	2919.43	328.115	4792.02	25.1351	1106.36	103.751	92.8052	13723.9	40.5183	62.278	2825.85	673.383	9051.61	59258	109.901	9204.1	28.6708	3982.64	57873.4	4498.76	17945.4	9800.95	975473	4908.45	1032.26	4.51521	169.205	379816	750.565	107.238	73.9502
LBY	9328.67	79735.6	168573	73.9939	14529	1.08998e+06	1705.8	1044.52	229.048	495.203	2464.49	2296.8	1425.68	6488.54	12443.9	186.24	1532.84	98421.2	1.98304e+06	1339.5	633245	438.69	2.45814e+06	4553.22	351.447	581206	294.29	1993.33	953900	15929.6	3732.11	8.83458e+06	28983.3	1.02921e+06	385.826	16701.1	5.34998e+06	51969.9	33711.2	201473	42226.7	1478.61	42200.1	1168.28	270.645	1.20058e+07	10736.9	26217.5	4906.16
LKA	7611.91	521364	429220	82.587	12533.5	153384	5176.96	7374.66	7339.64	788.52	41376.5	6709.38	1389.79	23687	2772.97	23835.9	219.121	94378.4	8.00625e+06	46591.6	415999	463.615	8.60148e+06	8791.37	830.428	1.623e+06	659.45	33577.9	1.04818e+06	147223	381428	1.18644e+06	424603	421455	1114.12	305377	544146	1.19926e+06	217507	91696.1	4284.26	34922.7	243087	6.1984	146.871	7.02307e+06	117323	43618.3	2129.63
LTU	648928	243723	1.34355e+06	89.4489	27322.4	661045	15264.1	3051.89	21520.2	9925.81	21489.9	5092.51	7383.23	6295.55	42731.7	51102.2	1806.12	101743	2.02872e+06	25990.8	354498	18042.8	2.98542e+06	17695.9	38706.1	1.17082e+06	300.888	5674.49	725733	563408	646096	2.13229e+06	560819	703378	2723.05	624876	999979	104362	52898.2	52907.7	4362.97	15471.7	765672	1021.73	37.2631	3.69101e+06	133904	85129.9	2578.03
LUX	665547	300659	483662	329.304	41378.6	474306	344.744	427.041	346.414	1408.66	2006.66	710.917	326.521	2477.87	1267.89	4940.92	2218.39	145197	3.36738e+06	8081.51	82676.1	2209.2	3.74064e+06	2341.09	9805.1	362340	724.74	16257.6	225949	261842	69570.5	3.05025e+06	74179	144797	1038.53	105203	7.00517e+06	89422.8	28322.7	81792.5	171073	30882.5	166946	694.192	269.758	4.8213e+06	3615.94	21397	3828.55
LVA	388474	327511	628910	123.58	25179.1	899961	6830.31	1667.19	565.921	2412.36	18929.5	928.117	3065.16	1588.78	1204.7	11821.2	356.763	36837.7	1.6675e+06	1065.16	78444.9	169855	1.82397e+06	1252.69	63957.1	514378	42.4126	1027.31	530956	130952	357771	1.61592e+06	354137	301723	953.979	135463	613012	452723	40249.7	129317	19389.1	16130.3	392555	1154.04	11.8357	2.73525e+06	57914.4	47960.5	4522.21
MAR	980858	768424	263945	291.475	44867.8	376907	102393	164448	11247.7	10561.7	24605.8	1411.6	2034.98	73384.7	21055	49378.2	1766.15	824998	6.34711e+06	164210	2.59996e+06	52751.4	8.84559e+06	45560.3	6504.65	1.29489e+06	16008	159937	1.38609e+06	850586	732533	9.50085e+06	1.27704e+06	522587	711.59	1.97001e+06	1.95215e+06	302757	527121	304317	180154	8042.24	1.00844e+06	1378.44	82.509	1.38679e+07	764084	550392	35825.1
MDA	63682.9	23963.6	275400	46.4709	20188	116148	33498.6	14738.2	1961.63	289.71	1227.8	8138.61	12249.2	2362.77	966.653	623.306	314.134	20493.5	1.04432e+06	8755.12	83412.6	1861.62	1.01764e+06	12483.5	44.9624	243645	112.209	328.334	309963	187.681	363745	743629	3396.13	293646	66.1698	131334	221489	47644.8	54068.8	18816.1	3380.95	360.012	171847	10.1475	222.619	867423	27709.3	66184.4	848.03
MDG	99159.2	9980.02	87067	22.6478	2613.84	130674	5656.56	1837	163.128	2347.2	1807.44	1267.74	717.526	278.48	1862.05	5340.73	502.346	147738	630787	12326.2	31349.6	1119.15	1.05762e+06	4519.74	405.546	230953	265.198	91674.6	89389.2	14137	293553	705008	74239.3	53269.2	78.2179	46731.1	9378.29	62934.8	137911	507.33	355627	5069.04	105344	9.68947	104.781	964615	155178	748.207	183290
MEX	4.61042e+06	1.03423e+07	1.34331e+07	364.686	1.91212e+06	7.34125e+06	188680	59735.9	80021.6	220701	1.51742e+06	55768.9	50996.4	2.16967e+06	101871	1.76526e+06	37658.1	1.04395e+07	8.65469e+07	251060	4.6757e+06	138578	5.26609e+07	49349.3	630999	3.05552e+07	6271.56	733847	2.20526e+07	4.99482e+06	60234.4	5.74254e+07	2.21205e+06	1.1989e+07	418.409	9.55736e+06	5.8102e+07	4.0335e+06	1.04071e+06	9.12124e+06	30993.3	2.84157e+06	1.07567e+07	12821.1	115.958	5.98302e+07	105483	22375.7	83798
MKD	649050	7308.02	210170	192.894	9461.13	145498	15166.9	2082.59	97.83	1903.88	999.513	1041.73	26879.2	16083.3	7964.8	4859.52	257.549	78270.7	761305	1463.48	45051.6	306.715	873025	5980.38	11783.2	337050	693.504	33772	429371	1291.99	335743	692611	223561	445869	268.178	682574	8754.53	11743.5	30983.9	6471.21	4706.46	1508.78	124734	13.8765	208.48	285020	54511.4	11620.1	1382.21
MLI	19935	37818.2	342769	13.0171	13180.3	164331	2076.49	2866.87	418.047	1314.57	2588.17	4158.36	180.197	702.182	1735.15	2628.39	43.9799	420799	327991	127053	364050	208.415	721922	34476.7	44830.9	571735	144.606	6408.99	240247	12494.2	151023	599544	144701	599249	106.502	55377.8	62891.5	109398	157329	3669.97	918.419	23754.6	211643	11.201	166.054	1.18515e+06	27406.1	378443	92272
MLT	405296	213916	186259	400.273	10991.4	336449	6638.76	2798.96	221.327	199.112	4265.91	448.424	663.13	976.532	193.321	459.821	140.796	29418.2	429618	2869.87	22703.9	711.046	473564	2445.68	8495.77	170175	39.5305	4188.22	88194.5	57697.6	53400.4	695017	1916.18	62011.4	283.21	50135.4	761957	27096.1	35585.4	1147.55	2004.08	768.391	231746	186.187	28.2974	1.01903e+06	248.075	1046.05	379.543
MMR	267769	640157	89844.1	286.034	62427.1	371762	3483.35	1770.59	405.532	4400.86	225986	1786.7	282.503	713.63	8269.34	8495.51	203.394	430988	3.79258e+06	143863	79841.3	4211.05	5.01259e+06	69970.9	70014.2	1.30895e+06	281.663	396216	757544	32868.6	84559.7	1.91101e+06	207450	738566	1208.14	711098	608725	600397	1.23715e+06	50684.1	3.87052e+06	61242.3	1.52686e+06	33615	942.347	5.8989e+06	4098.37	2705.71	1940.5
MNG	198116	61610.1	172009	37.5848	11876.3	67368.5	30404.2	2671.83	108.546	16001.8	50279.1	1566.54	954.105	23811.4	129739	605.013	289.868	131358	532461	4838.84	99396.1	26.4752	808703	2296.13	1314.42	574468	3779.37	248.281	273450	2383.95	212680	496413	488522	182970	318.281	42960.9	432461	621.676	12033	5142.68	3296.44	797.095	90810.8	6.9849	155.667	1.09528e+06	40646.5	235370	2345.28
MOZ	15824.3	42178.5	59134	48.8986	3054.55	157102	7049.94	51591.5	399.943	51322.5	111317	11900.6	205.27	20592.8	31551.9	13452.3	226.281	38152.3	911371	39640.6	88824.8	2169.84	980057	24035.5	24114.3	837481	1439.5	70999.7	21568.7	8629.76	241567	657423	245286	673911	191.469	549919	432043	49058	266132	31567.5	547534	76263.9	166565	11.5609	187.259	1.65954e+06	5516.38	414137	54428.7
MRT	114653	35663.9	755.713	50.1736	2165.78	36328.8	3723.69	4664.18	26.4295	770.932	11919.3	2306.25	137.321	888.16	1145.07	2138.9	164.124	57192.2	303416	40766.3	89142.6	343.304	653418	10172.7	3122.54	171104	512.582	120177	389954	33284.6	67348.5	225953	39074.3	170268	64.7563	56399.5	40429.1	30011.4	27441	42424.5	1346.08	14410.2	85140.7	8.58834	119.568	596421	92300.8	334.017	186.071
MWI	19833.9	10102.8	321442	38.1897	17823.3	76151.3	3606.02	492.209	25.1119	3249.44	3503.05	2515.39	1055.85	263.859	275.477	2714.19	906.994	15875.4	171927	47210.3	70098.2	83.8111	317858	4089.56	40.3814	125312	72.0635	162.232	32647.6	78.2066	25489.9	399621	97513.6	88416.9	60.8815	55167	44170.5	55727.8	85482.9	162588	167733	1736	22977	7.64494	174.506	462497	30789	8035.18	36.845
MYS	2.06881e+06	1.85883e+06	375498	1214.13	213141	5.50397e+06	10385.4	7387.02	12554.6	8853.96	19034	12113.8	6163.18	17078.1	18659.6	11134.8	9767.82	1.40317e+06	1.59125e+07	24262.8	1.728e+06	9316.07	1.84633e+07	425012	28905.3	1.15843e+07	712449	1.01558e+06	4.5389e+06	1.3583e+06	996270	1.72096e+07	2.72457e+06	2.48695e+06	1565.53	2.0583e+06	1.39236e+07	3.45696e+06	1.70116e+06	1.57287e+06	2.5165e+06	290039	759919	48394.6	10461.2	2.35536e+07	85536.9	59893.3	47419.6
NAM	10003.1	27759.3	407383	94.1468	11522.4	119000	1039.05	602.043	53.2104	2617.45	1502.32	730.425	96.7097	173.241	776.101	103.553	167.047	32660.4	388218	2997.3	80686.1	5072.47	461966	29392.1	172.002	132290	71028.1	51966.3	68207	1938.39	19325.6	510346	144771	137065	187.117	417424	766530	20032.4	58395.2	3343.48	13191.3	44118.2	121905	221768	1604.77	2.2119e+06	4099.33	80884.1	82324.7
NER	25474.9	31735.9	1760.31	4516.3	6192.24	36392	1758.86	247.924	25.0868	266.603	2331.77	324.326	57.3481	158.819	1731.14	3607.11	96.4133	42554.4	334190	137.234	347149	204.73	885694	323.71	4672.57	120364	5259.97	4112.8	189698	13525.9	120629	158000	81551.7	47845.4	467464	149982	235834	12974.7	10584.8	2059.81	205.513	527.617	193169	136157	5469.41	1.31447e+06	29494	2.39184e+06	6355.65
NGA	4.66229e+06	3.61715e+06	417192	123940	84400.2	1.76786e+06	396441	56918.8	4588.92	27538	856908	29099.7	13210.5	35668.9	173714	41284.3	23512.7	508503	1.71463e+07	790624	3.97732e+06	21139.5	2.70127e+07	129389	20067.1	7.86271e+06	133746	436777	168453	83623.5	1.08177e+06	1.21516e+07	2.78193e+06	7.04161e+06	9044.23	2.03041e+07	3.18863e+06	412068	1.30628e+07	49796.5	374612	441128	7.23534e+06	9.95603	310099	2.18566e+07	248678	1.70846e+07	4.33752e+07
NIC	55244.5	30551.5	109196	19.4541	24811.4	292947	3235.67	1096.65	41.4683	233.685	3080.04	1622.26	128.852	405.651	3268.5	970.805	64.4081	36351.4	566424	269.391	107816	108.969	952756	679.276	11543.7	320203	143.278	60952.6	239852	127769	138071	822785	268382	182139	70.5033	13329.5	46135.8	44169.5	9400.25	56319.6	121.61	4315.79	39069.4	11.9681	165.553	1.08218e+06	18051	38502.9	30084.8
NLD	1.5194e+07	3.12976e+06	6.4401e+06	2933.2	219969	1.11073e+07	56877.8	12522.4	22910.9	38672.7	148947	9639.61	13247.9	69305.5	41705.5	89965.5	24506.2	2.63545e+06	2.83516e+07	181415	3.29823e+06	97124.4	3.97354e+07	218544	343651	1.54789e+07	2809.78	50973.3	9.33138e+06	1.40345e+06	2.98283e+06	4.12011e+07	4.77927e+06	3.76249e+06	8489.92	3.87532e+06	2.60917e+07	799658	113712	31732.6	244978	27649.1	1.06236e+07	10094.3	24646.8	7.81492e+07	76857.3	26425.7	41473.1
NOR	5.66184e+06	2.48308e+06	2.9214e+06	470.63	301236	7.45274e+06	16206.3	146123	8711.02	45672.4	96298.9	11311.8	21856.9	31332	35562.6	115171	7210.38	667583	1.90366e+07	37568.8	694089	123801	2.66026e+07	19209.4	1.35748e+06	3.998e+06	353.786	244558	3.8782e+06	159893	728267	2.3149e+07	2.24254e+06	1.97488e+06	4869.78	1.83836e+06	9.64396e+06	939097	186111	1.4097e+06	55471	71737.9	3.74431e+06	8864.85	87.4122	3.30078e+07	66970	12449	102.704
NPL	100198	85766.8	238146	148.223	40384.9	467695	10348.1	9688.85	82868.3	3687.76	396204	15298.8	1682.95	7469.12	3407.43	10593.2	719.64	65328.1	2.50067e+06	545916	489351	213.881	3.19417e+06	233976	27879.1	1.68182e+06	647.672	5149.07	565572	170791	186620	1.83092e+06	83282.8	869714	194.46	1.89824e+06	672564	21417.3	328664	112075	121787	25726.4	118873	12.6141	402.941	1.76138e+06	61081.9	914873	74608.4
NZL	1.53313e+06	3.72851e+06	2.03723e+06	174.818	81616.4	3.89228e+06	7471.27	3330.43	47435.7	6351.94	76327.9	6184.64	6599.49	28061.7	7263.96	4143.84	7680.09	185683	1.23337e+07	21902.3	851965	76206.4	1.3169e+07	11314.7	118154	3.04077e+06	189.384	505920	1.305e+06	321297	719928	9.98727e+06	2.38673e+06	1.10094e+06	424.333	720898	6.66795e+06	393317	278794	59961.9	1475.45	242781	1.44673e+06	11265.3	107.497	1.1321e+07	3826.24	1089.79	11081
OMN	15705.3	321401	376812	5359.76	26776.5	665308	4642.2	23863.6	6320.27	1634.38	95486	10224.7	5361.3	5984.08	4190.17	33.0952	2239.98	179422	9.08583e+06	59906.2	212495	4377.23	1.11388e+07	1967.51	15401.8	731987	53663.5	16119.7	1.16599e+06	81912.6	8725.83	4.04723e+06	21813.9	419714	8136.42	237362	3.51744e+06	163576	40791.4	114470	6918.23	21037.2	294677	2793.58	9369.52	1.48327e+07	15174.6	8243.68	1920.34
PAK	108419	839922	481.155	843.821	291533	2.10622e+06	338173	7418.97	4923.96	2110.84	399871	9750.73	12419.3	44474.3	26557.3	218837	20244.6	2.65847e+06	439907	3.24918e+06	2.21315e+06	4000.9	533606	66910.8	366651	3.91394e+06	365.949	85862.5	2.46157e+07	1.28063e+06	2.63573e+06	1.2926e+07	6.3241e+06	2.8153e+06	304.789	2.47707e+06	845135	103214	545071	343943	144108	404322	505697	13963.3	133.288	2.0157e+07	1.30743e+06	6.16462e+06	992964
PAN	28020.9	409431	868120	65.4478	75533.1	424941	6106.31	2842.65	1903.06	358.332	4153.8	5243.92	471.056	2100.4	2564.5	12014.6	1971.11	244792	7.23498e+06	279102	111974	36.315	7.31887e+06	3717.83	213.055	614120	579.173	1526.19	821703	3351.5	1962.31	2.88206e+06	6925.15	211267	231.795	24182.8	3.7181e+06	79626	51.4056	183709	4774.95	12698.4	284137	10.8725	210.492	3.27797e+06	162.206	174.838	656.538
PER	1.74978e+06	1.37558e+06	2.15313e+06	6879.76	53700.5	1.84834e+06	129315	52283.4	54182.5	46241.2	152647	52789.1	120673	125124	38142.3	93774.7	94867.5	409108	1.03768e+07	400703	1.01963e+06	61353.8	1.6775e+07	397637	593085	2.60747e+06	2920.4	4359.98	3.00024e+06	631334	1.87732e+06	1.24236e+07	1.26643e+06	1.1803e+06	241.144	1.78146e+06	9.00554e+06	411202	688030	161879	155047	1.09076e+06	3.87874e+06	22026.6	1098.17	1.41789e+07	849553	198832	23019.9
PHL	1.8282e+06	4.3361e+06	1.12482e+07	81.8573	1.78138e+06	9.26789e+06	210712	43437.9	16772.2	180002	300041	41404.3	31942	676960	113095	529217	33915.9	2.07313e+06	1.66692e+07	285897	2.26881e+06	45680.9	2.29079e+07	52748.4	757789	1.2989e+07	1771.74	341899	1.5627e+06	1.8144e+06	3.50853e+06	1.75982e+07	5.78578e+06	3.63256e+06	283.908	604131	3.3478e+07	7.04587e+06	4.32328e+06	23098.7	37496.2	142792	2.35098e+06	195.707	114.737	1.78317e+07	174734	6938.98	145117
PNG	219824	257085	61314.6	11.2849	38453	567408	832.358	1401.49	452.932	54.4699	10938.6	602.886	99.9031	881.878	3847.99	286.693	3089.16	6804.05	419396	33306.1	72349.4	8878.97	1.03415e+06	3006.96	2091.85	62912.8	59.6162	28019.6	13228.2	6894.41	58052	1.94906e+06	1022.78	53087.9	34.0755	40340.1	82078	42669.8	89728.3	347.951	2.84739e+06	32125.8	26002.7	90.6325	30.1704	2.80222e+06	67454.7	23833.4	94135.6
POL	8.62321e+06	966402	1.11928e+07	4905.6	376115	6.1945e+06	92034.5	27719.5	64813.6	31766.4	216815	35020.4	37559.1	152568	23747.7	165149	17808.7	290148	2.43276e+07	1.05777e+06	2.19235e+06	186734	3.12463e+07	655854	311823	8.28257e+06	1640.59	6450.17	1.01941e+07	7.40996e+06	3.46987e+06	2.89199e+07	477517	6.02548e+06	6280.05	6.42836e+06	2.07926e+07	1.01628e+06	123907	22447.3	225397	39086.6	9.75544e+06	5267.55	6796.13	3.32287e+07	226429	221296	40212
PRK	51929.9	48129.1	360907	4182.1	39885.3	29172	286265	250359	347355	188583	1.23342e+06	244639	104891	166960	591002	795973	47168.5	19914.1	448.051	35413.7	65899.5	527.954	741.222	19545.8	254595	207848	17193.3	184747	357296	5694.23	11874	59193.1	2713.49	3404.05	15033.2	1736.97	62830.7	460509	108145	84811.6	192223	54545.8	3801.57	149688	46858.5	38226.8	43999.1	217834	62038.9
PRT	1.62679e+06	931656	6.02974e+06	962.023	365449	2.5835e+06	23235.1	4283.44	5158.71	9455.68	51788.6	3244.36	4985.6	10308.7	10903.9	11778	1718.97	951880	6.98967e+06	116216	442783	11106.6	8.16731e+06	56939.9	109502	2.34089e+06	1316.79	107460	2.09958e+06	3.97526e+06	795625	1.26822e+07	515206	1.39787e+06	3830.56	1.14684e+06	6.54856e+06	1.59774e+06	454311	18659.7	26220.1	27588.7	2.67226e+06	7761.75	142.127	1.57097e+07	83564.3	13708.2	7428.3
PRY	137753	144531	825167	37.7867	57938.7	1.16008e+06	24255.5	3634.54	37.1603	105159	104243	239.27	403.327	342.087	38869	522.125	348.304	256720	1.90609e+06	7357.99	149464	394.742	2.49876e+06	476.057	49.8068	2.21551e+06	295.54	113.065	196066	477.55	299301	689023	2436.66	346699	164.381	351645	1.54734e+06	69536.3	23117.2	447435	87735.9	252.654	263484	8.6817	176.433	2.59199e+06	1083.62	361.369	8.62924
PSE	15250.4	82637.3	291608	71.2164	20283.9	223806	9106.06	38970.3	294.938	1443.4	34997.8	1100.39	1014.06	7028.59	1877.38	191.603	112.494	91721.4	1.02032e+06	39489.3	92652.5	107.82	1.28647e+06	8720.88	85885.9	813313	906.44	14826.9	209440	9292.83	27024.3	767314	11300.5	178305	1185.95	376228	752299	61999	18586.9	28703	83623.4	62719	149601	1215.96	602.911	2.03953e+06	54929.6	18736.5	35051.5
QAT	6273.11	213153	1.091e+06	21.716	191029	938460	6449.97	163101	159037	357.441	2.04536e+06	10948	13598.5	172395	746.566	84.7373	5246.74	412328	1.81812e+07	58539.2	609863	50.781	2.11822e+07	22060.1	48747.5	6.04191e+06	178.93	4875.58	1.17192e+06	1311.96	3132.05	7.46126e+06	8530.41	3.69324e+06	202.027	1.20162e+06	8.67895e+06	315075	6788.56	96193.2	17735.9	118491	2.93424e+06	32.576	15.064	1.81123e+07	2543.22	603.154	5619.3
ROU	2.96406e+06	674981	4.23446e+06	473.641	208494	4.97431e+06	25195.6	12402.5	34997.1	29613.2	26677.5	11013.8	9890.15	24550.5	3447.08	40046.5	7951.5	495315	1.40775e+07	106770	1.12027e+06	41778.2	1.87511e+07	45278.2	14266	3.07506e+06	1361.24	348.327	3.73965e+06	2.4361e+06	861713	9.82494e+06	2.46682e+06	1.72675e+06	255.115	1.28647e+06	1.89931e+06	323309	56863.6	164060	217566	43072.7	2.78312e+06	7311.44	63.7775	1.35597e+07	468052	119726	24367.4
RUS	2.58973e+06	1.12018e+07	1.14712e+07	1960.27	1.79235e+06	2.40818e+07	154217	2.40208e+06	650872	78568.1	3.06218e+06	786098	140429	948875	94861.7	963132	67896.9	6.87418e+06	7.48176e+07	257711	5.79092e+06	16785.1	8.81826e+07	131051	2.83888e+06	2.34754e+07	3008.5	149778	2.09094e+07	8.4997e+06	4.41473e+06	6.73892e+07	1.57248e+07	6.81434e+06	2155.07	1.07648e+07	4.44589e+07	2.67779e+06	4.8308e+06	903312	2.26987e+07	65063.2	1.69617e+07	38273.7	3715.4	1.48398e+08	695071	393513	8357.17
RWA	11328.8	46161.9	213506	49.1757	2120.53	116370	5807.41	1384.52	523.754	537.876	7004.26	973.861	137.268	210.063	37337.9	900.247	1862.38	17057.2	708207	17628.9	45470.2	12.6812	1.31769e+06	41099.1	55.7851	109394	495.116	682.023	40463.6	664.793	271231	516062	33655.2	54388.6	148.272	57065.9	116509	67685	36781.4	2820.65	15036	249630	38620.5	5.34271	152.993	883743	3322.46	199768	36561.1
SAU	1.84252e+07	1.84003e+07	4.21081e+06	1054.03	144486	6.95293e+06	6403.09	24032.2	8229.11	871808	164631	13893.1	9420.52	18510.6	7646.84	1.78018e+06	4863.38	1.66068e+06	3.86059e+07	1.98967e+06	5.13722e+06	6817.53	4.99956e+07	1.226e+06	75627	1.24229e+07	188.727	282514	9.16414e+06	2.48025e+06	3.00569e+06	5.82013e+07	1.18117e+07	1.18992e+07	829.269	1.14115e+07	2.67594e+07	863579	101941	7.34549e+06	85553.6	233926	5.9268e+06	854.284	158.197	7.70011e+07	170858	432228	14226.2
SDN	4904.64	76060.5	650496	282.519	87509.3	97879.3	29149	13396.6	25.3502	442.288	25770.2	1973.31	7549.06	62683.8	467.277	394.38	5788.41	115711	1.5989e+06	13476.4	260441	228.877	1.62735e+06	7302.57	19402.2	73866.9	423.531	18404	625224	15993.9	28998.6	1.51779e+06	31874.3	65076.2	97.17	183112	4.9202e+06	84363.7	21197.5	66324.6	182105	2878.05	53612.5	197.878	184.222	2.02561e+06	269342	663351	159543
SDS	73380.6	49631.9	27498.2	16131.6	147707	88759	4.0159	4.13964	177.818	9.94893	11.1873	16.0931	4.3789	90.9659	14.9022	3.72001	6.23747	6211.86	117178	3332.37	7400.17	101526	180767	110217	212.096	3038.53	16148.2	1198.9	16250.5	84043.1	1531.19	86700.1	142019	23380.3	17963.8	3657.46	81336.1	46117.5	1439.04	635.936	3983.83	5047.59	17414.8	4886.68	17295.7	125945	5463.93	6761.85	5146.84
SEN	86179.8	260388	107774	48.5176	44977	127656	14416.5	6315.13	110.666	9824.28	23215.5	1915.93	397.688	2678.16	711.932	2504.27	460.743	155006	2.07026e+06	224686	659837	2664.97	2.40086e+06	9955.08	53081.6	423231	453.717	29663.4	382203	93832.3	300825	498771	147501	245141	847.95	12758.9	66976.3	233108	316071	46023.5	40971.9	2565.77	67828.3	9.03445	143.04	2.29638e+06	202292	606190	196465
SGP	1.56545e+06	5.74039e+06	1.29001e+06	155.29	79499.2	4.86641e+06	28767.3	41553.1	82147.4	9025.93	75636.2	78113.9	42374.4	68063.5	28565.7	50118.3	7436.21	284546	2.36973e+07	25785.5	442922	11335.1	7.57915e+06	15586	54710	7.70959e+06	1406.44	46183.3	846984	188918	333060	1.23738e+07	622149	1.35855e+06	3980.99	449849	1.91364e+07	210658	123344	101737	96060	243134	5.10545e+06	10073	1654.38	3.06068e+07	68491	2458.36	4197.43
SLE	11083.2	20845.7	11686.7	10.422	530.943	41044.9	1947.78	1601.17	30.0915	2052.59	7117.98	1180.29	171.075	84.215	1416.84	1087.51	270.711	4955.74	17901.9	41998	66221.9	416.365	26362.2	5824.56	2188.72	74879.5	45.1072	95781.5	4533.89	1806.52	71732.7	205230	23135.2	39603.4	25.3103	67662.7	47760.2	22120.1	113786	11005.1	943.911	11194.1	18628.1	27.9047	33.4286	248983	152320	93.2684	446299
SLV	39755.7	10019.9	392137	17.0217	105338	93946.4	1646.33	877.001	713.917	995.471	2020.26	1107.07	622.559	1743.53	2856.86	171.927	236.859	153256	708543	169636	284339	2126.68	1.08486e+06	195343	319.013	35872.3	59.7343	24414.3	699298	134761	606868	656933	584699	653300	49.12	1690.18	13162.8	85772.7	60296.3	46525.7	92517.6	246837	6794.85	8.23095	215.381	2.90743e+06	515396	835.943	57176
SOM	5264.03	14524.7	110927	19.6918	9891.32	76964.2	4100.43	1195.31	2104.18	2745.58	107927	6948.95	77.4951	508.099	33247	3.65848	1365.13	72081.4	77699.6	1381.33	55126.5	10.0677	150876	1303.96	125.442	98841.9	40.5033	2762.43	123332	315.808	45700.2	215002	422.426	106237	109.536	21758.1	430997	18032.3	1876.49	57242.8	2.96048e+06	120286	10285.3	18.4141	168.867	293926	250.634	1849.45	756.925
SRB	1.18279e+06	499119	1.08706e+06	23.9175	19608.2	1.41897e+06	1116.39	1206.03	297.452	878.185	2628.08	1534	861.507	6175.42	3311.13	1820.2	1414.98	242840	4.30488e+06	1008.75	171141	93.4601	4.90771e+06	634.867	16470.3	280281	514.747	4025.71	356742	67099.8	395949	5.32904e+06	830840	1.03405e+06	108.783	68679.8	651130	18047.7	179179	905.255	1346.02	272563	299562	3.4675	101.543	5.7062e+06	585550	93105	7519.48
SVK	1.60481e+06	354764	1.97877e+06	515.315	239581	1.74133e+06	11535.4	6058.15	6745.53	3024.84	45099.3	5724.45	5923.55	12355.4	12738.9	6864.27	2347.61	152518	3.54117e+06	102114	333553	9407.21	4.48637e+06	110446	34945.1	2.0431e+06	417.138	812.889	1.01296e+06	2.8786e+06	1.40806e+06	4.36727e+06	162415	1.04004e+06	1257.76	856351	3.04828e+06	232145	6912.71	32334.6	24693	7531.15	1.40892e+06	6491.95	1157.79	7.95656e+06	10300.4	57441.9	3137.33
SVN	597330	150785	533884	221.087	28742.9	889893	8050.42	5797.75	6498.23	5285.92	15205.4	3253.06	2668.95	15816.4	27763.2	7635.2	1431.83	139790	1.61488e+06	11920.7	210245	1734.47	2.08955e+06	14353.8	32744.4	681061	165.54	2453.23	518661	134989	339751	2.86063e+06	447495	826313	2672.39	545037	1.44308e+06	109060	16268.5	284947	71800.8	83596.1	662602	222.261	69.4296	3.22679e+06	27555.5	10871.9	3590.67
SWE	4.68757e+06	1.94472e+06	5.94844e+06	585.508	181962	8.54859e+06	74694.2	27824.7	34674.2	26208.7	281510	43735.5	23022.2	48257.9	21527.6	22710.3	17801.8	929912	1.86674e+07	312373	915016	10254.1	2.4808e+07	108289	109464	5.6181e+06	8734.42	11847.5	4.53298e+06	675180	1.52152e+06	3.20331e+07	5.47515e+06	3.78063e+06	9818.93	4.79261e+06	1.2125e+07	696948	350153	26118.2	1.30849e+06	56912.5	6.10967e+06	85541.8	863.018	2.60429e+07	111906	76846.1	5773.96
SYR	4648.79	77850.3	19784	45.4068	25725	360841	2354.82	1156.65	165.582	2237.04	4365.79	785.773	391.369	1876.88	8215.2	254.183	136.51	66913	855916	146.336	155936	4354.06	1.01517e+06	874.166	570221	86148.1	393.468	1315.96	395310	1611.67	920.09	713917	5263.68	1.99349e+06	250.363	17065.7	340285	9965.03	84780.7	22428.3	2577.86	1429.62	60431.8	9.70099	160.897	2.85773e+06	26995.7	555.33	49.6421
TCD	70583.2	46857.7	38875.8	35.1808	14850.3	63944.4	1349.25	467.945	29.1339	717.439	1731.96	12797.2	124.837	1113.04	4144.81	1152.5	830.987	292493	296302	102463	534890	1825.88	551707	5203.36	1172.1	240206	71.5231	1270.04	68346.7	243.366	367231	273911	3215.86	257305	55.4013	113990	20822.1	69153.6	109773	33894.6	748.874	25523.5	73929.9	7.80247	169.996	847247	160550	275.369	565589
TGO	8524.82	6764.65	27750.5	46.5022	1364.11	39295.8	722.473	484.211	20.2454	230.409	758.259	494.954	43.4128	125.806	147.646	825.442	181.666	5939.16	134072	269476	40535	11.4025	66638.1	2161.87	72.81	31992.9	127.91	7.36372	11365.6	1118.97	127025	277183	47497.7	67491.7	88.613	3622	22914.9	32548.3	45261.5	1021.87	5238.18	26330.9	4428.77	8.24316	140.593	509160	17501.9	2145.27	96136.3
THA	3.04857e+06	3.7097e+06	1.39106e+07	1432.72	100654	2.45622e+06	21707.9	22528.5	16585.7	47263.3	117595	13004.9	9511.09	39956.3	32404.6	9625.48	9144.63	637362	2.12249e+07	507247	582177	5283.85	2.25658e+07	365210	582019	2.94291e+07	1210.16	462693	2.10001e+06	1.73309e+06	1.8876e+06	3.45144e+07	4.47524e+06	6.56187e+06	77.8287	4.73661e+06	2.33321e+07	2.53621e+06	2.45393e+06	311110	229179	2.25859e+06	9.31786e+06	4713.05	583.886	4.53091e+07	49062.9	28589.3	582191
TJK	21856.1	61121.9	35611.9	9953.32	32345.4	66579.5	390.333	8416.6	92510.2	1008.86	17269.6	718.574	1588.4	106101	1638.22	799.699	19200.9	117156	693715	32153.6	168071	131.23	780281	19274.7	3253.3	145583	5282.76	263169	325297	3453.33	54330	289560	89472.8	150033	181.22	37349.6	141061	537.568	4042.78	16864.3	269848	5458.63	35078.3	9.34299	3405.03	476663	38521	273880	9.49588
TKM	4444.9	94884.8	310927	5.1182	74776.3	74640.3	9326.95	1369.79	6865.83	320.715	4560.49	1592.39	402.241	10051.1	2369.09	283.747	1095.72	443263	1.75213e+06	823.276	249695	75.6653	2.80826e+06	325.259	116.595	155504	14.6717	17.7319	669135	38.0817	151.853	1.32248e+06	54.6485	145679	18.3367	27747.4	280845	35221.6	5880.06	18702.7	1236.4	49.9411	15498.3	12.648	12.3666	1.55275e+06	1771.32	759.448	81.8668
TUN	656689	278335	233290	269.255	13677.8	191513	11093.9	9606.96	2457	385.444	21870.3	4483.35	17761.3	30721.6	423.019	579.934	3618.18	135569	2.22077e+06	54726.9	425866	39335.9	2.96037e+06	47637.3	116117	934375	533.868	104226	416849	86212.3	219000	128752	113920	197417	208.885	598783	1.07953e+06	42057.3	161139	6348.05	10773.3	338.281	333418	4754.7	146.382	7.44372e+06	21802.4	13684.4	484.143
TUR	8.81744e+06	1.49591e+06	3.3838e+06	1833.75	105198	7.10577e+06	50465	39834.2	49943.7	43315.2	63917.8	29794.5	34014.8	352687	23386	461092	40582.1	3.47628e+06	4.04966e+07	167867	7.82609e+06	1.09994e+06	5.50748e+07	62396.4	109147	7.8059e+06	3593.96	87509.7	1.68319e+07	7.60534e+06	2.63918e+06	3.67757e+07	3.4605e+06	7.35189e+06	43049.9	7.48036e+06	1.25568e+07	441719	994337	277869	152546	71263.9	1.56379e+07	44199.6	2416.03	4.6806e+07	863639	206777	41848.8
TZA	1.6701e+06	45261.4	794990	1290.34	49428.2	225795	25045.1	112174	16817.2	8379.9	240571	3775.78	409.049	4371.36	440.339	3558.06	691.376	218136	7.89871e+06	253388	214466	24311.6	8.80415e+06	16521.2	2913.04	910687	24281.9	19257.2	390667	3885.88	233719	2.53287e+06	104481	705871	6950.62	453578	288916	110046	347848	435.47	1.73891e+06	63264.8	1.23909e+06	57987	4446.09	2.57765e+06	218610	5.80517e+06	97999.4
UGA	21745.3	10476.2	1.73689e+06	9.82348	49991.9	203602	2685.43	1752.66	104.884	621.135	2937.41	757.263	607.621	1744.64	860.171	10446.4	1020.13	212002	1.00308e+06	43789.8	70574.8	13966.2	1.84423e+06	61889.7	8656.69	456012	41.9544	238324	537570	114.555	344897	2.9033e+06	213163	807469	74.5893	289308	43811.4	182063	538882	37905.7	1.44525e+06	302.328	111614	9.29485	145.081	1.88245e+06	47668	559756	234.205
UKR	2.95866e+06	249268	4.52909e+06	1530.52	863986	1.71597e+06	33142.1	16795.8	4764.12	2788.67	48210.4	2297.91	32258.7	8722.77	3550.64	53426.6	1215.84	1.23246e+06	3.84499e+06	5259.77	1.72269e+06	1193.44	5.21067e+06	5711.54	5536.38	1.80696e+06	1025.68	5532.69	5.32557e+06	1.75693e+06	322795	1.10194e+07	696464	1.6414e+06	358.184	1.71446e+06	325481	737386	863138	81324.6	5032.65	512.228	750367	50833.8	18674.8	9.98694e+06	812570	3.39546e+06	851.566
URY	103930	232731	1.06862e+06	12882.8	29796.6	219625	7768.91	4094.51	66.0587	6438.28	27181.8	879.859	467.068	6857.58	569.557	376.687	589.071	659539	3.63393e+06	922.153	162771	9468.45	1.68646e+06	865.322	114.218	1.10035e+06	12514.6	303.885	703085	26011.8	18479	3.50247e+06	20174	236681	2264.46	272090	4.36793e+06	57004.8	4276.94	59289	27018.4	857.827	178144	96.9469	42106.9	5.57031e+06	9410.55	1528.05	10232.3
USA	1.54201e+08	1.2703e+08	1.39612e+08	1.30732e+06	4.01061e+06	2.7563e+08	1.86513e+06	1.38451e+06	2.39764e+06	1.83691e+06	1.90036e+06	1.1483e+06	1.06902e+06	1.65049e+06	2.39518e+06	1.71029e+06	681412	6.06268e+07	8.41966e+08	1.4269e+06	1.71105e+07	178044	5.68136e+08	1.53676e+06	1.44064e+06	3.7863e+08	672.825	380107	1.40209e+08	5.37596e+06	1.07411e+08	1.34394e+09	1.41722e+08	8.63643e+07	8015.2	7.44565e+07	1.25698e+09	1.33744e+07	2.78266e+06	5.17344e+06	338467	2.00151e+07	2.56063e+08	19440.6	922791	2.58165e+09	1.02627e+06	112516	259465
UZB	311636	186103	247173	44.2178	36862.7	555032	114740	2857.08	293.688	10735.3	54623.2	2150.14	3958.67	308556	14416.7	511.653	471.092	541374	3.17234e+06	95319.5	526132	109.785	4.46495e+06	2368.46	72977.7	1.047e+06	801.546	1.05885e+07	1.01552e+06	3712.19	47100	4.59542e+06	12877.2	1.47386e+06	219.226	1.50983e+06	950678	12886.9	165177	8652.34	260782	4015.92	330646	12.4782	149.565	4.21302e+06	15657.4	5494.64	10.7158
VEN	577366	823182	1.19832e+06	11928.5	145773	648654	4763.81	8834.59	10572.1	522242	31304	1531.92	1351.25	16655.1	425931	101.43	741.111	1.05344e+06	8.11058e+06	1108.04	421667	7908.77	3.83487e+06	583.284	29157.6	1.70048e+06	21654.4	23147.6	3.72953e+06	8214.15	128964	4.03304e+06	24537.2	861257	9282.38	249904	3.72957e+06	274840	13728	380575	16756	183821	475539	55064	7471.6	3.50935e+06	86106.5	29155.1	47750.4
VNM	1.34113e+06	1.68604e+06	1.45304e+06	25302.5	105300	4.59591e+06	86859.9	11474.5	47293.6	79992.4	212982	17443.2	28338.3	12120.1	12919.5	19220.6	20377.3	1.1233e+06	1.6154e+07	18877.7	164714	32695.2	4.32771e+07	1471.39	7503.66	2.00957e+06	529003	1.00189e+06	602267	1.02438e+06	1.30719e+06	1.8418e+07	1.81993e+06	4.85181e+06	9311.39	1.02746e+06	7.34114e+06	4.39095e+06	5.42791e+06	231424	647748	34250.1	5.70465e+06	45261.6	66459.9	1.28178e+07	684703	18781.3	5351.38
XAF	219229	342523	173106	6.84381	784.43	393566	2228.2	691.619	2292.37	1659.52	4186.52	1086.6	757.336	1093.28	302.434	1324.6	817.594	79806.5	1.02007e+06	9478.69	58696.4	338.906	1.16235e+06	1757.05	188.77	432665	39.9255	3590.83	198320	145382	432961	2.87184e+06	182389	290762	187.121	196548	526925	73419.8	297729	29313.2	347641	63164.7	426246	8.61945	139.332	1.62741e+06	21856.3	43292.4	31130.4
XAM	115081	234739	947496	256.824	72955.6	780139	65845.7	93756.5	21685.5	23336.8	457056	25518.9	9041.76	6563.38	1990.86	456.337	1875.16	259969	5.56947e+06	7885.02	313336	2208.35	5.31819e+06	8982.39	2106.02	2.11495e+06	151.413	15330.8	797640	56408	36605.6	7.70695e+06	126823	763044	5287.85	248504	1.76779e+07	216739	12772.5	78966	423668	114830	1.29772e+06	20.0392	184.565	6.01165e+06	4506.55	951.051	20149.7
XAS	989818	1.00173e+07	38023	27.1074	369.122	7.17608e+06	18316.2	81395.4	19950.4	1369.67	1747.23	2522.79	12323.6	37801.4	1602.3	21446.8	3574.1	3178	3.18405e+07	109.763	3410.57	286.454	3.16763e+07	315.733	2061.09	1.0447e+08	18049.5	1.22616e+06	32842	3.48569e+06	2.62722e+06	6.17818e+07	8.08717e+06	9.26597e+06	179.517	2.27523e+06	1.35378e+07	164340	5.26752e+06	5374.94	6.54347e+06	672667	2.82181e+06	7.62134	17430.1	8.25638e+07	2.20104e+06	210912	261765
XEU	52163.3	993849	105689	321.659	9879.84	237533	2156.9	1251.4	801.683	7406.93	3033.38	1000.31	246.797	2888.74	212.86	194.925	195.766	26946.2	1.3362e+06	58.2849	30089.1	250.658	1.31695e+06	68.455	7213.14	294410	665.977	257905	103454	2325.06	1039.14	1.76845e+06	5784.79	328433	279.365	1919.69	2.97522e+06	17148.5	20737.4	10310.9	13206.3	33460.1	12177.6	2097.76	223.451	2.42632e+06	376.854	387.471	10347.1
YEM	87891.1	80619.2	11977.2	53.9511	31537.3	49123.5	17102.3	4625.42	376.823	605.306	14321.2	4909.76	1132.93	10124.6	1285.48	1006.68	1762.53	161318	658525	4560.6	553400	1244.45	867736	4033.26	260.926	162360	85.4421	42322.5	267241	121523	100997	579675	93566.3	114231	79.2591	143475	192092	15451.1	95560.9	12366.7	20299.5	331.692	114493	11.2673	138.833	1.25795e+06	189594	533670	15948.1
ZAF	2.75786e+06	2.11606e+06	5.88445e+06	89.3788	103132	699015	12256.8	7497.39	16810.4	16350	35665	10234.8	8296.97	71280.3	29172.3	29387.3	42888.1	4.23149e+06	1.26786e+07	13243.5	2.39666e+06	316893	1.50213e+07	14087.6	365951	3.61587e+06	688.359	19720.5	2.55048e+06	115380	3.60558e+06	6.1398e+06	5.53046e+06	2.83907e+06	187.358	1.09177e+06	2.26889e+07	125228	79388.4	470081	27261.7	7021.35	3.27743e+06	3525.21	566.274	7.07379e+07	82269.5	536663	15178.5
ZMB	9765.89	87121.4	405660	34.5742	32125.2	201777	3236.38	1501.07	34.3686	8791.74	7479.02	575.514	279.875	896.413	2359.22	99432.9	622.01	252749	1.90967e+06	1008.47	49109	538.594	2.81047e+06	1515.2	267090	209317	291.865	6539.44	103720	5830.89	221295	960728	181125	703472	156.183	184363	120286	60574.3	96728.4	6762.83	285.567	641.001	18653.4	40.1261	135.856	2.15111e+06	30696.9	100626	538.478
ZWE	11327.7	80948.4	1.26508e+06	2963.84	29357.8	224315	2628.19	4119.28	788.227	15354.3	6818.99	1011.44	297.639	895.408	48540.7	333.427	1475.77	300525	239128	14463.6	111885	1668.82	526227	8031.39	3309.63	231406	1086.52	81520.2	216289	3846.9	112861	954041	285511	642142	2216.75	263134	1.16238e+06	51021	36411	27733	10151.4	1815.62	47825.3	86.8734	262.871	738209	13816.3	2316.03	549.596
[truncated: 80 more columns]

## Sheet: Population
ISO_Code	Population (2019)
ABW	106310
AFG	38041757
AGO	3.18253e+07
ALB	2.88091e+06
AND	77146
ARE	9770526
ARG	44780675
ARM	2.95773e+06
ATG	97115
AUS	25203200
AUT	8955108
AZE	10047719
BDI	1.15306e+07
BEL	11539326
BEN	1.18012e+07
BFA	2.03214e+07
BGD	163046173
BGR	7000117
BHR	1641164
BHS	389486
BIH	3300998
BLR	9.45241e+06
BLZ	390351
BMU	62508
BOL	1.15131e+07
BRA	2.1105e+08
BRB	287021
BRN	433296
BTN	763094
BWA	2303703
CAF	4745179
CAN	3.7411e+07
CHE	8.59136e+06
CHL	18952035
CHN	1433783692
CIV	25716554
CMR	25876387
COD	8.67906e+07
COG	5.3805e+06
COL	50339443
CPV	549936
CRI	5047561
CUB	1.13335e+07
CYM	64947
CYP	1.19857e+06
CZE	10689213
DEU	8.3517e+07
DJI	973557
DNK	5771877
DOM	10738957
DZA	43053054
ECU	17373657
EGY	100388076
ERI	3497117
ESP	46736782
EST	1325649
ETH	112078727
FIN	5.53216e+06
FJI	889955
FRA	65129731
GAB	2172578
GBR	67530161
GEO	3.99676e+06
GHA	30417858
GIN	1.27712e+07
GMB	2347696
GRC	10473452
GRL	56660
GTM	1.75815e+07
GUY	782775
HKG	7436157
HND	9.74612e+06
HRV	4130299
HTI	1.12631e+07
HUN	9684680
IDN	270625567
IND	1.36642e+09
IRL	4882498
IRN	82913893
IRQ	39309789
ISL	339037
ISR	8519373
ITA	60550092
JAM	2948277
JOR	10101697
JPN	126860299
KAZ	18551428
KEN	52573967
KGZ	6415851
KHM	1.64865e+07
KOR	51225321
KWT	4207077
LAO	7.16946e+06
LBN	6855709
LBR	4937374
LBY	6.77745e+06
LIE	38020
LKA	21323734
LSO	2125267
LTU	2759631
LUX	615730
LVA	1906740
MAC	640446
MAR	3.64718e+07
MCO	38967
MDA	4.04326e+06
MDG	26969306
MDV	530957
MEX	127575529
MKD	2083458
MLI	19658023
MLT	440377
MMR	54045422
MNE	627988
MNG	3225166
MOZ	3.0366e+07
MRT	4.5257e+06
MUS	1269670
MWI	1.86287e+07
MYS	31949789
NAM	2494524
NCL	282757
NER	23310719
NGA	200963603
NIC	6.5455e+06
NLD	17097123
NOR	5378859
NPL	2.86087e+07
NZL	4783062
OMN	4974992
PAK	2.16565e+08
PAN	4246440
PER	32510462
PHL	1.08117e+08
PNG	8776119
POL	37887771
PRK	25666158
PRT	10226178
PRY	7044639
PSE	4.98142e+06
PYF	279285
QAT	2832071
ROU	19364558
RUS	145872260
RWA	1.26269e+07
SAU	34268529
SEN	1.62964e+07
SGP	5804343
SLE	7813207
SLV	6453550
SMR	33864
SOM	15442906
SRB	8772228
STP	215048
SUR	581363
SVK	5457012
SVN	2078654
SWE	10036391
SWZ	1.14813e+06
SYC	97741
SYR	17070132
TCD	15946882
TGO	8082359
THA	6.96256e+07
TJK	9.32102e+06
TKM	5942094
TTO	1394969
TUN	1.16947e+07
TUR	83429607
TWN	23773881
TZA	5.80055e+07
UGA	44269587
UKR	43993643
URY	3461731
USA	3.29065e+08
UZB	32981714
VEN	28515829
VGB	30033
VNM	96462108
VUT	299882
WSM	197093
YEM	29161922
ZAF	58558267
ZMB	17861034
ZWE	1.46455e+07

## Sheet: HDI
ISO_Code	HDI (2019)
AFG	0.492
ALB	0.8
DZA	0.742
AND	0.865
AGO	0.597
ATG	0.831
ARG	0.853
ARM	0.789
AUS	0.941
AUT	0.92
AZE	0.762
BHS	0.802
BHR	0.888
BGD	0.646
BRB	0.806
BLR	0.81
BEL	0.936
BLZ	0.718
BEN	0.506
BTN	0.668
BOL	0.715
BIH	0.78
BWA	0.703
BRA	0.764
BRN	0.827
BGR	0.813
BFA	0.446
BDI	0.423
CPV	0.667
KHM	0.596
CMR	0.586
CAN	0.932
CAF	0.391
TCD	0.398
CHL	0.859
CHN	0.775
COL	0.768
COM	0.584
COD	0.476
COG	0.596
CRI	0.811
CIV	0.529
HRV	0.866
CUB	0.766
CYP	0.901
CZE	0.896
DNK	0.946
DJI	0.508
DMA	0.745
DOM	0.765
ECU	0.758
EGY	0.724
SLV	0.676
GNQ	0.653
ERI	0.487
EST	0.893
SWZ	0.623
ETH	0.485
FJI	0.73
FIN	0.939
FRA	0.905
GAB	0.702
GMB	0.492
GEO	0.816
DEU	0.951
GHA	0.599
GRC	0.89
GRD	0.79
GTM	0.645
GIN	0.47
GNB	0.488
GUY	0.711
HTI	0.559
HND	0.629
HUN	0.854
ISL	0.958
IND	0.638
IDN	0.718
IRN	0.785
IRQ	0.678
IRL	0.942
ISR	0.909
ITA	0.899
JAM	0.712
JPN	0.918
JOR	0.744
KAZ	0.81
KEN	0.604
KIR	0.636
KOR	0.922
XKO	0.756
KWT	0.838
KGZ	0.699
LAO	0.617
LVA	0.873
LBN	0.76
LSO	0.528
LBR	0.485
LBY	0.756
LIE	0.94
LTU	0.886
LUX	0.925
MDG	0.498
MWI	0.514
MYS	0.805
MDV	0.753
MLI	0.421
MRT	0.552
MUS	0.806
MEX	0.781
FSM	0.64
MDA	0.773
MNG	0.749
MNE	0.841
MAR	0.684
MOZ	0.465
MMR	0.608
NAM	0.638
NPL	0.598
NLD	0.941
NZL	0.937
NIC	0.661
NER	0.39
NGA	0.537
MKD	0.787
NOR	0.961
OMN	0.841
PAK	0.537
PAN	0.82
PNG	0.562
PRY	0.746
PER	0.774
PHL	0.714
POL	0.88
PRT	0.864
QAT	0.869
ROU	0.834
RUS	0.839
RWA	0.531
WSM	0.712
STP	0.608
SAU	0.862
SEN	0.514
SRB	0.812
SLE	0.457
SGP	0.945
SVK	0.863
SVN	0.918
SLB	0.568
SOM	0.361
ZAF	0.741
SSD	0.391
ESP	0.904
LKA	0.775
KNA	0.838
LCA	0.733
VCT	0.789
SDN	0.521
SUR	0.71
SWE	0.947
CHE	0.96
SYR	0.564
TJK	0.668
TZA	0.533
THA	0.801
TLS	0.627
TGO	0.536
TON	0.74
TTO	0.813
TUN	0.74
TUR	0.842
TKM	0.732
TUV	0.654
UGA	0.544
UKR	0.774
ARE	0.933
GBR	0.933
USA	0.933
URY	0.818
UZB	0.725
VUT	0.614
VEN	0.72
VNM	0.717
PSE	0.722
YEM	0.43
ZMB	0.574
ZWE	0.56
MLT	0.905

## Sheet: Classification GLORIA
	Corespondance Matrix
Economic sector (GLORIA)	Mobility	Consumables	Housing	Food	Services	Check
Administrative_services	0	0	0	0	1	1
Air_transport	1	0	0	0	0	1
Alcoholic_and_other__beverages	0	0	0	1	0	1
Aluminium_ore	0	1	0	0	0	1
Animal_oils_and_fats	0	0	0	0	1	1
Arts__entertainment_and_recreation	0	1	0	0	0	1
Basic_aluminium	0	1	0	0	0	1
Basic_Copper	0	1	0	0	0	1
Basic_Gold	0	1	0	0	0	1
Basic_inorganic_chemicals	0	1	0	0	0	1
Basic_iron_and_steel	0	1	0	0	0	1
Basic_lead_zinc_silver	0	1	0	0	0	1
Basic_nickel	0	1	0	0	0	1
Basic_non_ferrous_metals_n_e_c_	0	1	0	0	0	1
Basic_organic_chemicals	0	1	0	0	0	1
Basic_petrochemical_products	0	1	0	0	0	1
Basic_tin	0	1	0	0	0	1
Beef_meat	0	0	0	1	0	1
Building_construction	0	0	1	0	0	1
Cement__lime_and_plaster_products	0	0	1	0	0	1
Cereal_products	0	0	0	1	0	1
Chemical_and_fertilizer_minerals	0	1	0	0	0	1
Civil_engineering_construction	0	0	1	0	0	1
Clay_building_materials	0	0	1	0	0	1
Coke_oven_products	0	0	1	0	0	1
Computers__electronic_products__optical_and_precision_instruments	0	1	0	0	0	1
Copper_ores	0	1	0	0	0	1
Crustaceans_and_molluscs	0	0	0	1	0	1
Dairy_products	0	0	0	1	0	1
Distribution_of_gaseous_fuels_through_mains	0	0	1	0	0	1
Dyes__paints__glues__detergents_and_other_chemical_products	0	1	0	0	0	1
Education	0	0	0	0	1	1
Electric_power_generation__transmission_and_distribution	0	0	1	0	0	1
Electrical_equipment	0	0	1	0	0	1
Extraction_of_salt	0	0	0	1	0	1
Fabricated_metal_products	0	1	0	0	0	1
Finance_and_insurance	0	0	0	0	1	1
Fish_products	0	0	0	1	0	1
Fishing	0	0	0	1	0	1
Food_products_and_feeds_n_e_c_	0	0	0	1	0	1
Forestry_and_logging	0	0	1	0	0	1
Fruit_products	0	0	0	1	0	1
Furniture_and_other_manufacturing_n_e_c	0	1	0	0	0	1
Gas_extraction	0	0	1	0	0	1
Gold_ores	0	1	0	0	0	1
Government__social_security__defence__public_order	0	0	0	0	1	1
Growing_beverage_crops__coffee__tea_etc_	0	0	0	1	0	1
Growing_cereals_n_e_c	0	0	0	1	0	1
Growing_crops_n_e_c_	0	0	0	1	0	1
Growing_fibre_crops	0	0	0	1	0	1
Growing_fruits_and_nuts	0	0	0	1	0	1
Growing_grapes	0	0	0	1	0	1
Growing_leguminous_crops_and_oil_seeds	0	0	0	1	0	1
Growing_maize	0	0	0	1	0	1
Growing_rice	0	0	0	1	0	1
Growing_spices__aromatic__drug_and_pharmaceutical_crops	0	0	0	1	0	1
Growing_sugar_beet_and_cane	0	0	0	1	0	1
Growing_tobacco	0	0	0	1	0	1
Growing_vegetables__roots__tubers	0	0	0	1	0	1
Growing_wheat	0	0	0	1	0	1
Hard_coal	0	0	1	0	0	1
Hospitality	0	0	0	0	1	1
Human_health_and_social_work_activities	0	0	0	0	1	1
Information_services	0	0	0	0	1	1
Iron_ores	0	1	0	0	0	1
Lead_zinc_silver_ores	0	1	0	0	0	1
Leather_and_footwear	0	1	0	0	0	1
Lignite_and_peat	0	1	0	0	0	1
Machinery_and_equipment	0	1	0	0	0	1
Materials_recovery	0	1	0	0	0	1
Mining_and_quarrying_n_e_c___services_to_mining	0	1	0	0	0	1
Motor_vehicles__trailers_and_semi_trailers	0	1	0	0	0	1
Nickel_ores	0	1	0	0	0	1
Nitrogenous_fertilizers	0	0	0	1	0	1
Non_nitrogenous_and_mixed_fertilizers	0	0	0	1	0	1
Other_ceramics_n_e_c_	0	1	0	0	0	1
Other_meat_products	0	0	0	1	0	1
Other_non_ferrous_ores	0	1	0	0	0	1
Other_non_metallic_mineral_products_n_e_c_	0	1	0	0	0	1
Other_services	0	0	0	0	1	1
Other_transport_equipment	1	0	0	0	0	1
Petroleum_extraction	1	0	0	0	0	1
Pharmaceuticals_and_medicinal_products	0	0	0	0	1	1
Plastic_products	0	1	0	0	0	1
Pork	0	0	0	1	0	1
Postal_and_courier_services	0	0	0	0	1	1
Poultry_meat	0	0	0	1	0	1
Printing	0	0	0	0	1	1
Professional__scientific_and_technical_services	0	0	0	0	1	1
Property_and_real_estate	0	0	1	0	0	1
Publishing	0	0	0	0	1	1
Pulp_and_paper	0	1	0	0	0	1
Quarrying_of_stone__sand_and_clay	0	0	1	0	0	1
Rail_transport	1	0	0	0	0	1
Raising_of_animals_n_e_c___services_to_agriculture	0	0	0	1	0	1
Raising_of_cattle	0	0	0	1	0	1
Raising_of_poultry	0	0	0	1	0	1
Raising_of_sheep	0	0	0	1	0	1
Raising_of_swine_pigs	0	0	0	1	0	1
Refined_petroleum_products	1	0	0	0	0	1
Repair_and_installation_of_machinery_and_equipment	0	1	0	0	0	1
Road_transport	1	0	0	0	0	1
Rubber_products	0	1	0	0	0	1
Sawmill_products	0	0	1	0	0	1
Seeds_and_plant_propagation	0	0	0	1	0	1
Services_to_transport	0	0	0	0	1	1
Sheep_meat	0	0	0	1	0	1
Sugar_refining__cocoa__chocolate_and_confectionery	0	0	0	1	0	1
Telecommunications	0	0	0	0	1	1
Textiles_and_clothing	0	1	0	0	0	1
Tin_ores	0	1	0	0	0	1
Tobacco_products	0	0	0	1	0	1
Transport_via_pipeline	0	0	1	0	0	1
Uranium_ores	0	1	0	0	0	1
Vegetable_oils_and_fats	0	0	0	1	0	1
Vegetable_products	0	0	0	1	0	1
Waste_collection__treatment__and_disposal	0	1	0	0	0	1
Water_collection__treatment_and_supply__sewerage	0	0	0	0	1	1
Water_transport	0	0	0	0	1	1
Wholesale_and_retail_trade__repair_of_motor_vehicles_and_motorcycles	1	0	0	0	0	1

## Sheet: Classification EXIOBASE_H
	Unit	Fossil fuels for mobility	Fossil fuels for shelter	Else	Sum	Comments	With weights for emissions	Fossil fuels for mobility	Fossil fuels for shelter		https://www.engineeringtoolbox.com/co2-emission-fuels-d_1085.html?utm_source=chatgpt.com
Air transport services (62)	Meuro	0	0	1	1			0	0		Fuel Type	Emission Factor (kg CO₂/kg fuel)
Aluminium and aluminium products	tonnes	0	0	1	1			0	0		Natural Gas	2.75
Aluminium ores and concentrates	tonnes	0	0	1	1			0	0		Propane	2.99
Animal products nec	tonnes	0	0	1	1			0	0		Butane	3.03
Ash for treatment, Re-processing of ash into clinker	tonnes (service)	0	0	1	1			0	0		Gasoline	3.3
Basic iron and steel and of ferro-alloys and first products thereof	tonnes	0	0	1	1			0	0		Kerosene (Jet)	3
Beverages	tonnes	0	0	1	1			0	0		Diesel	3.15
Biogas an other gases nec.	tonnes	0	1	0	1			0	2.75		Heavy Fuel Oil	3.11
Bottles for treatment, Recycling of bottles by direct reuse	tonnes (service)	0	0	1	1			0	0		Petroleum Coke	3.26
Bricks, tiles and construction products, in baked clay	tonnes	0	0	1	1			0	0		Anthracite Coal	3.37
Cattle	tonnes	0	0	1	1			0	0		Bituminous Coal	2.38
Cement, lime and plaster	tonnes	0	0	1	1			0	0		Subbituminous Coal	1.47
Ceramic goods	tonnes	0	0	1	1			0	0		Lignite	1.1
Cereal grains nec	tonnes	0	0	1	1			0	0
Chemical and fertilizer minerals, salt and other mining and quarrying products n.e.c.	tonnes	0	0	1	1			0	0
Chemicals nec; additives and biofuels	tonnes	0	0	1	1			0	0
Coal, lignite and peat	tonnes	0	1	0	1			0	1.1
Coke oven products	tonnes	0	1	0	1			0	3.26
Collected and purified water, distribution services of water (41)	Meuro	0	0	1	1			0	0
Computer and related services (72)	Meuro	0	0	1	1			0	0
Construction work (45)	Meuro	0	0	1	1			0	0
Copper ores and concentrates	tonnes	0	0	1	1			0	0
Copper products	tonnes	0	0	1	1			0	0
Crops nec	tonnes	0	0	1	1			0	0
Crude petroleum and services related to crude oil extraction, excluding surveying	tonnes	0	0	1	1			0	0
Dairy products	tonnes	0	0	1	1			0	0
Distribution and trade services of electricity	Meuro	0	0	1	1			0	0
Distribution services of gaseous fuels through mains	Meuro	0	0	1	1	Not taken because no physical unit		0	0
Education services (80)	Meuro	0	0	1	1			0	0
Electrical machinery and apparatus n.e.c. (31)	tonnes	0	0	1	1			0	0
Electricity by biomass and waste	TJ	0	0	1	1			0	0
Electricity by coal	TJ	0	0	1	1			0	0
Electricity by gas	TJ	0	0	1	1			0	0
Electricity by Geothermal	TJ	0	0	1	1			0	0
Electricity by hydro	TJ	0	0	1	1			0	0
Electricity by nuclear	TJ	0	0	1	1			0	0
Electricity by petroleum and other oil derivatives	TJ	0	0	1	1			0	0
Electricity by solar photovoltaic	TJ	0	0	1	1			0	0
Electricity by solar thermal	TJ	0	0	1	1			0	0
Electricity by tide, wave, ocean	TJ	0	0	1	1			0	0
Electricity by wind	TJ	0	0	1	1			0	0
Electricity nec	TJ	0	0	1	1			0	0
Extra-territorial organizations and bodies	Meuro	0	0	1	1			0	0
Fabricated metal products, except machinery and equipment (28)	tonnes	0	0	1	1			0	0
Financial intermediation services, except insurance and pension funding services (65)	Meuro	0	0	1	1			0	0
Fish and other fishing products; services incidental of fishing (05)	tonnes	0	0	1	1			0	0
Fish products	tonnes	0	0	1	1			0	0
Food products nec	tonnes	0	0	1	1			0	0
Food waste for treatment: biogasification and land application	tonnes (service)	0	0	1	1			0	0
Food waste for treatment: composting and land application	tonnes (service)	0	0	1	1			0	0
Food waste for treatment: incineration	tonnes (service)	0	0	1	1			0	0
Food waste for treatment: landfill	tonnes (service)	0	0	1	1			0	0
Food waste for treatment: waste water treatment	tonnes (service)	0	0	1	1			0	0
Foundry work services	tonnes	0	0	1	1			0	0
Furniture; other manufactured goods n.e.c. (36)	tonnes	0	0	1	1			0	0
Glass and glass products	tonnes	0	0	1	1			0	0
Health and social work services (85)	Meuro	0	0	1	1			0	0
Hotel and restaurant services (55)	Meuro	0	0	1	1			0	0
Inert/metal/hazardous waste for treatment: landfill	tonnes (service)	0	0	1	1			0	0
Inland water transportation services	Meuro	0	0	1	1			0	0
Insurance and pension funding services, except compulsory social security services (66)	Meuro	0	0	1	1			0	0
Intert/metal waste for treatment: incineration	tonnes (service)	0	0	1	1			0	0
Iron ores	tonnes	0	0	1	1			0	0
Lead, zinc and tin and products thereof	tonnes	0	0	1	1			0	0
Lead, zinc and tin ores and concentrates	tonnes	0	0	1	1			0	0
Leather and leather products (19)	tonnes	0	0	1	1			0	0
Machinery and equipment n.e.c. (29)	tonnes	0	0	1	1			0	0
Manure (biogas treatment)	tonnes (service)	0	0	1	1			0	0
Manure (conventional treatment)	tonnes (service)	0	0	1	1			0	0
Meat animals nec	tonnes	0	0	1	1			0	0
Meat products nec	tonnes	0	0	1	1			0	0
Medical, precision and optical instruments, watches and clocks (33)	tonnes	0	0	1	1			0	0
Membership organisation services n.e.c. (91)	Meuro	0	0	1	1			0	0
Motor vehicles, trailers and semi-trailers (34)	Meuro	0	0	1	1			0	0
Natural gas and services related to natural gas extraction, excluding surveying; inclulding liquid gas	tonnes	0	1	0	1			0	2.75
N-fertiliser	tonnes	0	0	1	1			0	0
Nickel ores and concentrates	tonnes	0	0	1	1			0	0
Nuclear fuel	TJ	0	0	1	1			0	0
Office machinery and computers (30)	tonnes	0	0	1	1			0	0
Oil seeds	tonnes	0	0	1	1			0	0
Oil/hazardous waste for treatment: incineration	tonnes (service)	0	0	1	1			0	0
Other business services (74)	Meuro	0	0	1	1			0	0
Other Hydrocarbons	tonnes	0	0	1	1			0	0
Other land transportation services	Meuro	0	0	1	1			0	0
Other non-ferrous metal ores and concentrates	tonnes	0	0	1	1			0	0
Other non-ferrous metal products	tonnes	0	0	1	1			0	0
Other non-metallic mineral products	tonnes	0	0	1	1			0	0
Other services (93)	Meuro	0	0	1	1			0	0
Other transport equipment (35)	Meuro	0	0	1	1			0	0
Other waste for treatment: waste water treatment	tonnes (service)	0	0	1	1			0	0
P- and other fertiliser	tonnes	0	0	1	1			0	0
Paddy rice	tonnes	0	0	1	1			0	0
Paper and paper products	tonnes	0	0	1	1			0	0
Paper and wood waste for treatment: composting and land application	tonnes (service)	0	0	1	1			0	0
Paper for treatment: landfill	tonnes (service)	0	0	1	1			0	0
Paper waste for treatment: biogasification and land application	tonnes (service)	0	0	1	1			0	0
Paper waste for treatment: incineration	tonnes (service)	0	0	1	1			0	0
Pigs	tonnes	0	0	1	1			0	0
Plant-based fibers	tonnes	0	0	1	1			0	0
Plastic waste for treatment: incineration	tonnes (service)	0	0	1	1			0	0
Plastic waste for treatment: landfill	tonnes (service)	0	0	1	1			0	0
Plastics, basic	tonnes	0	0	1	1			0	0
Post and telecommunication services (64)	Meuro	0	0	1	1			0	0
Poultry	tonnes	0	0	1	1			0	0
Precious metal ores and concentrates	tonnes	0	0	1	1			0	0
Precious metals	tonnes	0	0	1	1			0	0
Printed matter and recorded media (22)	tonnes	0	0	1	1			0	0
Private households with employed persons (95)	Meuro	0	0	1	1			0	0
Processed rice	tonnes	0	0	1	1			0	0
Products of forestry, logging and related services (02)	tonnes	0	0	1	1			0	0
Products of meat cattle	tonnes	0	0	1	1			0	0
Products of meat pigs	tonnes	0	0	1	1			0	0
Products of meat poultry	tonnes	0	0	1	1			0	0
products of Vegetable oils and fats	tonnes	0	0	1	1			0	0
Public administration and defence services; compulsory social security services (75)	Meuro	0	0	1	1			0	0
Pulp	tonnes	0	0	1	1			0	0
Radio, television and communication equipment and apparatus (32)	tonnes	0	0	1	1			0	0
Railway transportation services	Meuro	0	0	1	1			0	0
Raw milk	tonnes	0	0	1	1			0	0
Real estate services (70)	Meuro	0	0	1	1			0	0
Recreational, cultural and sporting services (92)	Meuro	0	0	1	1			0	0
Refined Petroleum	tonnes	1	0	0	1	Corresponds to an aggregation of a lot of different types of gasoline etc.		3.3	0
Renting services of machinery and equipment without operator and of personal and household goods (71)	Meuro	0	0	1	1			0	0
Research and development services (73)	Meuro	0	0	1	1			0	0
Retail trade services, except of motor vehicles and motorcycles; repair services of personal and household goods (52)	Meuro	0	0	1	1			0	0
Retail trade services of motor fuel	Meuro	0	0	1	1			0	0
Rubber and plastic products (25)	tonnes	0	0	1	1			0	0
Sale, maintenance, repair of motor vehicles, motor vehicles parts, motorcycles, motor cycles parts and accessoiries	Meuro	0	0	1	1	Not taken because no physical unit		0	0
Sand and clay	tonnes	0	0	1	1			0	0
Sea and coastal water transportation services	Meuro	0	0	1	1			0	0
Secondary aluminium for treatment, Re-processing of secondary aluminium into new aluminium	tonnes (service)	0	0	1	1			0	0
Secondary construction material for treatment, Re-processing of secondary construction material into aggregates	tonnes (service)	0	0	1	1			0	0
Secondary copper for treatment, Re-processing of secondary copper into new copper	tonnes (service)	0	0	1	1			0	0
Secondary glass for treatment, Re-processing of secondary glass into new glass	tonnes (service)	0	0	1	1			0	0
Secondary lead for treatment, Re-processing of secondary lead into new lead	tonnes (service)	0	0	1	1			0	0
Secondary other non-ferrous metals for treatment, Re-processing of secondary other non-ferrous metals into new other non-ferrous metals	tonnes (service)	0	0	1	1			0	0
Secondary paper for treatment, Re-processing of secondary paper into new pulp	tonnes	0	0	1	1			0	0
Secondary plastic for treatment, Re-processing of secondary plastic into new plastic	tonnes	0	0	1	1			0	0
Secondary preciuos metals for treatment, Re-processing of secondary preciuos metals into new preciuos metals	tonnes (service)	0	0	1	1			0	0
Secondary raw materials	Meuro	0	0	1	1			0	0
Secondary steel for treatment, Re-processing of secondary steel into new steel	tonnes (service)	0	0	1	1			0	0
Services auxiliary to financial intermediation (67)	Meuro	0	0	1	1			0	0
Sewage sludge for treatment: biogasification and land application	tonnes (service)	0	0	1	1			0	0
Steam and hot water supply services	TJ	0	0	1	1			0	0
Stone	tonnes	0	0	1	1			0	0
Sugar	tonnes	0	0	1	1			0	0
Sugar cane, sugar beet	tonnes	0	0	1	1			0	0
Supporting and auxiliary transport services; travel agency services (63)	Meuro	0	0	1	1			0	0
Textiles (17)	tonnes	0	0	1	1			0	0
Textiles waste for treatment: incineration	tonnes (service)	0	0	1	1			0	0
Textiles waste for treatment: landfill	tonnes (service)	0	0	1	1			0	0
Tobacco products (16)	tonnes	0	0	1	1			0	0
Transmission services of electricity	Meuro	0	0	1	1			0	0
Transportation services via pipelines	Meuro	0	0	1	1			0	0
Uranium and thorium ores (12)	tonnes	0	0	1	1			0	0
Vegetables, fruit, nuts	tonnes	0	0	1	1			0	0
Wearing apparel; furs (18)	tonnes	0	0	1	1			0	0
Wheat	tonnes	0	0	1	1			0	0
Wholesale trade and commission trade services, except of motor vehicles and motorcycles (51)	Meuro	0	0	1	1			0	0
Wood and products of wood and cork (except furniture); articles of straw and plaiting materials (20)	tonnes	0	0	1	1			0	0
Wood material for treatment, Re-processing of secondary wood material into new wood material	tonnes (service)	0	0	1	1			0	0
Wood waste for treatment: incineration	tonnes (service)	0	0	1	1			0	0
Wood waste for treatment: landfill	tonnes (service)	0	0	1	1			0	0
Wool, silk-worm cocoons	tonnes	0	0	1	1			0	0

## Sheet: F_Y split
	Impacts (kg CO2-eq)
	Mobility	Housing
ALB	0.447942	0.552058
AND	0.447942	0.552058
BLR	0.447942	0.552058
BIH	0.447942	0.552058
ISL	0.447942	0.552058
XKX	0.447942	0.552058
LIE	0.447942	0.552058
MCO	0.447942	0.552058
MNE	0.447942	0.552058
MDA	0.447942	0.552058
SMR	0.447942	0.552058
SRB	0.447942	0.552058
MKD	0.447942	0.552058
UKR	0.447942	0.552058
AFG	0.403662	0.596338
ARM	0.403662	0.596338
AZE	0.403662	0.596338
BGD	0.403662	0.596338
BTN	0.403662	0.596338
BRN	0.403662	0.596338
KHM	0.403662	0.596338
HKG	0.403662	0.596338
MAC	0.403662	0.596338
COK	0.403662	0.596338
PRK	0.403662	0.596338
FJI	0.403662	0.596338
PYF	0.403662	0.596338
GEO	0.403662	0.596338
KAZ	0.403662	0.596338
KIR	0.403662	0.596338
KGZ	0.403662	0.596338
LAO	0.403662	0.596338
MYS	0.403662	0.596338
MDV	0.403662	0.596338
MHL	0.403662	0.596338
FSM	0.403662	0.596338
MNG	0.403662	0.596338
MMR	0.403662	0.596338
NRU	0.403662	0.596338
NPL	0.403662	0.596338
NCL	0.403662	0.596338
NZL	0.403662	0.596338
PAK	0.403662	0.596338
PLW	0.403662	0.596338
PNG	0.403662	0.596338
PHL	0.403662	0.596338
WSM	0.403662	0.596338
SGP	0.403662	0.596338
SLB	0.403662	0.596338
LKA	0.403662	0.596338
TJK	0.403662	0.596338
THA	0.403662	0.596338
TLS	0.403662	0.596338
TON	0.403662	0.596338
TKM	0.403662	0.596338
TUV	0.403662	0.596338
UZB	0.403662	0.596338
VUT	0.403662	0.596338
VNM	0.403662	0.596338
DZA	0.717346	0.282654
AGO	0.717346	0.282654
AIA	0.742244	0.257756
ATG	0.742244	0.257756
ARG	0.742244	0.257756
ABW	0.742244	0.257756
AUS	0.880113	0.119887
AUT	0.73361	0.26639
BHS	0.742244	0.257756
BHR	0.785662	0.214338
BRB	0.742244	0.257756
BEL	0.508331	0.491669
BLZ	0.742244	0.257756
BEN	0.717346	0.282654
BMU	0.742244	0.257756
BOL	0.742244	0.257756
BWA	0.717346	0.282654
BRA	0.969075	0.0309249
VGB	0.742244	0.257756
BGR	0.420047	0.579953
BFA	0.717346	0.282654
BDI	0.717346	0.282654
CPV	0.717346	0.282654
CMR	0.717346	0.282654
CAN	0.666791	0.333209
CYM	0.742244	0.257756
CAF	0.717346	0.282654
TCD	0.717346	0.282654
CHL	0.742244	0.257756
CHN	0.448289	0.551711
COL	0.742244	0.257756
COM	0.717346	0.282654
COG	0.717346	0.282654
CRI	0.742244	0.257756
HRV	0.537643	0.462357
CUB	0.742244	0.257756
CUW	0.742244	0.257756
CYP	0.994992	0.00500821
CZE	0.574907	0.425093
CIV	0.717346	0.282654
COD	0.717346	0.282654
DNK	0.55434	0.44566
DJI	0.717346	0.282654
DMA	0.742244	0.257756
DOM	0.742244	0.257756
ECU	0.742244	0.257756
EGY	0.785662	0.214338
SLV	0.742244	0.257756
GNQ	0.717346	0.282654
ERI	0.717346	0.282654
EST	0.186488	0.813512
ETH	0.717346	0.282654
FIN	0.520292	0.479708
ANT	0.742244	0.257756
FRA	0.856274	0.143726
GAB	0.717346	0.282654
GMB	0.717346	0.282654
DEU	0.743541	0.256459
GHA	0.717346	0.282654
GRC	0.722084	0.277916
GRL	0.742244	0.257756
GRD	0.742244	0.257756
GTM	0.742244	0.257756
GIN	0.717346	0.282654
GNB	0.717346	0.282654
GUY	0.742244	0.257756
HTI	0.742244	0.257756
HND	0.742244	0.257756
HUN	0.671981	0.328019
IND	0.647796	0.352204
IDN	0.566558	0.433442
IRN	0.785662	0.214338
IRQ	0.785662	0.214338
IRL	0.528562	0.471438
ISR	0.785662	0.214338
ITA	0.735428	0.264572
JAM	0.742244	0.257756
JPN	0.910278	0.0897222
JOR	0.785662	0.214338
KEN	0.717346	0.282654
KWT	0.785662	0.214338
LVA	0.40825	0.59175
LBN	0.785662	0.214338
LSO	0.717346	0.282654
LBR	0.717346	0.282654
LBY	0.717346	0.282654
LTU	0.32107	0.67893
LUX	0.381879	0.618121
MDG	0.717346	0.282654
MWI	0.717346	0.282654
MLI	0.717346	0.282654
MLT	0.998949	0.00105062
MRT	0.717346	0.282654
MUS	0.717346	0.282654
MEX	0.840093	0.159907
MSR	0.742244	0.257756
MAR	0.717346	0.282654
MOZ	0.717346	0.282654
NAM	0.717346	0.282654
NLD	0.617996	0.382004
NIC	0.742244	0.257756
NER	0.717346	0.282654
NGA	0.717346	0.282654
NOR	0.912168	0.0878317
OMN	0.785662	0.214338
PAN	0.742244	0.257756
PRY	0.742244	0.257756
PER	0.742244	0.257756
POL	0.563188	0.436812
PRT	0.384613	0.615387
PRI	0.742244	0.257756
QAT	0.785662	0.214338
KOR	0.83006	0.16994
ROU	0.514892	0.485108
RUS	0.709943	0.290057
RWA	0.717346	0.282654
KNA	0.742244	0.257756
LCA	0.742244	0.257756
STP	0.717346	0.282654
SAU	0.785662	0.214338
SEN	0.717346	0.282654
SYC	0.717346	0.282654
SLE	0.717346	0.282654
SXM	0.742244	0.257756
SVK	0.429377	0.570623
SVN	0.65766	0.34234
SOM	0.717346	0.282654
ZAF	0.205969	0.794031
SSD	0.717346	0.282654
ESP	0.88227	0.11773
VCT	0.742244	0.257756
PSE	0.785662	0.214338
SDN	0.717346	0.282654
SUR	0.742244	0.257756
SWZ	0.717346	0.282654
SWE	0.313067	0.686933
CHE	0.644438	0.355562
SYR	0.785662	0.214338
TGO	0.717346	0.282654
TTO	0.742244	0.257756
TUN	0.717346	0.282654
TUR	0.448634	0.551366
TCA	0.742244	0.257756
TZA	0.717346	0.282654
UGA	0.717346	0.282654
ARE	0.785662	0.214338
GBR	0.634325	0.365675
USA	0.796506	0.203494
URY	0.742244	0.257756
VEN	0.742244	0.257756
YEM	0.785662	0.214338
ZMB	0.717346	0.282654
(Part of Tanzania - TZA)	0.717346	0.282654
ZWE	0.717346	0.282654
TWN	0.448289	0.551711

[truncated: 3 more sheets: SA_Model area size, SA_Results, SA_IQR]
